# Supplementary material for: Serum profiling identifies CCL8, CXCL13, and IL-1RA as markers of active disease in patients with systemic lupus erythematosus
Source: PubMed Central journal article supplement (PMC10720584; doi:10.3389/fimmu.2023.1257085), 2023-11-30
Supplement: DataSheet_1.pdf [file DataSheet_1.pdf]

## *Supplementary Material*

### **Table of contents**

|    |                                                                                                                                                                                           |    |
|----|-------------------------------------------------------------------------------------------------------------------------------------------------------------------------------------------|----|
| 1  | Supplementary Table 1. Main inclusion and exclusion criteria .....                                                                                                                        | 3  |
| 2  | List of local investigators from the participating clinical sites.....                                                                                                                    | 4  |
| 3  | Supplementary Table 2. Serum levels of selected autoimmunity-associated cytokines in patients with SLE versus healthy controls in the PRECISESADS study population .....                  | 5  |
| 4  | Supplementary Table 3. Serum levels of selected autoimmunity-associated cytokines in patients with active versus inactive SLE in the PRECISESADS study population .....                   | 7  |
| 5  | Supplementary Table 4. Serum levels of selected autoimmunity-associated cytokines in patients with active SLE versus healthy controls in the PRECISESADS study population .....           | 9  |
| 6  | Supplementary Table 5. Serum levels of selected autoimmunity-associated cytokines in patients with inactive SLE versus healthy controls in the PRECISESADS study population .....         | 11 |
| 7  | Supplementary Table 6. Serum levels of selected autoimmunity-associated cytokines in patients with autoimmune diseases* versus healthy controls in the PRECISESADS study population ..... | 13 |
| 8  | Supplementary Table 7. Serum levels of selected autoimmunity-associated cytokines in patients with SLE versus other autoimmune diseases* in the PRECISESADS study population .....        | 16 |
| 9  | Supplementary Table 8. Serum levels of selected autoimmunity-associated cytokines in patients with pAPS versus healthy controls in the PRECISESADS study population.....                  | 19 |
| 10 | Supplementary Table 9. Serum levels of selected autoimmunity-associated cytokines in patients with SLE versus pAPS in the PRECISESADS study population.....                               | 21 |
| 11 | Supplementary Table 10. Serum levels of selected autoimmunity-associated cytokines in patients with pAPS versus other autoimmune diseases* in the PRECISESADS study population.....       | 23 |
| 12 | Supplementary Table 11. Correlations between cytokine levels and disease activity in patients with SLE .....                                                                              | 26 |
| 13 | Supplementary Table 12. Correlations between positivity for selected serological markers and the cSLEDAI-2K CNS domain .....                                                              | 28 |
| 14 | Supplementary Table 13. Correlations between positivity for selected serological markers and the cSLEDAI-2K vascular domain.....                                                          | 29 |
| 15 | Supplementary Table 14. Correlations between positivity for selected serological markers and the cSLEDAI-2K musculoskeletal domain .....                                                  | 30 |
| 16 | Supplementary Table 15. Correlations between positivity for selected serological markers and the cSLEDAI-2K renal domain .....                                                            | 31 |
| 17 | Supplementary Table 16. Correlations between positivity for selected serological markers and the cSLEDAI-2K mucocutaneous domain .....                                                    | 32 |
| 18 | Supplementary Table 17. Correlations between positivity for selected serological markers and the cSLEDAI-2K serosal domain .....                                                          | 33 |

19 Supplementary Table 18. Correlations between positivity for selected serological markers and the cSLEDAI-2K constitutional domain .....34

20 Supplementary Table 19. Correlations between positivity for selected serological markers and the cSLEDAI-2K haematological domain.....35

21 Supplementary Table 20. Correlations between positivity for selected serological markers and history of or current mucocutaneous manifestations .....36

22 Supplementary Table 21. Correlations between positivity for selected serological markers and history of or current arthritis.....37

23 Supplementary Table 22. Correlations between positivity for selected serological markers and history of or current serositis .....38

24 Supplementary Table 23. Correlations between positivity for selected serological markers and history of or current lupus nephritis .....39

25 Supplementary Table 24. Correlations between positivity for selected serological markers and history of or current neuropsychiatric systemic lupus erythematosus.....40

26 Supplementary Table 25. Correlations between positivity for selected serological markers and history of or current haematological manifestations .....41

**I Supplementary Table 1. Main inclusion and exclusion criteria**

| Inclusion criteria                                                                                                                                                                                                                                   | Exclusion criteria                                                                                                                                                                                                                                                                                                                                                                                                                                                                                                                                                                                                                                                                                                                                                                                                                                                                                                                                                                                                                                                                                                                                                                                                                                                                                                                                                                                                                                                                                                                                                                                                                                                                                                                                                                                                                                 |
|------------------------------------------------------------------------------------------------------------------------------------------------------------------------------------------------------------------------------------------------------|----------------------------------------------------------------------------------------------------------------------------------------------------------------------------------------------------------------------------------------------------------------------------------------------------------------------------------------------------------------------------------------------------------------------------------------------------------------------------------------------------------------------------------------------------------------------------------------------------------------------------------------------------------------------------------------------------------------------------------------------------------------------------------------------------------------------------------------------------------------------------------------------------------------------------------------------------------------------------------------------------------------------------------------------------------------------------------------------------------------------------------------------------------------------------------------------------------------------------------------------------------------------------------------------------------------------------------------------------------------------------------------------------------------------------------------------------------------------------------------------------------------------------------------------------------------------------------------------------------------------------------------------------------------------------------------------------------------------------------------------------------------------------------------------------------------------------------------------------|
| <p><b>For all patients</b></p> <ul style="list-style-type: none"> <li>- Age <math>\geq</math>18 years</li> <li>- Diagnosed according to the prevailing criteria for systemic lupus erythematosus (SLE)</li> <li>- Informed consent signed</li> </ul> | <p><b>For all patients</b></p> <ul style="list-style-type: none"> <li>- Pediatric lupus</li> <li>- Drug-induced lupus</li> <li>- Severe nephrotic syndrome with proteinuria <math>\geq</math>3.5 g/day</li> <li>- Patients with stable doses of prednisone equivalent <math>&gt;</math>15 mg/day for the last 3 months or with IV corticosteroids in the last 3 months</li> <li>- Patients under immunosuppressant treatment in the last 3 months prior to recruitment and patients with combined therapy using two or more immunosuppressants:               <ul style="list-style-type: none"> <li>• Methotrexate <math>\geq</math>25mg/week</li> <li>• Azathioprine <math>\geq</math>2.5mg/kg/day</li> <li>• Cyclosporine A <math>&gt;</math>3mg/kg/day</li> <li>• Mycophenolate mofetil <math>&gt;</math>2g/day</li> </ul> </li> <li>- Chronic HBV or HCV infection</li> <li>- Patients who are also diagnosed according to the prevailing criteria for one of the following autoimmune diseases:               <ul style="list-style-type: none"> <li>• Rheumatoid arthritis (RA)</li> <li>• Scleroderma or systemic sclerosis (SSc)</li> <li>• Primary Sjögren’s syndrome (pSjS)</li> <li>• Primary antiphospholipid syndrome (pAPS)</li> <li>• Mixed connective tissue disease (MCTD)</li> <li>• Patients with undifferentiated connective tissue disease (UCTD) for over 1 year and that do not fulfill the diagnosis of any of the above diseases or SLE</li> </ul> </li> </ul> <p><b>For controls</b></p> <ul style="list-style-type: none"> <li>- Individuals on chronic medication</li> <li>- Individuals suffering from any inflammatory autoimmune, allergic or infectious condition, and with a history of autoimmune disease, particularly thyroid disease or other diseases that may modify cellular profiles in blood</li> </ul> |

Adapted from “Integrative Analysis Reveals a Molecular Stratification of Systemic Autoimmune Diseases.” *Arthritis Rheum.* 2021;73(6):1073-1085. Copyright 2021 by the American College of Rheumatology. Adapted with permission. IV: intravenous, HBV: hepatitis B virus, HCV: hepatitis C virus.

## 2 List of local investigators from the participating clinical sites

Lorenzo Beretta<sup>1</sup>, Barbara Vigone<sup>1</sup>, Jacques-Olivier Pers<sup>2</sup>, Alain Saraux<sup>2</sup>, Valérie Devauchelle-Pensec<sup>2</sup>, Divi Cornec<sup>2</sup>, Sandrine Jousse-Joulin<sup>2</sup>, Bernard Lauwerys<sup>3</sup>, Julie Ducreux<sup>3</sup>, Anne-Lise Maudoux<sup>3</sup>, Carlos Vasconcelos<sup>4</sup>, Ana Tavares<sup>4</sup>, Esmeralda Neves<sup>4</sup>, Raquel Faria<sup>4</sup>, Mariana Brandão<sup>4</sup>, Ana Campar<sup>4</sup>, António Marinho<sup>4</sup>, Fátima Farinha<sup>4</sup>, Isabel Almeida<sup>4</sup>, Miguel Angel Gonzalez-Gay Mantecón<sup>5</sup>, Ricardo Blanco Alonso<sup>5</sup>, Alfonso Corrales Martínez<sup>5</sup>, Ricard Cervera<sup>6</sup>, Ignasi Rodríguez-Pintó<sup>6</sup>, Gerard Espinosa<sup>6</sup>, Rik Lories<sup>7</sup>, Ellen De Langhe<sup>7</sup>, Nicolas Hunzelmann<sup>8</sup>, Doreen Belz<sup>8</sup>, Torsten Witte<sup>9</sup>, Niklas Baerlecken<sup>9</sup>, Georg Stummvoll<sup>10</sup>, Michael Zauner<sup>10</sup>, Michaela Lehner<sup>10</sup>, Eduardo Collantes<sup>11</sup>, Rafaela Ortega-Castro<sup>11</sup>, M<sup>a</sup> Angeles Aguirre-Zamorano<sup>11</sup>, Alejandro Escudero-Contreras<sup>11</sup>, M<sup>a</sup> Carmen Castro-Villegas<sup>11</sup>, Norberto Ortego<sup>12</sup>, María Concepción Fernández Roldán<sup>12</sup>, Enrique Raya<sup>13</sup>, Inmaculada Jiménez Moleón<sup>13</sup>, Enrique de Ramon<sup>14</sup>, Isabel Díaz Quintero<sup>14</sup>, Pier Luigi Meroni<sup>15</sup>, Maria Gerosa<sup>15</sup>, Tommaso Schioppo<sup>15</sup>, Carolina Artusi<sup>15</sup>, Carlo Chizzolini<sup>16</sup>, Aleksandra Zuber<sup>16</sup>, Donatienne Wynar<sup>16</sup>, Laszlo Kovács<sup>17</sup>, Attila Balog<sup>17</sup>, Magdolna Deák<sup>17</sup>, Márta Bocskai<sup>17</sup>, Sonja Dulic<sup>17</sup>, Gabriella Kádár<sup>17</sup>, Falk Hiepe<sup>18</sup>, Velia Gerl<sup>18</sup>, Silvia Thiel<sup>18</sup>, Manuel Rodriguez Maresca<sup>19</sup>, Antonio López-Berrio<sup>19</sup>, Rocío Aguilar-Quesada<sup>19</sup>, Héctor Navarro-Linares<sup>19</sup>

### Affiliations

1. Referral Center for Systemic Autoimmune Diseases, Fondazione IRCCS Ca' Granda Ospedale Maggiore Policlinico di Milano, Italy.
2. Centre Hospitalier Universitaire de Brest, Hospital de la Cavale Blanche, Brest, France.
3. Pôle de pathologies rhumatismales systémiques et inflammatoires, Institut de Recherche Expérimentale et Clinique, Université catholique de Louvain, Brussels, Belgium.
4. Centro Hospitalar do Porto, Portugal.
5. Servicio Cantabro de Salud, Hospital Universitario Marqués de Valdecilla, Santander, Spain.
6. Hospital Clinic I Provincia, Institut d'Investigacions Biomèdiques August Pi i Sunyer, Barcelona, Spain.
7. Katholieke Universiteit Leuven, Belgium.
8. Klinikum der Universitaet zu Koeln, Cologne, Germany.
9. Medizinische Hochschule Hannover, Germany.
10. Medical University Vienna, Vienna, Austria.
11. Servicio Andaluz de Salud, Hospital Universitario Reina Sofía Córdoba, Spain.
12. Servicio Andaluz de Salud, Complejo hospitalario Universitario de Granada (Hospital Universitario San Cecilio), Spain.
13. Servicio Andaluz de Salud, Complejo hospitalario Universitario de Granada (Hospital Virgen de las Nieves), Spain.
14. Servicio Andaluz de Salud, Hospital Regional Universitario de Málaga, Spain
15. Università degli studi di Milano, Milan, Italy.
16. Hôpitaux Universitaires de Genève, Switzerland.
17. University of Szeged, Szeged, Hungary.
18. Charite, Berlin, Germany.
19. Andalusian Public Health System Biobank, Granada, Spain

**3 Supplementary Table 2.** Serum levels of selected autoimmunity-associated cytokines in patients with SLE versus healthy controls in the PRECISESADS study population

| Cytokines      | SLE     |                       | HC      |                       | p value |
|----------------|---------|-----------------------|---------|-----------------------|---------|
|                | n/N     | Serum levels (pg/mL)  | n/N     | Serum levels (pg/mL)  |         |
| BAFF           | 258/422 | 6.04 (5.84–6.17)      | 295/546 | 5.97 (5.87–6.05)      | <0.001  |
| CCL13          | 194/422 | 2.16 (2.01–2.27)      | 178/546 | 2.15 (2.04–2.26)      | 0.608   |
| CCL17          | 194/422 | 2.80 (2.62–3.02)      | 178/546 | 2.71 (2.50–2.87)      | <0.001  |
| CCL18          | 45/422  | 4.60 (4.49–4.68)      | 48/546  | 4.49 (4.38–4.55)      | 0.018   |
| CCL2           | 45/422  | 2.65 (2.50–2.71)      | 48/546  | 2.61 (2.55–2.70)      | 0.851   |
| CCL20          | 45/422  | 1.68 (1.48–1.86)      | 48/546  | 1.58 (1.46–1.78)      | 0.267   |
| CCL3           | 38/422  | 2.31 (2.15–2.47)      | 42/546  | 2.30 (2.13–2.46)      | 0.992   |
| CCL4           | 184/422 | 2.23 (2.08–2.49)      | 160/546 | 2.20 (1.95–2.52)      | 0.229   |
| CCL5           | 45/422  | 4.67 (4.46–4.81)      | 48/546  | 4.69 (4.55–4.84)      | 0.569   |
| CCL7           | 44/422  | 1.99 (1.81–2.30)      | 45/546  | 1.93 (1.62–2.21)      | 0.188   |
| CCL8           | 194/422 | 1.92 (1.76–2.05)      | 178/546 | 1.82 (1.72–1.94)      | <0.001  |
| CRP            | 162/422 | 6.16 (5.61–6.57)      | 143/546 | 5.97 (5.42–6.36)      | 0.005   |
| CXCL1          | 25/422  | 2.09 (1.94–2.20)      | 27/546  | 2.04 (1.91–2.30)      | 0.956   |
| CXCL10         | 194/422 | 1.45 (1.29–1.77)      | 178/546 | 1.28 (1.13–1.40)      | <0.001  |
| CXCL11         | 45/422  | 2.46 (2.29–2.55)      | 48/546  | 2.36 (2.27–2.46)      | 0.017   |
| CXCL13         | 194/422 | 2.02 (1.85–2.24)      | 175/546 | 1.78 (1.69–1.89)      | <0.001  |
| CXCL16         | 45/422  | 3.11 (3.04–3.19)      | 48/546  | 3.07 (3.02–3.10)      | 0.004   |
| CXCL5          | 45/422  | 3.06 (2.87–3.27)      | 48/546  | 3.15 (3.04–3.38)      | 0.124   |
| CXCL9          | 45/422  | 2.78 (2.67–3.00)      | 47/546  | 2.78 (2.67–2.86)      | 0.125   |
| DcR1           | 45/422  | 3.47 (3.33–3.64)      | 48/546  | 3.53 (3.39–3.60)      | 0.643   |
| DcR3           | 45/422  | 2.64 (2.49–2.73)      | 47/546  | 2.64 (2.48–2.75)      | 0.582   |
| E-selectin     | 45/422  | 4.40 (4.26–4.49)      | 48/546  | 4.38 (4.21–4.50)      | 0.845   |
| EGF            | 45/422  | 2.27 (2.06–2.44)      | 48/546  | 2.30 (2.04–2.39)      | 0.906   |
| Fas            | 45/422  | 3.89 (3.83–4.02)      | 48/546  | 3.86 (3.82–3.90)      | 0.059   |
| FasL           | 194/422 | 1.65 (1.49–1.78)      | 178/546 | 1.62 (1.54–1.73)      | 0.628   |
| FGF2           | 45/422  | 2.18 (2.06–2.26)      | 48/546  | 2.12 (2.06–2.24)      | 0.389   |
| FGF21          | 44/422  | 3.33 (3.18–3.45)      | 48/546  | 3.35 (3.17–3.46)      | 0.897   |
| G-CSF          | 45/422  | 1.48 (1.41–1.55)      | 47/546  | 1.39 (1.31–1.46)      | 0.003   |
| Galactin-3     | 45/422  | 3.89 (3.79–3.98)      | 48/546  | 3.85 (3.78–3.91)      | 0.113   |
| GDF15          | 194/422 | 2.89 (2.70–3.11)      | 178/546 | 2.70 (2.57–2.84)      | <0.001  |
| GH             | 45/422  | 3.43 (2.96–3.62)      | 48/546  | 3.02 (2.61–3.42)      | 0.034   |
| HGF            | 45/422  | 2.26 (2.14–2.41)      | 48/546  | 2.32 (2.23–2.40)      | 0.385   |
| ICAM-1         | 45/422  | 5.39 (5.24–5.61)      | 48/546  | 5.40 (5.18–5.52)      | 0.498   |
| IFN- $\gamma$  | 32/422  | 26.09 (21.99–32.58)   | 39/546  | 17.51 (13.79–20.56)   | <0.001  |
| IFNGR1         | 45/422  | 1.88 (1.84–2.00)      | 48/546  | 1.88 (1.79–1.92)      | 0.070   |
| IL-10          | 23/422  | 0.54 (0.22–1.12)      | 15/546  | 0.28 (0.19–0.56)      | 0.244   |
| IL-12          | 13/422  | 10.70 (6.58–28.37)    | 19/546  | 14.81 (6.11–30.33)    | 0.939   |
| IL-13          | 22/422  | 2.21 (2.05–2.30)      | 24/546  | 2.33 (1.89–2.44)      | 0.261   |
| IL-17A         | 18/422  | 1.94 (0.62–3.35)      | 15/546  | 2.99 (1.86–4.99)      | 0.158   |
| IL-17F         | 18/422  | 1.11 (0.76–1.52)      | 12/546  | 0.94 (0.25–1.18)      | 0.305   |
| IL-18BP        | 45/422  | 2.43 (2.32–2.64)      | 48/546  | 2.28 (2.05–2.44)      | 0.002   |
| IL-1 $\alpha$  | 45/422  | 1.61 (1.44–1.72)      | 48/546  | 1.52 (1.38–1.78)      | 0.258   |
| IL-1 $\beta$   | 25/422  | 4.49 (3.21–7.15)      | 31/546  | 3.17 (1.89–4.81)      | 0.015   |
| IL-1R1         | 45/422  | 3.17 (3.06–3.23)      | 48/546  | 3.11 (3.07–3.16)      | 0.194   |
| IL-1R2         | 194/422 | 3.84 (3.74–3.90)      | 178/546 | 3.83 (3.77–3.89)      | 0.896   |
| IL-1RA         | 192/422 | 3.01 (2.89–3.19)      | 178/546 | 2.92 (2.78–3.05)      | <0.001  |
| IL-2           | 32/422  | 1.98 (1.82–2.09)      | 28/546  | 1.88 (1.66–2.06)      | 0.159   |
| IL-22          | 7/422   | 1.24 (0.96–1.30)      | 7/546   | 1.31 (0.84–1.46)      | 0.620   |
| IL-23          | 45/422  | 2.61 (2.50–2.71)      | 48/546  | 2.56 (2.45–2.65)      | 0.257   |
| IL-27          | 21/422  | 185.83 (99.39–281.72) | 18/546  | 117.50 (48.72–188.24) | 0.088   |
| IL-28A         | 26/422  | 2.38 (1.86–2.68)      | 27/546  | 2.05 (1.80–2.16)      | 0.027   |
| IL-2R $\alpha$ | 45/422  | 2.72 (2.62–2.89)      | 48/546  | 2.63 (2.53–2.72)      | <0.001  |

|                                 |         |                        |         |                       |                  |
|---------------------------------|---------|------------------------|---------|-----------------------|------------------|
| <b>IL-31</b>                    | 38/422  | 2.10 (2.02–2.17)       | 43/546  | 2.06 (1.93–2.21)      | 0.508            |
| <b>IL-33</b>                    | 29/422  | 3.48 (2.19–5.21)       | 33/546  | 3.07 (2.25–5.80)      | 0.767            |
| <b>IL-5</b>                     | 32/422  | 3.72 (3.10–4.16)       | 38/546  | 3.90 (3.47–4.50)      | 0.179            |
| <b>IL-6</b>                     | 256/422 | 3.33 (2.90–3.60)       | 290/546 | 3.18 (2.91–3.38)      | <b>&lt;0.001</b> |
| <b>IL-6R<math>\alpha</math></b> | 45/422  | 4.08 (4.01–4.11)       | 48/546  | 4.07 (4.03–4.12)      | 0.948            |
| <b>IL-8</b>                     | 45/422  | 1.28 (1.16–1.41)       | 48/546  | 1.29 (1.20–1.36)      | 0.531            |
| <b>IL-9</b>                     | 7/422   | 302.42 (194.84–529.25) | 6/546   | 263.29 (52.12–558.71) | 0.720            |
| <b>M-CSF</b>                    | 13/422  | 55.62 (31.77–67.73)    | 16/546  | 58.42 (29.66–166.84)  | 0.380            |
| <b>MDC</b>                      | 45/422  | 2.87 (2.70–2.96)       | 48/546  | 2.83 (2.70–2.91)      | 0.292            |
| <b>MIF</b>                      | 44/422  | 3.79 (3.55–3.95)       | 48/546  | 3.60 (3.44–3.83)      | <b>0.020</b>     |
| <b>MMP-1</b>                    | 45/422  | 3.29 (3.02–3.49)       | 48/546  | 3.30 (3.12–3.45)      | 1.000            |
| <b>MMP-12</b>                   | 5/422   | 107.31 (98.79–130.23)  | 7/546   | 53.62 (35.45–91.67)   | 0.415            |
| <b>MMP-13</b>                   | 41/422  | 2.58 (2.39–2.73)       | 40/546  | 2.54 (2.35–2.60)      | 0.221            |
| <b>MMP-2</b>                    | 164/422 | 5.33 (5.26–5.42)       | 143/546 | 5.35 (5.27–5.44)      | 0.344            |
| <b>MMP-3</b>                    | 45/422  | 4.22 (3.99–4.45)       | 47/546  | 4.09 (3.98–4.19)      | <b>0.021</b>     |
| <b>MMP-7</b>                    | 45/422  | 3.40 (3.24–3.55)       | 48/546  | 3.32 (3.18–3.41)      | 0.078            |
| <b>MMP-8</b>                    | 193/422 | 3.51 (3.26–3.78)       | 178/546 | 3.57 (3.35–3.80)      | 0.125            |
| <b>MMP-9</b>                    | 45/422  | 5.28 (5.02–5.44)       | 48/546  | 5.35 (5.24–5.47)      | <b>0.037</b>     |
| <b>MPO</b>                      | 45/422  | 5.12 (4.81–5.29)       | 48/546  | 5.08 (4.95–5.32)      | 0.881            |
| <b>P-selectin</b>               | 45/422  | 4.60 (4.54–4.68)       | 48/546  | 4.60 (4.55–4.66)      | 0.985            |
| <b>PF4</b>                      | 44/422  | 6.87 (6.79–6.97)       | 45/546  | 6.92 (6.87–7.05)      | <b>0.016</b>     |
| <b>PTX3</b>                     | 45/422  | 2.97 (2.80–3.33)       | 48/546  | 3.04 (2.92–3.22)      | 0.758            |
| <b>TAC1</b>                     | 43/422  | 1.20 (0.92–1.28)       | 45/546  | 1.04 (0.91–1.20)      | 0.167            |
| <b>TGF-<math>\beta</math></b>   | 258/422 | 8.01 (7.78–8.15)       | 295/546 | 8.07 (7.71–8.20)      | <b>0.015</b>     |
| <b>TNF-<math>\alpha</math></b>  | 258/422 | 2.95 (2.63–3.15)       | 294/546 | 2.86 (2.63–2.98)      | <b>&lt;0.001</b> |
| <b>TNFR1</b>                    | 194/422 | 3.72 (3.62–3.81)       | 178/546 | 3.63 (3.57–3.71)      | <b>&lt;0.001</b> |
| <b>TNFR2</b>                    | 45/422  | 3.40 (3.19–3.58)       | 48/546  | 3.32 (3.18–3.36)      | <b>0.005</b>     |
| <b>VCAM-1</b>                   | 45/422  | 6.05 (5.95–6.16)       | 48/546  | 5.86 (5.79–5.94)      | <b>&lt;0.001</b> |
| <b>VEGF</b>                     | 45/422  | 1.77 (1.65–2.00)       | 48/546  | 1.84 (1.72–2.10)      | 0.081            |
| <b>VEGF-C</b>                   | 41/422  | 3.00 (2.80–3.16)       | 47/546  | 3.14 (2.92–3.26)      | <b>0.041</b>     |
| <b>VEGFR3</b>                   | 45/422  | 2.14 (1.75–2.36)       | 48/546  | 2.14 (1.86–2.39)      | 0.513            |

Data are presented as medians (interquartile range). In case of missing values, the total number of patients with available data is indicated. All *p* values are derived from non-parametrical Mann-Whitney *U* tests. Statistically significant *p* values are in bold. N/A indicates that the comparison could not be conducted owing to low numbers of observations (*n*<4).

BAFF: B cell activating factor belonging to the tumour necrosis factor ligand family; CCL13: C-C motif chemokine ligand 13; CCL17: C-C motif chemokine ligand 17; CCL18: C-C motif chemokine ligand 18; CCL2: C-C motif chemokine ligand 2; CCL20: C-C motif chemokine ligand 20; CCL3: C-C motif chemokine ligand 3; CCL4: C-C motif chemokine ligand 4; CCL5: C-C motif chemokine ligand 5; CCL7: C-C motif chemokine ligand 7; CCL8: C-C motif chemokine ligand 8; CRP: C-reactive protein; CXCL1: C-X-C motif ligand 1; CXCL10: C-X-C motif ligand 10; CXCL11: C-X-C motif ligand 11; CXCL13: C-X-C motif ligand 13; CXCL16: C-X-C motif ligand 16; CXCL5: C-X-C motif ligand 5; CXCL9: C-X-C motif ligand 9; DcR1: decoy receptor 1; DcR3: decoy receptor 3; EGF: epidermal growth factor; FasL: Fas ligand; FGF2: fibroblast growth factor 2; FGF21: fibroblast growth factor 21; G-CSF: granulocyte colony-stimulating factor; GDF15: growth differentiation factor 15; GH: growth hormone; HC: healthy controls; HGF: hepatocyte growth factor; ICAM-1: intercellular adhesion molecule 1; IFN- $\gamma$ : interferon gamma; IFNGR1: interferon gamma receptor 1; IL-10: interleukin 10; IL-12: interleukin 12; IL-13: interleukin 13; IL-17A: interleukin 17A; IL-17F: interleukin 17F; IL-18BP: interleukin 18 binding protein; IL-1 $\alpha$ : interleukin 1  $\alpha$ ; IL-1 $\beta$ : interleukin 1  $\beta$ ; IL-1R1: interleukin 1 receptor type 1; IL-1R2: interleukin 1 receptor type 2; IL-1RA: interleukin 1 receptor antagonist; IL-2: interleukin 2; IL-22: interleukin 22; IL-23: interleukin 23; IL-27: interleukin 27; IL-28A: interleukin 28A; IL-2R $\alpha$ : interleukin 2 receptor  $\alpha$ ; IL-31: interleukin 31; IL-33: interleukin 33; IL-5: interleukin 5; IL-6: interleukin 6; IL-6R $\alpha$ : interleukin 6 receptor  $\alpha$ ; IL-8: interleukin 8; IL-9: interleukin 9; M-CSF: macrophage colony-stimulating factor; MDC: macrophage-derived chemokine; MIF: macrophage migration inhibitory factor; MMP-1: matrix metalloproteinase 1; MMP-12: matrix metalloproteinase 12; MMP-13: matrix metalloproteinase 13; MMP-2: matrix metalloproteinase 12; MMP-3: matrix metalloproteinase 3; MMP-7: matrix metalloproteinase 7; MMP-8: matrix metalloproteinase 8; MMP-9: matrix metalloproteinase 9; MPO: myeloperoxidase; PF4: platelet factor 4; PTX3: pentraxin 3; SLE: systemic lupus erythematosus; TAC1: transmembrane activator and calcium modulator and cyclophilin ligand interactor; TGF- $\beta$ : transforming growth factor  $\beta$ ; TNF- $\alpha$ : tumour necrosis factor  $\alpha$ ; TNFR1: tumour necrosis factor receptor 1; TNFR2: tumour necrosis factor receptor 2; VCAM-1: vascular cell adhesion protein 1; VEGF: vascular endothelial growth factor; VEGF-C: vascular endothelial growth factor C; VEGFR3: vascular endothelial growth factor receptor 3.

4 **Supplementary Table 3.** Serum levels of selected autoimmunity-associated cytokines in patients with active versus inactive SLE in the PRECISESADS study population

| Cytokines      | Active SLE |                       | Inactive SLE |                        | p value      |
|----------------|------------|-----------------------|--------------|------------------------|--------------|
|                | n/N        | Serum levels (pg/mL)  | n/N          | Serum levels (pg/mL)   |              |
| BAFF           | 230/348    | 6.05 (5.88–6.17)      | 21/45        | 5.90 (5.81–6.10)       | 0.059        |
| CCL13          | 148/348    | 2.15 (2.02–2.28)      | 20/45        | 2.17 (2.02–2.31)       | 0.858        |
| CCL17          | 148/348    | 2.81 (2.62–3.02)      | 20/45        | 2.75 (2.59–2.87)       | 0.374        |
| CCL18          | 31/348     | 4.59 (4.38–4.64)      | 4/45         | 4.71 (4.69–4.73)       | <b>0.027</b> |
| CCL2           | 31/348     | 2.67 (2.51–2.72)      | 4/45         | 2.62 (2.55–2.74)       | 0.980        |
| CCL20          | 31/348     | 1.68 (1.48–1.88)      | 4/45         | 1.64 (1.58–1.72)       | 0.897        |
| CCL3           | 25/348     | 2.27 (2.14–2.41)      | 4/45         | 2.30 (2.22–2.37)       | 0.874        |
| CCL4           | 141/348    | 2.23 (2.08–2.44)      | 19/45        | 2.17 (2.09–2.39)       | 0.525        |
| CCL5           | 31/348     | 4.72 (4.46–4.87)      | 4/45         | 4.61 (4.56–4.68)       | 0.531        |
| CCL7           | 30/348     | 1.99 (1.82–2.23)      | 4/45         | 1.81 (1.73–1.94)       | 0.349        |
| CCL8           | 148/348    | 1.93 (1.76–2.04)      | 20/45        | 1.80 (1.70–1.97)       | 0.102        |
| CRP            | 130/348    | 6.19 (5.75–6.59)      | 16/45        | 5.79 (5.31–6.18)       | <b>0.036</b> |
| CXCL1          | 17/348     | 2.01 (1.83–2.20)      | 2/45         | 2.19 (2.18–2.19)       | N/A          |
| CXCL10         | 148/348    | 1.45 (1.28–1.77)      | 20/45        | 1.33 (1.19–1.51)       | 0.069        |
| CXCL11         | 31/348     | 2.46 (2.32–2.54)      | 4/45         | 2.40 (2.34–2.43)       | 0.337        |
| CXCL13         | 148/348    | 2.03 (1.88–2.27)      | 20/45        | 1.83 (1.75–1.99)       | <b>0.004</b> |
| CXCL16         | 31/348     | 3.11 (3.05–3.17)      | 4/45         | 3.18 (3.14–3.21)       | 0.352        |
| CXCL5          | 31/348     | 3.07 (2.90–3.28)      | 4/45         | 3.27 (3.10–3.42)       | 0.326        |
| CXCL9          | 31/348     | 2.78 (2.68–2.96)      | 4/45         | 2.64 (2.59–2.76)       | 0.276        |
| DcR1           | 31/348     | 3.45 (3.30–3.68)      | 4/45         | 3.42 (3.33–3.53)       | 0.940        |
| DcR3           | 31/348     | 2.63 (2.48–2.73)      | 4/45         | 2.66 (2.48–2.80)       | 0.876        |
| E-selectin     | 31/348     | 4.37 (4.26–4.46)      | 4/45         | 4.37 (4.24–4.48)       | 1.000        |
| EGF            | 31/348     | 2.17 (1.93–2.41)      | 4/45         | 2.37 (2.30–2.45)       | 0.254        |
| Fas            | 31/348     | 3.89 (3.81–4.01)      | 4/45         | 3.93 (3.88–3.99)       | 0.565        |
| FasL           | 148/348    | 1.67 (1.47–1.79)      | 20/45        | 1.59 (1.51–1.64)       | 0.175        |
| FGF2           | 31/348     | 2.16 (2.05–2.28)      | 4/45         | 2.21 (2.18–2.24)       | 0.717        |
| FGF21          | 30/348     | 3.31 (3.01–3.40)      | 4/45         | 3.39 (3.31–3.49)       | 0.262        |
| G-CSF          | 31/348     | 1.46 (1.36–1.54)      | 4/45         | 1.56 (1.50–1.62)       | 0.102        |
| Galactin-3     | 31/348     | 3.91 (3.77–3.99)      | 4/45         | 3.85 (3.81–3.90)       | 0.671        |
| GDF15          | 148/348    | 2.86 (2.70–3.11)      | 20/45        | 2.91 (2.64–3.16)       | 0.881        |
| GH             | 31/348     | 3.49 (3.15–3.70)      | 4/45         | 3.29 (2.99–3.46)       | 0.301        |
| HGF            | 31/348     | 2.25 (2.14–2.40)      | 4/45         | 2.31 (2.08–2.61)       | 0.708        |
| ICAM-1         | 31/348     | 5.39 (5.25–5.66)      | 4/45         | 5.47 (5.32–5.63)       | 0.940        |
| IFN- $\gamma$  | 29/348     | 26.00 (21.99–32.86)   | 3/45         | 30.96 (26.61–31.72)    | N/A          |
| IFNGR1         | 31/348     | 1.91 (1.83–2.00)      | 4/45         | 1.88 (1.87–1.96)       | 0.783        |
| IL-10          | 21/348     | 0.54 (0.17–1.20)      | 2/45         | 0.74 (0.59–0.89)       | N/A          |
| IL-12          | 12/348     | 15.91 (6.58–28.55)    | 1/45         | 0.18 (0.18–0.18)       | N/A          |
| IL-13          | 15/348     | 2.20 (2.01–2.30)      | 3/45         | 2.12 (2.00–2.17)       | N/A          |
| IL-17A         | 16/348     | 1.94 (0.80–3.33)      | 2/45         | 2.04 (1.06–3.01)       | N/A          |
| IL-17F         | 15/348     | 1.30 (0.81–1.56)      | 2/45         | 0.92 (0.79–1.05)       | N/A          |
| IL-18BP        | 31/348     | 2.41 (2.32–2.60)      | 4/45         | 2.32 (2.08–2.56)       | 0.708        |
| IL-1 $\alpha$  | 31/348     | 1.57 (1.47–1.85)      | 4/45         | 1.69 (1.62–1.72)       | 0.531        |
| IL-1 $\beta$   | 22/348     | 4.79 (2.78–7.64)      | 3/45         | 3.75 (3.49–3.88)       | N/A          |
| IL-1R1         | 31/348     | 3.17 (3.03–3.24)      | 4/45         | 3.17 (3.10–3.21)       | 0.940        |
| IL-1R2         | 148/348    | 3.84 (3.75–3.91)      | 20/45        | 3.83 (3.76–3.90)       | 0.908        |
| IL-1RA         | 146/348    | 3.00 (2.89–3.20)      | 20/45        | 2.97 (2.83–3.09)       | 0.053        |
| IL-2           | 19/348     | 1.98 (1.80–2.08)      | 3/45         | 1.95 (1.83–2.02)       | N/A          |
| IL-22          | 5/348      | 1.24 (0.69–1.24)      | 1/45         | 1.28 (1.28–1.28)       | N/A          |
| IL-23          | 31/348     | 2.56 (2.42–2.68)      | 4/45         | 2.74 (2.69–2.75)       | 0.055        |
| IL-27          | 19/348     | 180.41 (82.90–283.65) | 2/45         | 243.83 (231.24–256.42) | N/A          |
| IL-28A         | 17/348     | 2.51 (2.12–2.75)      | 4/45         | 2.13 (1.84–2.44)       | 0.244        |
| IL-2R $\alpha$ | 31/348     | 2.70 (2.60–2.87)      | 4/45         | 2.73 (2.66–2.93)       | 0.783        |

|                                 |         |                        |       |                        |              |
|---------------------------------|---------|------------------------|-------|------------------------|--------------|
| <b>IL-31</b>                    | 25/348  | 2.09 (2.00–2.13)       | 4/45  | 2.13 (2.01–2.24)       | 0.448        |
| <b>IL-33</b>                    | 26/348  | 3.64 (2.34–5.13)       | 3/45  | 3.48 (2.66–4.92)       | N/A          |
| <b>IL-5</b>                     | 29/348  | 3.70 (2.97–4.16)       | 3/45  | 3.75 (3.72–3.96)       | N/A          |
| <b>IL-6</b>                     | 228/348 | 3.34 (2.91–3.64)       | 21/45 | 3.20 (3.03–3.49)       | 0.141        |
| <b>IL-6R<math>\alpha</math></b> | 31/348  | 4.07 (4.01–4.10)       | 4/45  | 4.06 (4.02–4.11)       | 1.000        |
| <b>IL-8</b>                     | 31/348  | 1.26 (1.13–1.40)       | 4/45  | 1.42 (1.40–1.52)       | 0.052        |
| <b>IL-9</b>                     | 6/348   | 287.00 (156.47–405.85) | 1/45  | 736.41 (736.41–736.41) | N/A          |
| <b>M-CSF</b>                    | 10/348  | 55.82 (22.96–65.87)    | 3/45  | 55.62 (46.33–63.61)    | N/A          |
| <b>MDC</b>                      | 31/348  | 2.87 (2.70–2.93)       | 4/45  | 2.87 (2.80–2.96)       | 0.635        |
| <b>MIF</b>                      | 30/348  | 3.75 (3.51–3.88)       | 4/45  | 3.70 (3.53–3.92)       | 0.777        |
| <b>MMP-1</b>                    | 31/348  | 3.31 (3.12–3.47)       | 4/45  | 3.23 (3.14–3.34)       | 0.783        |
| <b>MMP-12</b>                   | 5/348   | 107.31 (98.79–130.23)  | 0/45  | N/A                    | N/A          |
| <b>MMP-13</b>                   | 28/348  | 2.53 (2.39–2.73)       | 4/45  | 2.53 (2.38–2.65)       | 0.588        |
| <b>MMP-2</b>                    | 131/348 | 5.33 (5.25–5.44)       | 17/45 | 5.36 (5.32–5.41)       | 0.200        |
| <b>MMP-3</b>                    | 31/348  | 4.29 (4.10–4.48)       | 4/45  | 3.95 (3.92–4.09)       | 0.064        |
| <b>MMP-7</b>                    | 31/348  | 3.37 (3.13–3.50)       | 4/45  | 3.63 (3.57–3.68)       | <b>0.049</b> |
| <b>MMP-8</b>                    | 147/348 | 3.53 (3.30–3.78)       | 20/45 | 3.47 (3.37–3.63)       | 0.596        |
| <b>MMP-9</b>                    | 31/348  | 5.25 (5.01–5.43)       | 4/45  | 5.22 (5.04–5.43)       | 0.861        |
| <b>MPO</b>                      | 31/348  | 5.11 (4.80–5.22)       | 4/45  | 5.13 (4.87–5.33)       | 0.980        |
| <b>P-selectin</b>               | 31/348  | 4.58 (4.53–4.67)       | 4/45  | 4.70 (4.57–4.81)       | 0.233        |
| <b>PF4</b>                      | 30/348  | 6.87 (6.80–6.98)       | 4/45  | 6.93 (6.88–6.98)       | 0.661        |
| <b>PTX3</b>                     | 31/348  | 2.93 (2.82–3.27)       | 4/45  | 3.07 (2.81–3.35)       | 0.856        |
| <b>TACI</b>                     | 29/348  | 1.21 (0.97–1.28)       | 4/45  | 1.18 (1.01–1.39)       | 0.651        |
| <b>TGF-<math>\beta</math></b>   | 230/348 | 8.03 (7.83–8.15)       | 21/45 | 7.96 (7.78–8.05)       | 0.197        |
| <b>TNF-<math>\alpha</math></b>  | 230/348 | 2.95 (2.67–3.16)       | 21/45 | 2.96 (2.57–3.05)       | 0.124        |
| <b>TNFR1</b>                    | 148/348 | 3.72 (3.62–3.81)       | 20/45 | 3.68 (3.62–3.81)       | 0.605        |
| <b>TNFR2</b>                    | 31/348  | 3.41 (3.22–3.58)       | 4/45  | 3.39 (3.30–3.53)       | 1.000        |
| <b>VCAM-1</b>                   | 31/348  | 6.04 (5.95–6.08)       | 4/45  | 5.92 (5.80–6.12)       | 0.499        |
| <b>VEGF</b>                     | 31/348  | 1.72 (1.63–1.99)       | 4/45  | 1.88 (1.72–2.03)       | 0.352        |
| <b>VEGF-C</b>                   | 28/348  | 2.95 (2.79–3.08)       | 4/45  | 3.17 (3.11–3.20)       | 0.093        |
| <b>VEGFR3</b>                   | 31/348  | 2.14 (1.81–2.35)       | 4/45  | 2.38 (2.18–2.47)       | 0.337        |

Data are presented as medians (interquartile range). In case of missing values, the total number of patients with available data is indicated. All *p* values are derived from non-parametrical Mann-Whitney *U* tests. Statistically significant *p* values are in bold. N/A indicates that the comparison could not be conducted owing to low numbers of observations (*n*<4).

BAFF: B cell activating factor belonging to the tumour necrosis factor ligand family; CCL13: C-C motif chemokine ligand 13; CCL17: C-C motif chemokine ligand 17; CCL18: C-C motif chemokine ligand 18; CCL2: C-C motif chemokine ligand 2; CCL20: C-C motif chemokine ligand 20; CCL3: C-C motif chemokine ligand 3; CCL4: C-C motif chemokine ligand 4; CCL5: C-C motif chemokine ligand 5; CCL7: C-C motif chemokine ligand 7; CCL8: C-C motif chemokine ligand 8; CRP: C-reactive protein; CXCL1: C-X-C motif ligand 1; CXCL10: C-X-C motif ligand 10; CXCL11: C-X-C motif ligand 11; CXCL13: C-X-C motif ligand 13; CXCL16: C-X-C motif ligand 16; CXCL5: C-X-C motif ligand 5; CXCL9: C-X-C motif ligand 9; DcR1: decoy receptor 1; DcR3: decoy receptor 3; EGF: epidermal growth factor; FasL: Fas ligand; FGF2: fibroblast growth factor 2; FGF21: fibroblast growth factor 21; G-CSF: granulocyte colony-stimulating factor; GDF15: growth differentiation factor 15; GH: growth hormone; HGF: hepatocyte growth factor; ICAM-1: intercellular adhesion molecule 1; IFN- $\gamma$ : interferon gamma; IFNGR1: interferon gamma receptor 1; IL-10: interleukin 10; IL-12: interleukin 12; IL-13: interleukin 13; IL-17A: interleukin 17A; IL-17F: interleukin 17F; IL-18BP: interleukin 18 binding protein; IL-1 $\alpha$ : interleukin 1  $\alpha$ ; IL-1 $\beta$ : interleukin 1  $\beta$ ; IL-1R1: interleukin 1 receptor type 1; IL-1R2: interleukin 1 receptor type 2; IL-1RA: interleukin 1 receptor antagonist; IL-2: interleukin 2; IL-22: interleukin 22; IL-23: interleukin 23; IL-27: interleukin 27; IL-28A: interleukin 28A; IL-2R $\alpha$ : interleukin 2 receptor  $\alpha$ ; IL-31: interleukin 31; IL-33: interleukin 33; IL-5: interleukin 5; IL-6: interleukin 6; IL-6R $\alpha$ : interleukin 6 receptor  $\alpha$ ; IL-8: interleukin 8; IL-9: interleukin 9; M-CSF: macrophage colony-stimulating factor; MDC: macrophage-derived chemokine; MIF: macrophage migration inhibitory factor; MMP-1: matrix metalloproteinase 1; MMP-12: matrix metalloproteinase 12; MMP-13: matrix metalloproteinase 13; MMP-2: matrix metalloproteinase 2; MMP-3: matrix metalloproteinase 3; MMP-7: matrix metalloproteinase 7; MMP-8: matrix metalloproteinase 8; MMP-9: matrix metalloproteinase 9; MPO: myeloperoxidase; N/A: not applicable; PF4: platelet factor 4; PTX3: pentraxin 3; SLE: systemic lupus erythematosus; TACI: transmembrane activator and calcium modulator and cyclophilin ligand interactor; TGF- $\beta$ : transforming growth factor  $\beta$ ; TNF- $\alpha$ : tumour necrosis factor  $\alpha$ ; TNFR1: tumour necrosis factor receptor 1; TNFR2: tumour necrosis factor receptor 2; VCAM-1: vascular cell adhesion protein 1; VEGF: vascular endothelial growth factor; VEGF-C: vascular endothelial growth factor C; VEGFR3: vascular endothelial growth factor receptor 3.



**5 Supplementary Table 4.** Serum levels of selected autoimmunity-associated cytokines in patients with active SLE versus healthy controls in the PRECISESADS study population

| Cytokines                       | Active SLE |                       | HC      |                       | p value          |
|---------------------------------|------------|-----------------------|---------|-----------------------|------------------|
|                                 | n/N        | Serum levels (pg/mL)  | n/N     | Serum levels (pg/mL)  |                  |
| <b>BAFF</b>                     | 230/348    | 6.05 (5.88–6.17)      | 295/546 | 5.97 (5.87–6.05)      | <b>&lt;0.001</b> |
| <b>CCL13</b>                    | 148/348    | 2.15 (2.02–2.28)      | 178/546 | 2.15 (2.04–2.26)      | 0.652            |
| <b>CCL17</b>                    | 148/348    | 2.81 (2.62–3.02)      | 178/546 | 2.71 (2.50–2.87)      | <b>&lt;0.001</b> |
| <b>CCL18</b>                    | 31/348     | 4.59 (4.38–4.64)      | 48/546  | 4.49 (4.38–4.55)      | 0.131            |
| <b>CCL2</b>                     | 31/348     | 2.67 (2.51–2.72)      | 48/546  | 2.61 (2.55–2.70)      | 0.463            |
| <b>CCL20</b>                    | 31/348     | 1.68 (1.48–1.88)      | 48/546  | 1.58 (1.46–1.78)      | 0.248            |
| <b>CCL3</b>                     | 25/348     | 2.27 (2.14–2.41)      | 42/546  | 2.30 (2.13–2.46)      | 0.464            |
| <b>CCL4</b>                     | 141/348    | 2.23 (2.08–2.44)      | 160/546 | 2.20 (1.95–2.52)      | 0.404            |
| <b>CCL5</b>                     | 31/348     | 4.72 (4.46–4.87)      | 48/546  | 4.69 (4.55–4.84)      | 0.693            |
| <b>CCL7</b>                     | 30/348     | 1.99 (1.82–2.23)      | 45/546  | 1.93 (1.62–2.21)      | 0.275            |
| <b>CCL8</b>                     | 148/348    | 1.93 (1.76–2.04)      | 178/546 | 1.82 (1.72–1.94)      | <b>&lt;0.001</b> |
| <b>CRP</b>                      | 130/348    | 6.19 (5.75–6.59)      | 143/546 | 5.97 (5.42–6.36)      | <b>0.001</b>     |
| <b>CXCL1</b>                    | 17/348     | 2.01 (1.83–2.20)      | 27/546  | 2.04 (1.91–2.30)      | 0.588            |
| <b>CXCL10</b>                   | 148/348    | 1.45 (1.28–1.77)      | 178/546 | 1.28 (1.13–1.40)      | <b>&lt;0.001</b> |
| <b>CXCL11</b>                   | 31/348     | 2.46 (2.32–2.54)      | 48/546  | 2.36 (2.27–2.46)      | <b>0.031</b>     |
| <b>CXCL13</b>                   | 148/348    | 2.03 (1.88–2.27)      | 175/546 | 1.78 (1.69–1.89)      | <b>&lt;0.001</b> |
| <b>CXCL16</b>                   | 31/348     | 3.11 (3.05–3.17)      | 48/546  | 3.07 (3.02–3.10)      | <b>0.025</b>     |
| <b>CXCL5</b>                    | 31/348     | 3.07 (2.90–3.28)      | 48/546  | 3.15 (3.04–3.38)      | 0.376            |
| <b>CXCL9</b>                    | 31/348     | 2.78 (2.68–2.96)      | 47/546  | 2.78 (2.67–2.86)      | 0.195            |
| <b>DcR1</b>                     | 31/348     | 3.45 (3.30–3.68)      | 48/546  | 3.53 (3.39–3.60)      | 0.753            |
| <b>DcR3</b>                     | 31/348     | 2.63 (2.48–2.73)      | 47/546  | 2.64 (2.48–2.75)      | 0.854            |
| <b>E-selectin</b>               | 31/348     | 4.37 (4.26–4.46)      | 48/546  | 4.38 (4.21–4.50)      | 0.909            |
| <b>EGF</b>                      | 31/348     | 2.17 (1.93–2.41)      | 48/546  | 2.30 (2.04–2.39)      | 0.404            |
| <b>Fas</b>                      | 31/348     | 3.89 (3.81–4.01)      | 48/546  | 3.86 (3.82–3.90)      | 0.213            |
| <b>FasL</b>                     | 148/348    | 1.67 (1.47–1.79)      | 178/546 | 1.62 (1.54–1.73)      | 0.539            |
| <b>FGF2</b>                     | 31/348     | 2.16 (2.05–2.28)      | 48/546  | 2.12 (2.06–2.24)      | 0.511            |
| <b>FGF21</b>                    | 30/348     | 3.31 (3.01–3.40)      | 48/546  | 3.35 (3.17–3.46)      | 0.363            |
| <b>G-CSF</b>                    | 31/348     | 1.46 (1.36–1.54)      | 47/546  | 1.39 (1.31–1.46)      | 0.060            |
| <b>Galactin-3</b>               | 31/348     | 3.91 (3.77–3.99)      | 48/546  | 3.85 (3.78–3.91)      | 0.119            |
| <b>GDF15</b>                    | 148/348    | 2.86 (2.70–3.11)      | 178/546 | 2.70 (2.57–2.84)      | <b>&lt;0.001</b> |
| <b>GH</b>                       | 31/348     | 3.49 (3.15–3.70)      | 48/546  | 3.02 (2.61–3.42)      | <b>0.009</b>     |
| <b>HGF</b>                      | 31/348     | 2.25 (2.14–2.40)      | 48/546  | 2.32 (2.23–2.40)      | 0.185            |
| <b>ICAM-1</b>                   | 31/348     | 5.39 (5.25–5.66)      | 48/546  | 5.40 (5.18–5.52)      | 0.421            |
| <b>IFN-<math>\gamma</math></b>  | 29/348     | 26.00 (21.99–32.86)   | 39/546  | 17.51 (13.79–20.56)   | <b>&lt;0.001</b> |
| <b>IFNGR1</b>                   | 31/348     | 1.91 (1.83–2.00)      | 48/546  | 1.88 (1.79–1.92)      | 0.131            |
| <b>IL-10</b>                    | 21/348     | 0.54 (0.17–1.20)      | 15/546  | 0.28 (0.19–0.56)      | 0.304            |
| <b>IL-12</b>                    | 12/348     | 15.91 (6.58–28.55)    | 19/546  | 14.81 (6.11–30.33)    | 0.823            |
| <b>IL-13</b>                    | 15/348     | 2.20 (2.01–2.30)      | 24/546  | 2.33 (1.89–2.44)      | 0.265            |
| <b>IL-17A</b>                   | 16/348     | 1.94 (0.80–3.33)      | 15/546  | 2.99 (1.86–4.99)      | 0.166            |
| <b>IL-17F</b>                   | 15/348     | 1.30 (0.81–1.56)      | 12/546  | 0.94 (0.25–1.18)      | 0.152            |
| <b>IL-18BP</b>                  | 31/348     | 2.41 (2.32–2.60)      | 48/546  | 2.28 (2.05–2.44)      | <b>0.009</b>     |
| <b>IL-1<math>\alpha</math></b>  | 31/348     | 1.57 (1.47–1.85)      | 48/546  | 1.52 (1.38–1.78)      | 0.163            |
| <b>IL-1<math>\beta</math></b>   | 22/348     | 4.79 (2.78–7.64)      | 31/546  | 3.17 (1.89–4.81)      | <b>0.017</b>     |
| <b>IL-1R1</b>                   | 31/348     | 3.17 (3.03–3.24)      | 48/546  | 3.11 (3.07–3.16)      | 0.269            |
| <b>IL-1R2</b>                   | 148/348    | 3.84 (3.75–3.91)      | 178/546 | 3.83 (3.77–3.89)      | 0.632            |
| <b>IL-1RA</b>                   | 146/348    | 3.00 (2.89–3.20)      | 178/546 | 2.92 (2.78–3.05)      | <b>&lt;0.001</b> |
| <b>IL-2</b>                     | 19/348     | 1.98 (1.80–2.08)      | 28/546  | 1.88 (1.66–2.06)      | 0.313            |
| <b>IL-22</b>                    | 5/348      | 1.24 (0.69–1.24)      | 7/546   | 1.31 (0.84–1.46)      | 0.343            |
| <b>IL-23</b>                    | 31/348     | 2.56 (2.42–2.68)      | 48/546  | 2.56 (2.45–2.65)      | 0.740            |
| <b>IL-27</b>                    | 19/348     | 180.41 (82.90–283.65) | 18/546  | 117.50 (48.72–188.24) | 0.158            |
| <b>IL-28A</b>                   | 17/348     | 2.51 (2.12–2.75)      | 27/546  | 2.05 (1.80–2.16)      | <b>0.006</b>     |
| <b>IL-2R<math>\alpha</math></b> | 31/348     | 2.70 (2.60–2.87)      | 48/546  | 2.63 (2.53–2.72)      | <b>0.014</b>     |

|                                 |         |                        |         |                       |                  |
|---------------------------------|---------|------------------------|---------|-----------------------|------------------|
| <b>IL-31</b>                    | 25/348  | 2.09 (2.00–2.13)       | 43/546  | 2.06 (1.93–2.21)      | 0.884            |
| <b>IL-33</b>                    | 26/348  | 3.64 (2.34–5.13)       | 33/546  | 3.07 (2.25–5.80)      | 0.760            |
| <b>IL-5</b>                     | 29/348  | 3.70 (2.97–4.16)       | 38/546  | 3.90 (3.47–4.50)      | 0.156            |
| <b>IL-6</b>                     | 228/348 | 3.34 (2.91–3.64)       | 290/546 | 3.18 (2.91–3.38)      | <b>&lt;0.001</b> |
| <b>IL-6R<math>\alpha</math></b> | 31/348  | 4.07 (4.01–4.10)       | 48/546  | 4.07 (4.03–4.12)      | 0.791            |
| <b>IL-8</b>                     | 31/348  | 1.26 (1.13–1.40)       | 48/546  | 1.29 (1.20–1.36)      | 0.928            |
| <b>IL-9</b>                     | 6/348   | 287.00 (156.47–405.85) | 6/546   | 263.29 (52.12–558.71) | 0.936            |
| <b>M-CSF</b>                    | 10/348  | 55.82 (22.96–65.87)    | 16/546  | 58.42 (29.66–166.84)  | 0.343            |
| <b>MDC</b>                      | 31/348  | 2.87 (2.70–2.93)       | 48/546  | 2.83 (2.70–2.91)      | 0.433            |
| <b>MIF</b>                      | 30/348  | 3.75 (3.51–3.88)       | 48/546  | 3.60 (3.44–3.83)      | 0.159            |
| <b>MMP-1</b>                    | 31/348  | 3.31 (3.12–3.47)       | 48/546  | 3.30 (3.12–3.45)      | 0.854            |
| <b>MMP-12</b>                   | 5/348   | 107.31 (98.79–130.23)  | 7/546   | 53.62 (35.45–91.67)   | 0.415            |
| <b>MMP-13</b>                   | 28/348  | 2.53 (2.39–2.73)       | 40/546  | 2.54 (2.35–2.60)      | 0.319            |
| <b>MMP-2</b>                    | 131/348 | 5.33 (5.25–5.44)       | 143/546 | 5.35 (5.27–5.44)      | 0.280            |
| <b>MMP-3</b>                    | 31/348  | 4.29 (4.10–4.48)       | 47/546  | 4.09 (3.98–4.19)      | <b>0.001</b>     |
| <b>MMP-7</b>                    | 31/348  | 3.37 (3.13–3.50)       | 48/546  | 3.32 (3.18–3.41)      | 0.498            |
| <b>MMP-8</b>                    | 147/348 | 3.53 (3.30–3.78)       | 178/546 | 3.57 (3.35–3.80)      | 0.212            |
| <b>MMP-9</b>                    | 31/348  | 5.25 (5.01–5.43)       | 48/546  | 5.35 (5.24–5.47)      | <b>0.020</b>     |
| <b>MPO</b>                      | 31/348  | 5.11 (4.80–5.22)       | 48/546  | 5.08 (4.95–5.32)      | 0.784            |
| <b>P-selectin</b>               | 31/348  | 4.58 (4.53–4.67)       | 48/546  | 4.60 (4.55–4.66)      | 0.566            |
| <b>PF4</b>                      | 30/348  | 6.87 (6.80–6.98)       | 45/546  | 6.92 (6.87–7.05)      | 0.060            |
| <b>PTX3</b>                     | 31/348  | 2.93 (2.82–3.27)       | 48/546  | 3.04 (2.92–3.22)      | 0.345            |
| <b>TACI</b>                     | 29/348  | 1.21 (0.97–1.28)       | 45/546  | 1.04 (0.91–1.20)      | 0.115            |
| <b>TGF-<math>\beta</math></b>   | 230/348 | 8.03 (7.83–8.15)       | 295/546 | 8.07 (7.71–8.20)      | 0.060            |
| <b>TNF-<math>\alpha</math></b>  | 230/348 | 2.95 (2.67–3.16)       | 294/546 | 2.86 (2.63–2.98)      | <b>&lt;0.001</b> |
| <b>TNFR1</b>                    | 148/348 | 3.72 (3.62–3.81)       | 178/546 | 3.63 (3.57–3.71)      | <b>&lt;0.001</b> |
| <b>TNFR2</b>                    | 31/348  | 3.41 (3.22–3.58)       | 48/546  | 3.32 (3.18–3.36)      | <b>0.013</b>     |
| <b>VCAM-1</b>                   | 31/348  | 6.04 (5.95–6.08)       | 48/546  | 5.86 (5.79–5.94)      | <b>&lt;0.001</b> |
| <b>VEGF</b>                     | 31/348  | 1.72 (1.63–1.99)       | 48/546  | 1.84 (1.72–2.10)      | 0.054            |
| <b>VEGF-C</b>                   | 28/348  | 2.95 (2.79–3.08)       | 47/546  | 3.14 (2.92–3.26)      | <b>0.013</b>     |
| <b>VEGFR3</b>                   | 31/348  | 2.14 (1.81–2.35)       | 48/546  | 2.14 (1.86–2.39)      | 0.677            |

Data are presented as medians (interquartile range). In case of missing values, the total number of patients with available data is indicated. All *p* values are derived from non-parametrical Mann-Whitney *U* tests. Statistically significant *p* values are in bold. N/A indicates that the comparison could not be conducted owing to low numbers of observations (*n*<4).

BAFF: B cell activating factor belonging to the tumour necrosis factor ligand family; CCL13: C-C motif chemokine ligand 13; CCL17: C-C motif chemokine ligand 17; CCL18: C-C motif chemokine ligand 18; CCL2: C-C motif chemokine ligand 2; CCL20: C-C motif chemokine ligand 20; CCL3: C-C motif chemokine ligand 3; CCL4: C-C motif chemokine ligand 4; CCL5: C-C motif chemokine ligand 5; CCL7: C-C motif chemokine ligand 7; CCL8: C-C motif chemokine ligand 8; CRP: C-reactive protein; CXCL1: C-X-C motif ligand 1; CXCL10: C-X-C motif ligand 10; CXCL11: C-X-C motif ligand 11; CXCL13: C-X-C motif ligand 13; CXCL16: C-X-C motif ligand 16; CXCL5: C-X-C motif ligand 5; CXCL9: C-X-C motif ligand 9; DcR1: decoy receptor 1; DcR3: decoy receptor 3; EGF: epidermal growth factor; FasL: Fas ligand; FGF2: fibroblast growth factor 2; FGF21: fibroblast growth factor 21; G-CSF: granulocyte colony-stimulating factor; GDF15: growth differentiation factor 15; GH: growth hormone; HC: healthy controls; HGF: hepatocyte growth factor; ICAM-1: intercellular adhesion molecule 1; IFN- $\gamma$ : interferon  $\gamma$ ; IFNGR1: interferon  $\gamma$  receptor 1; IL-10: interleukin 10; IL-12: interleukin 12; IL-13: interleukin 13; IL-17A: interleukin 17A; IL-17F: interleukin 17F; IL-18BP: interleukin 18 binding protein; IL-1 $\alpha$ : interleukin 1  $\alpha$ ; IL-1 $\beta$ : interleukin 1  $\beta$ ; IL-1R1: interleukin 1 receptor type 1; IL-1R2: interleukin 1 receptor type 2; IL-1RA: interleukin 1 receptor antagonist; IL-2: interleukin 2; IL-22: interleukin 22; IL-23: interleukin 23; IL-27: interleukin 27; IL-28A: interleukin 28A; IL-2R $\alpha$ : interleukin 2 receptor  $\alpha$ ; IL-31: interleukin 31; IL-33: interleukin 33; IL-5: interleukin 5; IL-6: interleukin 6; IL-6R $\alpha$ : interleukin 6 receptor  $\alpha$ ; IL-8: interleukin 8; IL-9: interleukin 9; M-CSF: macrophage colony-stimulating factor; MDC: macrophage-derived chemokine; MIF: macrophage migration inhibitory factor; MMP-1: matrix metalloproteinase 1; MMP-12: matrix metalloproteinase 12; MMP-13: matrix metalloproteinase 13; MMP-2: matrix metalloproteinase 2; MMP-3: matrix metalloproteinase 3; MMP-7: matrix metalloproteinase 7; MMP-8: matrix metalloproteinase 8; MMP-9: matrix metalloproteinase 9; MPO: myeloperoxidase; N/A: not applicable; PF4: platelet factor 4; PTX3: pentraxin 3; SLE: systemic lupus erythematosus; TACI: transmembrane activator and calcium modulator and cyclophilin ligand interactor; TGF- $\beta$ : transforming growth factor  $\beta$ ; TNF- $\alpha$ : tumour necrosis factor  $\alpha$ ; TNFR1: tumour necrosis factor receptor 1; TNFR2: tumour necrosis factor receptor 2; VCAM-1: vascular cell adhesion protein 1; VEGF: vascular endothelial growth factor; VEGF-C: vascular endothelial growth factor C; VEGFR3: vascular endothelial growth factor receptor 3.

6 **Supplementary Table 5.** Serum levels of selected autoimmunity-associated cytokines in patients with inactive SLE versus healthy controls in the PRECISESADS study population

| Cytokines      | Inactive SLE |                        | HC      |                       | p value      |
|----------------|--------------|------------------------|---------|-----------------------|--------------|
|                | n/N          | Serum levels (pg/mL)   | n/N     | Serum levels (pg/mL)  |              |
| BAFF           | 21/45        | 5.90 (5.81–6.10)       | 295/546 | 5.97 (5.87–6.05)      | 0.685        |
| CCL13          | 20/45        | 2.17 (2.02–2.31)       | 178/546 | 2.15 (2.04–2.26)      | 0.903        |
| CCL17          | 20/45        | 2.75 (2.59–2.87)       | 178/546 | 2.71 (2.50–2.87)      | 0.407        |
| CCL18          | 4/45         | 4.71 (4.69–4.73)       | 48/546  | 4.49 (4.38–4.55)      | <b>0.014</b> |
| CCL2           | 4/45         | 2.62 (2.55–2.74)       | 48/546  | 2.61 (2.55–2.70)      | 0.778        |
| CCL20          | 4/45         | 1.64 (1.58–1.72)       | 48/546  | 1.58 (1.46–1.78)      | 0.492        |
| CCL3           | 4/45         | 2.30 (2.22–2.37)       | 42/546  | 2.30 (2.13–2.46)      | 0.984        |
| CCL4           | 19/45        | 2.17 (2.09–2.39)       | 160/546 | 2.20 (1.95–2.52)      | 0.873        |
| CCL5           | 4/45         | 4.61 (4.56–4.68)       | 48/546  | 4.69 (4.55–4.84)      | 0.455        |
| CCL7           | 4/45         | 1.81 (1.73–1.94)       | 45/546  | 1.93 (1.62–2.21)      | 0.728        |
| CCL8           | 20/45        | 1.80 (1.70–1.97)       | 178/546 | 1.82 (1.72–1.94)      | 0.995        |
| CRP            | 16/45        | 5.79 (5.31–6.18)       | 143/546 | 5.97 (5.42–6.36)      | 0.448        |
| CXCL1          | 2/45         | 2.19 (2.18–2.19)       | 27/546  | 2.04 (1.91–2.30)      | N/A          |
| CXCL10         | 20/45        | 1.33 (1.19–1.51)       | 178/546 | 1.28 (1.13–1.40)      | 0.104        |
| CXCL11         | 4/45         | 2.40 (2.34–2.43)       | 48/546  | 2.36 (2.27–2.46)      | 0.770        |
| CXCL13         | 20/45        | 1.83 (1.75–1.99)       | 175/546 | 1.78 (1.69–1.89)      | 0.150        |
| CXCL16         | 4/45         | 3.18 (3.14–3.21)       | 48/546  | 3.07 (3.02–3.10)      | <b>0.042</b> |
| CXCL5          | 4/45         | 3.27 (3.10–3.42)       | 48/546  | 3.15 (3.04–3.38)      | 0.655        |
| CXCL9          | 4/45         | 2.64 (2.59–2.76)       | 47/546  | 2.78 (2.67–2.86)      | 0.483        |
| DcR1           | 4/45         | 3.42 (3.33–3.53)       | 48/546  | 3.53 (3.39–3.60)      | 0.496        |
| DcR3           | 4/45         | 2.66 (2.48–2.80)       | 47/546  | 2.64 (2.48–2.75)      | 0.726        |
| E-selectin     | 4/45         | 4.37 (4.24–4.48)       | 48/546  | 4.38 (4.21–4.50)      | 0.987        |
| EGF            | 4/45         | 2.37 (2.30–2.45)       | 48/546  | 2.30 (2.04–2.39)      | 0.377        |
| Fas            | 4/45         | 3.93 (3.88–3.99)       | 48/546  | 3.86 (3.82–3.90)      | 0.182        |
| FasL           | 20/45        | 1.59 (1.51–1.64)       | 178/546 | 1.62 (1.54–1.73)      | 0.165        |
| FGF2           | 4/45         | 2.21 (2.18–2.24)       | 48/546  | 2.12 (2.06–2.24)      | 0.243        |
| FGF21          | 4/45         | 3.39 (3.31–3.49)       | 48/546  | 3.35 (3.17–3.46)      | 0.279        |
| G-CSF          | 4/45         | 1.56 (1.50–1.62)       | 47/546  | 1.39 (1.31–1.46)      | <b>0.014</b> |
| Galactin-3     | 4/45         | 3.85 (3.81–3.90)       | 48/546  | 3.85 (3.78–3.91)      | 0.679        |
| GDF15          | 20/45        | 2.91 (2.64–3.16)       | 178/546 | 2.70 (2.57–2.84)      | <b>0.004</b> |
| GH             | 4/45         | 3.29 (2.99–3.46)       | 48/546  | 3.02 (2.61–3.42)      | 0.607        |
| HGF            | 4/45         | 2.31 (2.08–2.61)       | 48/546  | 2.32 (2.23–2.40)      | 0.882        |
| ICAM-1         | 4/45         | 5.47 (5.32–5.63)       | 48/546  | 5.40 (5.18–5.52)      | 0.539        |
| IFN- $\gamma$  | 3/45         | 30.96 (26.61–31.72)    | 39/546  | 17.51 (13.79–20.56)   | N/A          |
| IFNGR1         | 4/45         | 1.88 (1.87–1.96)       | 48/546  | 1.88 (1.79–1.92)      | 0.496        |
| IL-10          | 2/45         | 0.74 (0.59–0.89)       | 15/546  | 0.28 (0.19–0.56)      | N/A          |
| IL-12          | 1/45         | 0.18 (0.18–0.18)       | 19/546  | 14.81 (6.11–30.33)    | N/A          |
| IL-13          | 3/45         | 2.12 (2.00–2.17)       | 24/546  | 2.33 (1.89–2.44)      | N/A          |
| IL-17A         | 2/45         | 2.04 (1.06–3.01)       | 15/546  | 2.99 (1.86–4.99)      | N/A          |
| IL-17F         | 2/45         | 0.92 (0.79–1.05)       | 12/546  | 0.94 (0.25–1.18)      | N/A          |
| IL-18BP        | 4/45         | 2.32 (2.08–2.56)       | 48/546  | 2.28 (2.05–2.44)      | 0.655        |
| IL-1 $\alpha$  | 4/45         | 1.69 (1.62–1.72)       | 48/546  | 1.52 (1.38–1.78)      | 0.328        |
| IL-1 $\beta$   | 3/45         | 3.75 (3.49–3.88)       | 31/546  | 3.17 (1.89–4.81)      | N/A          |
| IL-1R1         | 4/45         | 3.17 (3.10–3.21)       | 48/546  | 3.11 (3.07–3.16)      | 0.435        |
| IL-1R2         | 20/45        | 3.83 (3.76–3.90)       | 178/546 | 3.83 (3.77–3.89)      | 0.941        |
| IL-1RA         | 20/45        | 2.97 (2.83–3.09)       | 178/546 | 2.92 (2.78–3.05)      | 0.600        |
| IL-2           | 3/45         | 1.95 (1.83–2.02)       | 28/546  | 1.88 (1.66–2.06)      | N/A          |
| IL-22          | 1/45         | 1.28 (1.28–1.28)       | 7/546   | 1.31 (0.84–1.46)      | N/A          |
| IL-23          | 4/45         | 2.74 (2.69–2.75)       | 48/546  | 2.56 (2.45–2.65)      | <b>0.048</b> |
| IL-27          | 2/45         | 243.83 (231.24–256.42) | 18/546  | 117.50 (48.72–188.24) | N/A          |
| IL-28A         | 4/45         | 2.13 (1.84–2.44)       | 27/546  | 2.05 (1.80–2.16)      | 0.723        |
| IL-2R $\alpha$ | 4/45         | 2.73 (2.66–2.93)       | 48/546  | 2.63 (2.53–2.72)      | 0.219        |

|                                 |       |                        |         |                       |              |
|---------------------------------|-------|------------------------|---------|-----------------------|--------------|
| <b>IL-31</b>                    | 4/45  | 2.13 (2.01–2.24)       | 43/546  | 2.06 (1.93–2.21)      | 0.634        |
| <b>IL-33</b>                    | 3/45  | 3.48 (2.66–4.92)       | 33/546  | 3.07 (2.25–5.80)      | N/A          |
| <b>IL-5</b>                     | 3/45  | 3.75 (3.72–3.96)       | 38/546  | 3.90 (3.47–4.50)      | N/A          |
| <b>IL-6</b>                     | 21/45 | 3.20 (3.03–3.49)       | 290/546 | 3.18 (2.91–3.38)      | 0.568        |
| <b>IL-6R<math>\alpha</math></b> | 4/45  | 4.06 (4.02–4.11)       | 48/546  | 4.07 (4.03–4.12)      | 0.855        |
| <b>IL-8</b>                     | 4/45  | 1.42 (1.40–1.52)       | 48/546  | 1.29 (1.20–1.36)      | <b>0.009</b> |
| <b>IL-9</b>                     | 1/45  | 736.41 (736.41–736.41) | 6/546   | 263.29 (52.12–558.71) | N/A          |
| <b>M-CSF</b>                    | 3/45  | 55.62 (46.33–63.61)    | 16/546  | 58.42 (29.66–166.84)  | N/A          |
| <b>MDC</b>                      | 4/45  | 2.87 (2.80–2.96)       | 48/546  | 2.83 (2.70–2.91)      | 0.396        |
| <b>MIF</b>                      | 4/45  | 3.70 (3.53–3.92)       | 48/546  | 3.60 (3.44–3.83)      | 0.539        |
| <b>MMP-1</b>                    | 4/45  | 3.23 (3.14–3.34)       | 48/546  | 3.30 (3.12–3.45)      | 0.753        |
| <b>MMP-12</b>                   | 0/45  | N/A                    | 7/546   | 53.62 (35.45–91.67)   | N/A          |
| <b>MMP-13</b>                   | 4/45  | 2.53 (2.38–2.65)       | 40/546  | 2.54 (2.35–2.60)      | 0.854        |
| <b>MMP-2</b>                    | 17/45 | 5.36 (5.32–5.41)       | 143/546 | 5.35 (5.27–5.44)      | 0.482        |
| <b>MMP-3</b>                    | 4/45  | 3.95 (3.92–4.09)       | 47/546  | 4.09 (3.98–4.19)      | 0.386        |
| <b>MMP-7</b>                    | 4/45  | 3.63 (3.57–3.68)       | 48/546  | 3.32 (3.18–3.41)      | <b>0.008</b> |
| <b>MMP-8</b>                    | 20/45 | 3.47 (3.37–3.63)       | 178/546 | 3.57 (3.35–3.80)      | 0.280        |
| <b>MMP-9</b>                    | 4/45  | 5.22 (5.04–5.43)       | 48/546  | 5.35 (5.24–5.47)      | 0.396        |
| <b>MPO</b>                      | 4/45  | 5.13 (4.87–5.33)       | 48/546  | 5.08 (4.95–5.32)      | 0.882        |
| <b>P-selectin</b>               | 4/45  | 4.70 (4.57–4.81)       | 48/546  | 4.60 (4.55–4.66)      | 0.377        |
| <b>PF4</b>                      | 4/45  | 6.93 (6.88–6.98)       | 45/546  | 6.92 (6.87–7.05)      | 0.738        |
| <b>PTX3</b>                     | 4/45  | 3.07 (2.81–3.35)       | 48/546  | 3.04 (2.92–3.22)      | 0.959        |
| <b>TACI</b>                     | 4/45  | 1.18 (1.01–1.39)       | 45/546  | 1.04 (0.91–1.20)      | 0.315        |
| <b>TGF-<math>\beta</math></b>   | 21/45 | 7.96 (7.78–8.05)       | 295/546 | 8.07 (7.71–8.20)      | 0.043        |
| <b>TNF-<math>\alpha</math></b>  | 21/45 | 2.96 (2.57–3.05)       | 294/546 | 2.86 (2.63–2.98)      | 0.669        |
| <b>TNFR1</b>                    | 20/45 | 3.68 (3.62–3.81)       | 178/546 | 3.63 (3.57–3.71)      | <b>0.034</b> |
| <b>TNFR2</b>                    | 4/45  | 3.39 (3.30–3.53)       | 48/546  | 3.32 (3.18–3.36)      | 0.292        |
| <b>VCAM-1</b>                   | 4/45  | 5.92 (5.80–6.12)       | 48/546  | 5.86 (5.79–5.94)      | 0.518        |
| <b>VEGF</b>                     | 4/45  | 1.88 (1.72–2.03)       | 48/546  | 1.84 (1.72–2.10)      | 0.855        |
| <b>VEGF-C</b>                   | 4/45  | 3.17 (3.11–3.20)       | 47/546  | 3.14 (2.92–3.26)      | 0.723        |
| <b>VEGFR3</b>                   | 4/45  | 2.38 (2.18–2.47)       | 48/546  | 2.14 (1.86–2.39)      | 0.420        |

Data are presented as medians (interquartile range). In case of missing values, the total number of patients with available data is indicated. All *p* values are derived from non-parametrical Mann-Whitney *U* tests. Statistically significant *p* values are in bold. N/A indicates that the comparison could not be conducted owing to low numbers of observations (*n*<4).

BAFF: B cell activating factor belonging to the tumour necrosis factor ligand family; CCL13: C-C motif chemokine ligand 13; CCL17: C-C motif chemokine ligand 17; CCL18: C-C motif chemokine ligand 18; CCL2: C-C motif chemokine ligand 2; CCL20: C-C motif chemokine ligand 20; CCL3: C-C motif chemokine ligand 3; CCL4: C-C motif chemokine ligand 4; CCL5: C-C motif chemokine ligand 5; CCL7: C-C motif chemokine ligand 7; CCL8: C-C motif chemokine ligand 8; CRP: C-reactive protein; CXCL1: C-X-C motif ligand 1; CXCL10: C-X-C motif ligand 10; CXCL11: C-X-C motif ligand 11; CXCL13: C-X-C motif ligand 13; CXCL16: C-X-C motif ligand 16; CXCL5: C-X-C motif ligand 5; CXCL9: C-X-C motif ligand 9; DcR1: decoy receptor 1; DcR3: decoy receptor 3; EGF: epidermal growth factor; FasL: Fas ligand; FGF2: fibroblast growth factor 2; FGF21: fibroblast growth factor 21; G-CSF: granulocyte colony-stimulating factor; GDF15: growth differentiation factor 15; GH: growth hormone; HC: healthy controls; HGF: hepatocyte growth factor; ICAM-1: intercellular adhesion molecule 1; IFN- $\gamma$ : interferon  $\gamma$ ; IFNGR1: interferon  $\gamma$  receptor 1; IL-10: interleukin 10; IL-12: interleukin 12; IL-13: interleukin 13; IL-17A: interleukin 17A; IL-17F: interleukin 17F; IL-18BP: interleukin 18 binding protein; IL-1 $\alpha$ : interleukin 1  $\alpha$ ; IL-1 $\beta$ : interleukin 1  $\beta$ ; IL-1R1: interleukin 1 receptor type 1; IL-1R2: interleukin 1 receptor type 2; IL-1RA: interleukin 1 receptor antagonist; IL-2: interleukin 2; IL-22: interleukin 22; IL-23: interleukin 23; IL-27: interleukin 27; IL-28A: interleukin 28A; IL-2R $\alpha$ : interleukin 2 receptor  $\alpha$ ; IL-31: interleukin 31; IL-33: interleukin 33; IL-5: interleukin 5; IL-6: interleukin 6; IL-6R $\alpha$ : interleukin 6 receptor  $\alpha$ ; IL-8: interleukin 8; IL-9: interleukin 9; M-CSF: macrophage colony-stimulating factor; MDC: macrophage-derived chemokine; MIF: macrophage migration inhibitory factor; MMP-1: matrix metalloproteinase 1; MMP-12: matrix metalloproteinase 12; MMP-13: matrix metalloproteinase 13; MMP-2: matrix metalloproteinase 2; MMP-3: matrix metalloproteinase 3; MMP-7: matrix metalloproteinase 7; MMP-8: matrix metalloproteinase 8; MMP-9: matrix metalloproteinase 9; MPO: myeloperoxidase; N/A: not applicable; PF4: platelet factor 4; PTX3: pentraxin 3; SLE: systemic lupus erythematosus; TACI: transmembrane activator and calcium modulator and cyclophilin ligand interactor; TGF- $\beta$ : transforming growth factor  $\beta$ ; TNF- $\alpha$ : tumour necrosis factor  $\alpha$ ; TNFR1: tumour necrosis factor receptor 1; TNFR2: tumour necrosis factor receptor 2; VCAM-1: vascular cell adhesion protein 1; VEGF: vascular endothelial growth factor; VEGF-C: vascular endothelial growth factor C; VEGFR3: vascular endothelial growth factor receptor 3.

7 **Supplementary Table 6.** Serum levels of selected autoimmunity-associated cytokines in patients with autoimmune diseases\* versus healthy controls in the PRECISESADS study population

| Cytokines     | AID      |                       | HC      |                       | p value |
|---------------|----------|-----------------------|---------|-----------------------|---------|
|               | n/N      | Serum levels (pg/mL)  | n/N     | Serum levels (pg/mL)  |         |
| BAFF          | 735/1223 | 6.02 (5.89–6.13)      | 295/546 | 5.97 (5.87–6.05)      | <0.001  |
| CCL13         | 707/1223 | 2.19 (2.07–2.34)      | 178/546 | 2.15 (2.04–2.26)      | 0.013   |
| CCL17         | 705/1223 | 2.80 (2.58–2.99)      | 178/546 | 2.71 (2.50–2.87)      | <0.001  |
| CCL18         | 158/1223 | 4.66 (4.51–4.75)      | 48/546  | 4.49 (4.38–4.55)      | <0.001  |
| CCL2          | 158/1223 | 2.66 (2.56–2.79)      | 48/546  | 2.61 (2.55–2.70)      | 0.027   |
| CCL20         | 158/1223 | 1.71 (1.51–1.91)      | 48/546  | 1.58 (1.46–1.78)      | 0.024   |
| CCL3          | 139/1223 | 2.32 (2.20–2.49)      | 42/546  | 2.30 (2.13–2.46)      | 0.626   |
| CCL4          | 640/1223 | 2.17 (2.02–2.54)      | 160/546 | 2.20 (1.95–2.52)      | 0.717   |
| CCL5          | 158/1223 | 4.66 (4.54–4.78)      | 48/546  | 4.69 (4.55–4.84)      | 0.511   |
| CCL7          | 157/1223 | 2.07 (1.85–2.31)      | 45/546  | 1.93 (1.62–2.21)      | 0.046   |
| CCL8          | 707/1223 | 1.88 (1.73–2.01)      | 178/546 | 1.82 (1.72–1.94)      | 0.004   |
| CRP           | 602/1223 | 6.22 (5.75–6.58)      | 143/546 | 5.97 (5.42–6.36)      | <0.001  |
| CXCL1         | 91/1223  | 2.17 (2.00–2.32)      | 27/546  | 2.04 (1.91–2.30)      | 0.176   |
| CXCL10        | 707/1223 | 1.45 (1.25–1.68)      | 178/546 | 1.28 (1.13–1.40)      | <0.001  |
| CXCL11        | 158/1223 | 2.45 (2.36–2.54)      | 48/546  | 2.36 (2.27–2.46)      | <0.001  |
| CXCL13        | 705/1223 | 1.95 (1.78–2.10)      | 175/546 | 1.78 (1.69–1.89)      | <0.001  |
| CXCL16        | 158/1223 | 3.05 (2.99–3.13)      | 48/546  | 3.07 (3.02–3.10)      | 0.606   |
| CXCL5         | 158/1223 | 3.17 (3.02–3.33)      | 48/546  | 3.15 (3.04–3.38)      | 0.917   |
| CXCL9         | 149/1223 | 2.85 (2.75–2.96)      | 47/546  | 2.78 (2.67–2.86)      | 0.001   |
| DcR1          | 158/1223 | 3.51 (3.37–3.67)      | 48/546  | 3.53 (3.39–3.60)      | 0.990   |
| DcR3          | 157/1223 | 2.72 (2.58–2.91)      | 47/546  | 2.64 (2.48–2.75)      | 0.001   |
| E-selectin    | 158/1223 | 4.40 (4.27–4.52)      | 48/546  | 4.38 (4.21–4.50)      | 0.182   |
| EGF           | 158/1223 | 2.23 (2.04–2.36)      | 48/546  | 2.30 (2.04–2.39)      | 0.339   |
| Fas           | 158/1223 | 3.89 (3.77–3.97)      | 48/546  | 3.86 (3.82–3.90)      | 0.218   |
| FasL          | 704/1223 | 1.60 (1.45–1.73)      | 178/546 | 1.62 (1.54–1.73)      | 0.006   |
| FGF2          | 158/1223 | 2.15 (2.07–2.28)      | 48/546  | 2.12 (2.06–2.24)      | 0.255   |
| FGF21         | 157/1223 | 3.41 (3.30–3.53)      | 48/546  | 3.35 (3.17–3.46)      | 0.003   |
| G-CSF         | 155/1223 | 1.48 (1.36–1.58)      | 47/546  | 1.39 (1.31–1.46)      | 0.001   |
| Galactin-3    | 158/1223 | 3.90 (3.83–3.98)      | 48/546  | 3.85 (3.78–3.91)      | 0.005   |
| GDF15         | 705/1223 | 3.00 (2.80–3.19)      | 178/546 | 2.70 (2.57–2.84)      | <0.001  |
| GH            | 157/1223 | 3.10 (2.72–3.52)      | 48/546  | 3.02 (2.61–3.42)      | 0.516   |
| HGF           | 158/1223 | 2.35 (2.24–2.48)      | 48/546  | 2.32 (2.23–2.40)      | 0.116   |
| ICAM-1        | 158/1223 | 5.34 (5.18–5.60)      | 48/546  | 5.40 (5.18–5.52)      | 0.926   |
| IFN- $\gamma$ | 111/1223 | 21.99 (15.85–30.58)   | 39/546  | 17.51 (13.79–20.56)   | 0.002   |
| IFNGR1        | 158/1223 | 1.87 (1.80–1.97)      | 48/546  | 1.88 (1.79–1.92)      | 0.445   |
| IL-10         | 65/1223  | 0.48 (0.20–0.84)      | 15/546  | 0.28 (0.19–0.56)      | 0.333   |
| IL-12         | 53/1223  | 35.22 (18.86–70.29)   | 19/546  | 14.81 (6.11–30.33)    | 0.001   |
| IL-13         | 72/1223  | 2.30 (2.12–2.44)      | 24/546  | 2.33 (1.89–2.44)      | 0.741   |
| IL-17A        | 57/1223  | 2.28 (0.67–4.96)      | 15/546  | 2.99 (1.86–4.99)      | 0.375   |
| IL-17F        | 50/1223  | 1.02 (0.52–1.35)      | 12/546  | 0.94 (0.25–1.18)      | 0.418   |
| IL-18BP       | 158/1223 | 2.49 (2.24–2.62)      | 48/546  | 2.28 (2.05–2.44)      | <0.001  |
| IL-1 $\alpha$ | 158/1223 | 1.56 (1.43–1.81)      | 48/546  | 1.52 (1.38–1.78)      | 0.204   |
| IL-1 $\beta$  | 84/1223  | 3.21 (1.85–4.88)      | 31/546  | 3.17 (1.89–4.81)      | 0.564   |
| IL-1R1        | 158/1223 | 3.12 (3.03–3.18)      | 48/546  | 3.11 (3.07–3.16)      | 0.687   |
| IL-1R2        | 707/1223 | 3.81 (3.73–3.89)      | 178/546 | 3.83 (3.77–3.89)      | 0.008   |
| IL-1RA        | 707/1223 | 2.96 (2.82–3.12)      | 178/546 | 2.92 (2.78–3.05)      | 0.011   |
| IL-2          | 115/1223 | 1.99 (1.82–2.13)      | 28/546  | 1.88 (1.66–2.06)      | 0.083   |
| IL-22         | 30/1223  | 1.46 (0.99–1.72)      | 7/546   | 1.31 (0.84–1.46)      | 0.506   |
| IL-23         | 158/1223 | 2.58 (2.45–2.70)      | 48/546  | 2.56 (2.45–2.65)      | 0.259   |
| IL-27         | 32/1223  | 161.14 (62.70–211.88) | 18/546  | 117.50 (48.72–188.24) | 0.467   |
| IL-28A        | 91/1223  | 2.12 (1.80–2.56)      | 27/546  | 2.05 (1.80–2.16)      | 0.177   |

|                                 |          |                         |         |                       |                  |
|---------------------------------|----------|-------------------------|---------|-----------------------|------------------|
| <b>IL-2R<math>\alpha</math></b> | 158/1223 | 2.73 (2.60–2.86)        | 48/546  | 2.63 (2.53–2.72)      | <b>&lt;0.001</b> |
| <b>IL-31</b>                    | 145/1223 | 2.06 (1.95–2.18)        | 43/546  | 2.06 (1.93–2.21)      | 0.905            |
| <b>IL-33</b>                    | 109/1223 | 6.13 (2.89–12.73)       | 33/546  | 3.07 (2.25–5.80)      | <b>0.004</b>     |
| <b>IL-5</b>                     | 111/1223 | 3.78 (2.88–4.61)        | 38/546  | 3.90 (3.47–4.50)      | 0.275            |
| <b>IL-6</b>                     | 730/1223 | 3.42 (3.06–3.72)        | 290/546 | 3.18 (2.91–3.38)      | <b>&lt;0.001</b> |
| <b>IL-6R<math>\alpha</math></b> | 158/1223 | 4.08 (4.03–4.13)        | 48/546  | 4.07 (4.03–4.12)      | 0.444            |
| <b>IL-8</b>                     | 158/1223 | 1.34 (1.22–1.48)        | 48/546  | 1.29 (1.20–1.36)      | <b>0.007</b>     |
| <b>IL-9</b>                     | 33/1223  | 470.60 (241.68–1432.94) | 6/546   | 263.29 (52.12–558.71) | 0.302            |
| <b>M-CSF</b>                    | 60/1223  | 104.13 (43.40–172.14)   | 16/546  | 58.42 (29.66–166.84)  | 0.268            |
| <b>MDC</b>                      | 158/1223 | 2.86 (2.74–2.95)        | 48/546  | 2.83 (2.70–2.91)      | 0.190            |
| <b>MIF</b>                      | 157/1223 | 3.75 (3.58–3.95)        | 48/546  | 3.60 (3.44–3.83)      | <b>&lt;0.001</b> |
| <b>MMP-1</b>                    | 158/1223 | 3.41 (3.25–3.59)        | 48/546  | 3.30 (3.12–3.45)      | <b>0.009</b>     |
| <b>MMP-12</b>                   | 20/1223  | 103.16 (49.27–157.49)   | 7/546   | 53.62 (35.45–91.67)   | 0.280            |
| <b>MMP-13</b>                   | 128/1223 | 2.51 (2.33–2.65)        | 40/546  | 2.54 (2.35–2.60)      | 0.874            |
| <b>MMP-2</b>                    | 605/1223 | 5.35 (5.27–5.44)        | 143/546 | 5.35 (5.27–5.44)      | 0.792            |
| <b>MMP-3</b>                    | 158/1223 | 4.14 (3.95–4.37)        | 47/546  | 4.09 (3.98–4.19)      | 0.167            |
| <b>MMP-7</b>                    | 157/1223 | 3.46 (3.32–3.65)        | 48/546  | 3.32 (3.18–3.41)      | <b>&lt;0.001</b> |
| <b>MMP-8</b>                    | 705/1223 | 3.49 (3.25–3.76)        | 178/546 | 3.57 (3.35–3.80)      | <b>0.012</b>     |
| <b>MMP-9</b>                    | 158/1223 | 5.31 (5.12–5.53)        | 48/546  | 5.35 (5.24–5.47)      | 0.262            |
| <b>MPO</b>                      | 158/1223 | 5.11 (4.87–5.31)        | 48/546  | 5.08 (4.95–5.32)      | 0.710            |
| <b>P-selectin</b>               | 158/1223 | 4.56 (4.46–4.65)        | 48/546  | 4.60 (4.55–4.66)      | 0.053            |
| <b>PF4</b>                      | 156/1223 | 6.95 (6.85–7.05)        | 45/546  | 6.92 (6.87–7.05)      | 0.888            |
| <b>PTX3</b>                     | 158/1223 | 3.01 (2.83–3.24)        | 48/546  | 3.04 (2.92–3.22)      | 0.669            |
| <b>TAC1</b>                     | 149/1223 | 1.04 (0.85–1.21)        | 45/546  | 1.04 (0.91–1.20)      | 0.941            |
| <b>TGF-<math>\beta</math></b>   | 735/1223 | 8.00 (7.52–8.17)        | 295/546 | 8.07 (7.71–8.20)      | <b>0.002</b>     |
| <b>TNF-<math>\alpha</math></b>  | 734/1223 | 2.96 (2.65–3.14)        | 294/546 | 2.86 (2.63–2.98)      | <b>&lt;0.001</b> |
| <b>TNFR1</b>                    | 707/1223 | 3.69 (3.60–3.79)        | 178/546 | 3.63 (3.57–3.71)      | <b>&lt;0.001</b> |
| <b>TNFR2</b>                    | 157/1223 | 3.35 (3.21–3.55)        | 48/546  | 3.32 (3.18–3.36)      | <b>0.009</b>     |
| <b>VCAM-1</b>                   | 158/1223 | 5.99 (5.86–6.12)        | 48/546  | 5.86 (5.79–5.94)      | <b>&lt;0.001</b> |
| <b>VEGF</b>                     | 158/1223 | 1.94 (1.71–2.07)        | 48/546  | 1.84 (1.72–2.10)      | 0.811            |
| <b>VEGF-C</b>                   | 151/1223 | 2.94 (2.73–3.13)        | 47/546  | 3.14 (2.92–3.26)      | <b>0.001</b>     |
| <b>VEGFR3</b>                   | 158/1223 | 2.00 (1.63–2.31)        | 48/546  | 2.14 (1.86–2.39)      | <b>0.018</b>     |

Data are presented as medians (interquartile range). In case of missing values, the total number of patients with available data is indicated. All *p* values are derived from non-parametrical Mann-Whitney *U* tests. Statistically significant *p* values are in bold.

BAFF: B cell activating factor belonging to the tumour necrosis factor ligand family; CCL13: C-C motif chemokine ligand 13; CCL17: C-C motif chemokine ligand 17; CCL18: C-C motif chemokine ligand 18; CCL2: C-C motif chemokine ligand 2; CCL20: C-C motif chemokine ligand 20; CCL3: C-C motif chemokine ligand 3; CCL4: C-C motif chemokine ligand 4; CCL5: C-C motif chemokine ligand 5; CCL7: C-C motif chemokine ligand 7; CCL8: C-C motif chemokine ligand 8; CRP: C-reactive protein; CXCL1: C-X-C motif ligand 1; CXCL10: C-X-C motif ligand 10; CXCL11: C-X-C motif ligand 11; CXCL13: C-X-C motif ligand 13; CXCL16: C-X-C motif ligand 16; CXCL5: C-X-C motif ligand 5; CXCL9: C-X-C motif ligand 9; DcR1: decoy receptor 1; DcR3: decoy receptor 3; EGF: epidermal growth factor; FasL: Fas ligand; FGF2: fibroblast growth factor 2; FGF21: fibroblast growth factor 21; G-CSF: granulocyte colony-stimulating factor; GDF15: growth differentiation factor 15; GH: growth hormone; HC: healthy controls; HGF: hepatocyte growth factor; ICAM-1: intercellular adhesion molecule 1; IFN- $\gamma$ : interferon  $\gamma$ ; IFNGR1: interferon  $\gamma$  receptor 1; IL-10: interleukin 10; IL-12: interleukin 12; IL-13: interleukin 13; IL-17A: interleukin 17A; IL-17F: interleukin 17F; IL-18BP: interleukin 18 binding protein; IL-1 $\alpha$ : interleukin 1  $\alpha$ ; IL-1 $\beta$ : interleukin 1  $\beta$ ; IL-1R1: interleukin 1 receptor type 1; IL-1R2: interleukin 1 receptor type 2; IL-1RA: interleukin 1 receptor antagonist; IL-2: interleukin 2; IL-22: interleukin 22; IL-23: interleukin 23; IL-27: interleukin 27; IL-28A: interleukin 28A; IL-2R $\alpha$ : interleukin 2 receptor  $\alpha$ ; IL-31: interleukin 31; IL-33: interleukin 33; IL-5: interleukin 5; IL-6: interleukin 6; IL-6R $\alpha$ : interleukin 6 receptor  $\alpha$ ; IL-8: interleukin 8; IL-9: interleukin 9; M-CSF: macrophage colony-stimulating factor; MDC: macrophage-derived chemokine; MIF: macrophage migration inhibitory factor; MMP-1: matrix metalloproteinase 1; MMP-12: matrix metalloproteinase 12; MMP-13: matrix metalloproteinase 13; MMP-2: matrix metalloproteinase 2; MMP-3: matrix metalloproteinase 3; MMP-7: matrix metalloproteinase 7; MMP-8: matrix metalloproteinase 8; MMP-9: matrix metalloproteinase 9; MPO: myeloperoxidase; PF4: platelet factor 4; PTX3: pentraxin 3; TAC1: transmembrane activator and calcium modulator and cyclophilin ligand interactor; TGF- $\beta$ : transforming growth factor  $\beta$ ; TNF- $\alpha$ : tumour necrosis factor  $\alpha$ ; TNFR1: tumour necrosis factor receptor 1; TNFR2: tumour necrosis factor receptor 2; VCAM-1: vascular cell adhesion protein 1; VEGF: vascular endothelial growth factor; VEGF-C: vascular endothelial growth factor C; VEGFR3: vascular endothelial growth factor receptor 3.

\* Mixed connective tissue disease, primary antiphospholipid syndrome, primary Sjögren's syndrome, rheumatoid arthritis, and systemic sclerosis.

**8 Supplementary Table 7.** Serum levels of selected autoimmunity-associated cytokines in patients with SLE versus other autoimmune diseases\* in the PRECISESADS study population

| Cytokines                       | SLE     |                       | AID      |                       | p value          |
|---------------------------------|---------|-----------------------|----------|-----------------------|------------------|
|                                 | n/N     | Serum levels (pg/mL)  | n/N      | Serum levels (pg/mL)  |                  |
| <b>BAFF</b>                     | 258/422 | 6.04 (5.84–6.17)      | 735/1223 | 6.02 (5.89–6.13)      | 0.176            |
| <b>CCL13</b>                    | 194/422 | 2.16 (2.01–2.27)      | 707/1223 | 2.19 (2.07–2.34)      | <b>0.001</b>     |
| <b>CCL17</b>                    | 194/422 | 2.80 (2.62–3.02)      | 705/1223 | 2.80 (2.58–2.99)      | 0.562            |
| <b>CCL18</b>                    | 45/422  | 4.60 (4.49–4.68)      | 158/1223 | 4.66 (4.51–4.75)      | <b>0.046</b>     |
| <b>CCL2</b>                     | 45/422  | 2.65 (2.50–2.71)      | 158/1223 | 2.66 (2.56–2.79)      | 0.088            |
| <b>CCL20</b>                    | 45/422  | 1.68 (1.48–1.86)      | 158/1223 | 1.71 (1.51–1.91)      | 0.404            |
| <b>CCL3</b>                     | 38/422  | 2.31 (2.15–2.47)      | 139/1223 | 2.32 (2.20–2.49)      | 0.500            |
| <b>CCL4</b>                     | 184/422 | 2.23 (2.08–2.49)      | 640/1223 | 2.17 (2.02–2.54)      | 0.179            |
| <b>CCL5</b>                     | 45/422  | 4.67 (4.46–4.81)      | 158/1223 | 4.66 (4.54–4.78)      | 0.833            |
| <b>CCL7</b>                     | 44/422  | 1.99 (1.81–2.30)      | 157/1223 | 2.07 (1.85–2.31)      | 0.573            |
| <b>CCL8</b>                     | 194/422 | 1.92 (1.76–2.05)      | 707/1223 | 1.88 (1.73–2.01)      | <b>0.007</b>     |
| <b>CRP</b>                      | 162/422 | 6.16 (5.61–6.57)      | 602/1223 | 6.22 (5.75–6.58)      | 0.468            |
| <b>CXCL1</b>                    | 25/422  | 2.09 (1.94–2.20)      | 91/1223  | 2.17 (2.00–2.32)      | 0.155            |
| <b>CXCL10</b>                   | 194/422 | 1.45 (1.29–1.77)      | 707/1223 | 1.45 (1.25–1.68)      | 0.125            |
| <b>CXCL11</b>                   | 45/422  | 2.46 (2.29–2.55)      | 158/1223 | 2.45 (2.36–2.54)      | 0.826            |
| <b>CXCL13</b>                   | 194/422 | 2.02 (1.85–2.24)      | 705/1223 | 1.95 (1.78–2.10)      | <b>&lt;0.001</b> |
| <b>CXCL16</b>                   | 45/422  | 3.11 (3.04–3.19)      | 158/1223 | 3.05 (2.99–3.13)      | <b>0.001</b>     |
| <b>CXCL5</b>                    | 45/422  | 3.06 (2.87–3.27)      | 158/1223 | 3.17 (3.02–3.33)      | <b>0.040</b>     |
| <b>CXCL9</b>                    | 45/422  | 2.78 (2.67–3.00)      | 149/1223 | 2.85 (2.75–2.96)      | 0.197            |
| <b>DcR1</b>                     | 45/422  | 3.47 (3.33–3.64)      | 158/1223 | 3.51 (3.37–3.67)      | 0.610            |
| <b>DcR3</b>                     | 45/422  | 2.64 (2.49–2.73)      | 157/1223 | 2.72 (2.58–2.91)      | <b>0.018</b>     |
| <b>E-selectin</b>               | 45/422  | 4.40 (4.26–4.49)      | 158/1223 | 4.40 (4.27–4.52)      | 0.386            |
| <b>EGF</b>                      | 45/422  | 2.27 (2.06–2.44)      | 158/1223 | 2.23 (2.04–2.36)      | 0.462            |
| <b>Fas</b>                      | 45/422  | 3.89 (3.83–4.02)      | 158/1223 | 3.89 (3.77–3.97)      | 0.162            |
| <b>FasL</b>                     | 194/422 | 1.65 (1.49–1.78)      | 704/1223 | 1.60 (1.45–1.73)      | <b>0.004</b>     |
| <b>FGF2</b>                     | 45/422  | 2.18 (2.06–2.26)      | 158/1223 | 2.15 (2.07–2.28)      | 0.889            |
| <b>FGF21</b>                    | 44/422  | 3.33 (3.18–3.45)      | 157/1223 | 3.41 (3.30–3.53)      | <b>0.004</b>     |
| <b>G-CSF</b>                    | 45/422  | 1.48 (1.41–1.55)      | 155/1223 | 1.48 (1.36–1.58)      | 0.917            |
| <b>Galactin-3</b>               | 45/422  | 3.89 (3.79–3.98)      | 158/1223 | 3.90 (3.83–3.98)      | 0.714            |
| <b>GDF15</b>                    | 194/422 | 2.89 (2.70–3.11)      | 705/1223 | 3.00 (2.80–3.19)      | <b>&lt;0.001</b> |
| <b>GH</b>                       | 45/422  | 3.43 (2.96–3.62)      | 157/1223 | 3.10 (2.72–3.52)      | <b>0.037</b>     |
| <b>HGF</b>                      | 45/422  | 2.26 (2.14–2.41)      | 158/1223 | 2.35 (2.24–2.48)      | <b>0.015</b>     |
| <b>ICAM-1</b>                   | 45/422  | 5.39 (5.24–5.61)      | 158/1223 | 5.34 (5.18–5.60)      | 0.376            |
| <b>IFN-<math>\gamma</math></b>  | 32/422  | 26.09 (21.99–32.58)   | 111/1223 | 21.99 (15.85–30.58)   | 0.051            |
| <b>IFNGR1</b>                   | 45/422  | 1.88 (1.84–2.00)      | 158/1223 | 1.87 (1.80–1.97)      | 0.161            |
| <b>IL-10</b>                    | 23/422  | 0.54 (0.22–1.12)      | 65/1223  | 0.48 (0.20–0.84)      | 0.638            |
| <b>IL-12</b>                    | 13/422  | 10.70 (6.58–28.37)    | 53/1223  | 35.22 (18.86–70.29)   | <b>0.005</b>     |
| <b>IL-13</b>                    | 22/422  | 2.21 (2.05–2.30)      | 72/1223  | 2.30 (2.12–2.44)      | <b>0.038</b>     |
| <b>IL-17A</b>                   | 18/422  | 1.94 (0.62–3.35)      | 57/1223  | 2.28 (0.67–4.96)      | 0.539            |
| <b>IL-17F</b>                   | 18/422  | 1.11 (0.76–1.52)      | 50/1223  | 1.02 (0.52–1.35)      | 0.483            |
| <b>IL-18BP</b>                  | 45/422  | 2.43 (2.32–2.64)      | 158/1223 | 2.49 (2.24–2.62)      | 0.733            |
| <b>IL-1<math>\alpha</math></b>  | 45/422  | 1.61 (1.44–1.72)      | 158/1223 | 1.56 (1.43–1.81)      | 0.921            |
| <b>IL-1<math>\beta</math></b>   | 25/422  | 4.49 (3.21–7.15)      | 84/1223  | 3.21 (1.85–4.88)      | <b>0.012</b>     |
| <b>IL-1R1</b>                   | 45/422  | 3.17 (3.06–3.23)      | 158/1223 | 3.12 (3.03–3.18)      | <b>0.049</b>     |
| <b>IL-1R2</b>                   | 194/422 | 3.84 (3.74–3.90)      | 707/1223 | 3.81 (3.73–3.89)      | <b>0.017</b>     |
| <b>IL-1RA</b>                   | 192/422 | 3.01 (2.89–3.19)      | 707/1223 | 2.96 (2.82–3.12)      | <b>0.001</b>     |
| <b>IL-2</b>                     | 32/422  | 1.98 (1.82–2.09)      | 115/1223 | 1.99 (1.82–2.13)      | 0.987            |
| <b>IL-22</b>                    | 7/422   | 1.24 (0.96–1.30)      | 30/1223  | 1.46 (0.99–1.72)      | 0.276            |
| <b>IL-23</b>                    | 45/422  | 2.61 (2.50–2.71)      | 158/1223 | 2.58 (2.45–2.70)      | 0.723            |
| <b>IL-27</b>                    | 21/422  | 185.83 (99.39–281.72) | 32/1223  | 161.14 (62.70–211.88) | 0.291            |
| <b>IL-28A</b>                   | 26/422  | 2.38 (1.86–2.68)      | 91/1223  | 2.12 (1.80–2.56)      | 0.343            |
| <b>IL-2R<math>\alpha</math></b> | 45/422  | 2.72 (2.62–2.89)      | 158/1223 | 2.73 (2.60–2.86)      | 0.688            |



|                                 |         |                        |          |                         |              |
|---------------------------------|---------|------------------------|----------|-------------------------|--------------|
| <b>IL-31</b>                    | 38/422  | 2.10 (2.02–2.17)       | 145/1223 | 2.06 (1.95–2.18)        | 0.470        |
| <b>IL-33</b>                    | 29/422  | 3.48 (2.19–5.21)       | 109/1223 | 6.13 (2.89–12.73)       | <b>0.013</b> |
| <b>IL-5</b>                     | 32/422  | 3.72 (3.10–4.16)       | 111/1223 | 3.78 (2.88–4.61)        | 0.720        |
| <b>IL-6</b>                     | 256/422 | 3.33 (2.90–3.60)       | 730/1223 | 3.42 (3.06–3.72)        | <b>0.006</b> |
| <b>IL-6R<math>\alpha</math></b> | 45/422  | 4.08 (4.01–4.11)       | 158/1223 | 4.08 (4.03–4.13)        | 0.457        |
| <b>IL-8</b>                     | 45/422  | 1.28 (1.16–1.41)       | 158/1223 | 1.34 (1.22–1.48)        | 0.068        |
| <b>IL-9</b>                     | 7/422   | 302.42 (194.84–529.25) | 33/1223  | 470.60 (241.68–1432.94) | 0.255        |
| <b>M-CSF</b>                    | 13/422  | 55.62 (31.77–67.73)    | 60/1223  | 104.13 (43.40–172.14)   | <b>0.011</b> |
| <b>MDC</b>                      | 45/422  | 2.87 (2.70–2.96)       | 158/1223 | 2.86 (2.74–2.95)        | 0.983        |
| <b>MIF</b>                      | 44/422  | 3.79 (3.55–3.95)       | 157/1223 | 3.75 (3.58–3.95)        | 0.755        |
| <b>MMP-1</b>                    | 45/422  | 3.29 (3.02–3.49)       | 158/1223 | 3.41 (3.25–3.59)        | <b>0.030</b> |
| <b>MMP-12</b>                   | 5/422   | 107.31 (98.79–130.23)  | 20/1223  | 103.16 (49.27–157.49)   | 0.760        |
| <b>MMP-13</b>                   | 41/422  | 2.58 (2.39–2.73)       | 128/1223 | 2.51 (2.33–2.65)        | 0.227        |
| <b>MMP-2</b>                    | 164/422 | 5.33 (5.26–5.42)       | 605/1223 | 5.35 (5.27–5.44)        | 0.150        |
| <b>MMP-3</b>                    | 45/422  | 4.22 (3.99–4.45)       | 158/1223 | 4.14 (3.95–4.37)        | 0.092        |
| <b>MMP-7</b>                    | 45/422  | 3.40 (3.24–3.55)       | 157/1223 | 3.46 (3.32–3.65)        | <b>0.045</b> |
| <b>MMP-8</b>                    | 193/422 | 3.51 (3.26–3.78)       | 705/1223 | 3.49 (3.25–3.76)        | 0.470        |
| <b>MMP-9</b>                    | 45/422  | 5.28 (5.02–5.44)       | 158/1223 | 5.31 (5.12–5.53)        | 0.182        |
| <b>MPO</b>                      | 45/422  | 5.12 (4.81–5.29)       | 158/1223 | 5.11 (4.87–5.31)        | 0.951        |
| <b>P-selectin</b>               | 45/422  | 4.60 (4.54–4.68)       | 158/1223 | 4.56 (4.46–4.65)        | 0.121        |
| <b>PF4</b>                      | 44/422  | 6.87 (6.79–6.97)       | 156/1223 | 6.95 (6.85–7.05)        | <b>0.004</b> |
| <b>PTX3</b>                     | 45/422  | 2.97 (2.80–3.33)       | 158/1223 | 3.01 (2.83–3.24)        | 0.922        |
| <b>TAC1</b>                     | 43/422  | 1.20 (0.92–1.28)       | 149/1223 | 1.04 (0.85–1.21)        | 0.106        |
| <b>TGF-<math>\beta</math></b>   | 258/422 | 8.01 (7.78–8.15)       | 735/1223 | 8.00 (7.52–8.17)        | 0.660        |
| <b>TNF-<math>\alpha</math></b>  | 258/422 | 2.95 (2.63–3.15)       | 734/1223 | 2.96 (2.65–3.14)        | 0.863        |
| <b>TNFR1</b>                    | 194/422 | 3.72 (3.62–3.81)       | 707/1223 | 3.69 (3.60–3.79)        | <b>0.029</b> |
| <b>TNFR2</b>                    | 45/422  | 3.40 (3.19–3.58)       | 157/1223 | 3.35 (3.21–3.55)        | 0.500        |
| <b>VCAM-1</b>                   | 45/422  | 6.05 (5.95–6.16)       | 158/1223 | 5.99 (5.86–6.12)        | 0.110        |
| <b>VEGF</b>                     | 45/422  | 1.77 (1.65–2.00)       | 158/1223 | 1.94 (1.71–2.07)        | <b>0.025</b> |
| <b>VEGF-C</b>                   | 41/422  | 3.00 (2.80–3.16)       | 151/1223 | 2.94 (2.73–3.13)        | 0.372        |
| <b>VEGFR3</b>                   | 45/422  | 2.14 (1.75–2.36)       | 158/1223 | 2.00 (1.63–2.31)        | 0.169        |

Data are presented as medians (interquartile range). In case of missing values, the total number of patients with available data is indicated. All *p* values are derived from non-parametrical Mann-Whitney *U* tests. Statistically significant *p* values are in bold.

BAFF: B cell activating factor belonging to the tumour necrosis factor ligand family; CCL13: C-C motif chemokine ligand 13; CCL17: C-C motif chemokine ligand 17; CCL18; C-C motif chemokine ligand 18; CCL2; C-C motif chemokine ligand 2; CCL20; C-C motif chemokine ligand 20; CCL3; C-C motif chemokine ligand 3; CCL4; C-C motif chemokine ligand 4; CCL5; C-C motif chemokine ligand 5; CCL7; C-C motif chemokine ligand 7; CCL8; C-C motif chemokine ligand 8; CRP: C-reactive protein; CXCL1: C-X-C motif ligand 1; CXCL10: C-X-C motif ligand 10; CXCL11: C-X-C motif ligand 11; CXCL13: C-X-C motif ligand 13; CXCL16: C-X-C motif ligand 16; CXCL5: C-X-C motif ligand 5; CXCL9: C-X-C motif ligand 9; DcR1: decoy receptor 1; DcR3: decoy receptor 3; EGF: epidermal growth factor; FasL; Fas ligand; FGF2: fibroblast growth factor 2; FGF21: fibroblast growth factor 21; G-CSF: granulocyte colony-stimulating factor; GDF15: growth differentiation factor 15; GH: growth hormone; HGF: hepatocyte growth factor; ICAM-1: intercellular adhesion molecule 1; IFN- $\gamma$ : interferon  $\gamma$ ; IFNGR1: interferon  $\gamma$  receptor 1; IL-10: interleukin 10; IL-12: interleukin 12; IL-13: interleukin 13; IL-17A: interleukin 17A; IL-17F: interleukin 17F; IL-18BP: interleukin 18 binding protein; IL-1 $\alpha$ : interleukin 1  $\alpha$ ; IL-1 $\beta$ : interleukin 1  $\beta$ ; IL-1R1: interleukin 1 receptor type 1; IL-1R2: interleukin 1 receptor type 2; IL-1RA: interleukin 1 receptor antagonist; IL-2: interleukin 2; IL-22: interleukin 22; IL-23: interleukin 23; IL-27: interleukin 27; IL-28A: interleukin 28A; IL-2R $\alpha$ : interleukin 2 receptor  $\alpha$ ; IL-31: interleukin 31; IL-33: interleukin 33; IL-5: interleukin 5; IL-6: interleukin 6; IL-6R $\alpha$ : interleukin 6 receptor  $\alpha$ ; IL-8: interleukin 8; IL-9: interleukin 9; M-CSF: macrophage colony-stimulating factor; MDC: macrophage-derived chemokine; MIF: macrophage migration inhibitory factor; MMP-1: matrix metalloproteinase 1; MMP-12: matrix metalloproteinase 12; MMP-13: matrix metalloproteinase 13; MMP-2: matrix metalloproteinase 2; MMP-3: matrix metalloproteinase 3; MMP-7: matrix metalloproteinase 7; MMP-8: matrix metalloproteinase 8; MMP-9: matrix metalloproteinase 9; MPO: myeloperoxidase; PF4: platelet factor 4; N/A: not applicable; N/A: not applicable; PTX3: pentraxin 3; SLE: systemic lupus erythematosus; TAC1: transmembrane activator and calcium modulator and cyclophilin ligand interactor; TGF- $\beta$ : transforming growth factor  $\beta$ ; TNF- $\alpha$ : tumour necrosis factor  $\alpha$ ; TNFR1: tumour necrosis factor receptor 1; TNFR2: tumour necrosis factor receptor 2; VCAM-1: vascular cell adhesion protein 1; VEGF: vascular endothelial growth factor; VEGF-C: vascular endothelial growth factor C; VEGFR3: vascular endothelial growth factor receptor 3.

\* Mixed connective tissue disease, primary antiphospholipid syndrome, primary Sjögren's syndrome, rheumatoid arthritis, and systemic sclerosis.

9 **Supplementary Table 8.** Serum levels of selected autoimmunity-associated cytokines in patients with pAPS versus healthy controls in the PRECISESADS study population

| Cytokines      | pAPS  |                        | HC      |                       | p value      |
|----------------|-------|------------------------|---------|-----------------------|--------------|
|                | n/N   | Serum levels (pg/mL)   | n/N     | Serum levels (pg/mL)  |              |
| BAFF           | 34/97 | 5.96 (5.68–6.03)       | 295/546 | 5.97 (5.87–6.05)      | 0.466        |
| CCL13          | 57/97 | 2.07 (1.93–2.21)       | 178/546 | 2.15 (2.04–2.26)      | <b>0.012</b> |
| CCL17          | 57/97 | 2.57 (2.34–2.90)       | 178/546 | 2.71 (2.50–2.87)      | 0.080        |
| CCL18          | 7/97  | 4.53 (4.45–4.60)       | 48/546  | 4.49 (4.38–4.55)      | 0.279        |
| CCL2           | 7/97  | 2.52 (2.46–2.53)       | 48/546  | 2.61 (2.55–2.70)      | <b>0.003</b> |
| CCL20          | 7/97  | 1.77 (1.62–2.11)       | 48/546  | 1.58 (1.46–1.78)      | 0.114        |
| CCL3           | 7/97  | 2.30 (2.22–2.43)       | 42/546  | 2.30 (2.13–2.46)      | 0.989        |
| CCL4           | 50/97 | 2.18 (2.06–2.32)       | 160/546 | 2.20 (1.95–2.52)      | 0.967        |
| CCL5           | 7/97  | 4.66 (4.58–4.72)       | 48/546  | 4.69 (4.55–4.84)      | 0.465        |
| CCL7           | 7/97  | 1.92 (1.72–1.95)       | 45/546  | 1.93 (1.62–2.21)      | 0.788        |
| CCL8           | 57/97 | 1.74 (1.66–1.87)       | 178/546 | 1.82 (1.72–1.94)      | <b>0.010</b> |
| CRP            | 52/97 | 6.22 (5.91–6.36)       | 143/546 | 5.97 (5.42–6.36)      | <b>0.015</b> |
| CXCL1          | 5/97  | 2.30 (2.09–2.46)       | 27/546  | 2.04 (1.91–2.30)      | 0.082        |
| CXCL10         | 57/97 | 1.31 (1.19–1.51)       | 178/546 | 1.28 (1.13–1.40)      | 0.050        |
| CXCL11         | 7/97  | 2.39 (2.34–2.49)       | 48/546  | 2.36 (2.27–2.46)      | 0.331        |
| CXCL13         | 57/97 | 1.82 (1.74–1.95)       | 175/546 | 1.78 (1.69–1.89)      | 0.073        |
| CXCL16         | 7/97  | 3.01 (2.98–3.09)       | 48/546  | 3.07 (3.02–3.10)      | 0.392        |
| CXCL5          | 7/97  | 3.09 (3.02–3.25)       | 48/546  | 3.15 (3.04–3.38)      | 0.795        |
| CXCL9          | 6/97  | 2.72 (2.71–2.77)       | 47/546  | 2.78 (2.67–2.86)      | 0.407        |
| DcR1           | 7/97  | 3.61 (3.52–3.77)       | 48/546  | 3.53 (3.39–3.60)      | 0.088        |
| DcR3           | 7/97  | 2.71 (2.65–2.82)       | 47/546  | 2.64 (2.48–2.75)      | 0.110        |
| E-selectin     | 7/97  | 4.37 (4.28–4.51)       | 48/546  | 4.38 (4.21–4.50)      | 0.739        |
| EGF            | 7/97  | 2.31 (2.22–2.34)       | 48/546  | 2.30 (2.04–2.39)      | 0.757        |
| Fas            | 7/97  | 3.86 (3.80–3.92)       | 48/546  | 3.86 (3.82–3.90)      | 0.912        |
| FasL           | 57/97 | 1.70 (1.55–1.80)       | 178/546 | 1.62 (1.54–1.73)      | <b>0.043</b> |
| FGF2           | 7/97  | 2.14 (2.10–2.17)       | 48/546  | 2.12 (2.06–2.24)      | 0.771        |
| FGF21          | 7/97  | 3.35 (3.20–3.47)       | 48/546  | 3.35 (3.17–3.46)      | 0.791        |
| G-CSF          | 7/97  | 1.44 (1.32–1.52)       | 47/546  | 1.39 (1.31–1.46)      | 0.652        |
| Galactin-3     | 7/97  | 3.86 (3.83–3.89)       | 48/546  | 3.85 (3.78–3.91)      | 0.683        |
| GDF15          | 57/97 | 2.74 (2.67–2.98)       | 178/546 | 2.70 (2.57–2.84)      | <b>0.005</b> |
| GH             | 7/97  | 3.10 (2.93–3.31)       | 48/546  | 3.02 (2.61–3.42)      | 0.762        |
| HGF            | 7/97  | 2.35 (2.33–2.49)       | 48/546  | 2.32 (2.23–2.40)      | 0.216        |
| ICAM-1         | 7/97  | 5.34 (5.31–5.52)       | 48/546  | 5.40 (5.18–5.52)      | 0.853        |
| IFN- $\gamma$  | 4/97  | 48.08 (30.91–223.32)   | 39/546  | 17.51 (13.79–20.56)   | <b>0.008</b> |
| IFNGR1         | 7/97  | 1.97 (1.91–2.01)       | 48/546  | 1.88 (1.79–1.92)      | <b>0.022</b> |
| IL-10          | 4/97  | 0.37 (0.19–0.81)       | 15/546  | 0.28 (0.19–0.56)      | 0.841        |
| IL-12          | 3/97  | 15.89 (10.20–16.37)    | 19/546  | 14.81 (6.11–30.33)    | N/A          |
| IL-13          | 5/97  | 2.29 (2.29–2.29)       | 24/546  | 2.33 (1.89–2.44)      | 0.706        |
| IL-17A         | 4/97  | 1.11 (0.46–13.72)      | 15/546  | 2.99 (1.86–4.99)      | 0.395        |
| IL-17F         | 3/97  | 1.17 (0.82–1.56)       | 12/546  | 0.94 (0.25–1.18)      | N/A          |
| IL-18BP        | 7/97  | 2.45 (2.42–2.58)       | 48/546  | 2.28 (2.05–2.44)      | <b>0.017</b> |
| IL-1 $\alpha$  | 7/97  | 1.54 (1.47–1.65)       | 48/546  | 1.52 (1.38–1.78)      | 0.810        |
| IL-1 $\beta$   | 3/97  | 3.90 (3.56–5.34)       | 31/546  | 3.17 (1.89–4.81)      | N/A          |
| IL-1R1         | 7/97  | 3.16 (3.10–3.22)       | 48/546  | 3.11 (3.07–3.16)      | 0.365        |
| IL-1R2         | 57/97 | 3.85 (3.78–3.89)       | 178/546 | 3.83 (3.77–3.89)      | 0.513        |
| IL-1RA         | 57/97 | 2.97 (2.89–3.13)       | 178/546 | 2.92 (2.78–3.05)      | <b>0.012</b> |
| IL-2           | 6/97  | 1.92 (1.85–2.14)       | 28/546  | 1.88 (1.66–2.06)      | 0.259        |
| IL-22          | 1/97  | 0.81 (0.81–0.81)       | 7/546   | 1.31 (0.84–1.46)      | N/A          |
| IL-23          | 7/97  | 2.57 (2.52–2.63)       | 48/546  | 2.56 (2.45–2.65)      | 0.791        |
| IL-27          | 3/97  | 162.33 (108.01–959.04) | 18/546  | 117.50 (48.72–188.24) | N/A          |
| IL-28A         | 3/97  | 2.35 (2.07–2.64)       | 27/546  | 2.05 (1.80–2.16)      | N/A          |
| IL-2R $\alpha$ | 7/97  | 2.72 (2.66–2.88)       | 48/546  | 2.63 (2.53–2.72)      | <b>0.007</b> |

|                                 |       |                           |         |                       |                  |
|---------------------------------|-------|---------------------------|---------|-----------------------|------------------|
| <b>IL-31</b>                    | 6/97  | 2.13 (1.80–2.19)          | 43/546  | 2.06 (1.93–2.21)      | 0.939            |
| <b>IL-33</b>                    | 4/97  | 22.42 (4.52–70.84)        | 33/546  | 3.07 (2.25–5.80)      | 0.117            |
| <b>IL-5</b>                     | 4/97  | 4.25 (3.61–4.53)          | 38/546  | 3.90 (3.47–4.50)      | 0.881            |
| <b>IL-6</b>                     | 33/97 | 3.24 (2.70–3.42)          | 290/546 | 3.18 (2.91–3.38)      | 0.588            |
| <b>IL-6R<math>\alpha</math></b> | 7/97  | 4.09 (4.08–4.13)          | 48/546  | 4.07 (4.03–4.12)      | 0.216            |
| <b>IL-8</b>                     | 7/97  | 1.48 (1.37–1.62)          | 48/546  | 1.29 (1.20–1.36)      | <b>0.007</b>     |
| <b>IL-9</b>                     | 2/97  | 2319.28 (1424.38–3214.17) | 6/546   | 263.29 (52.12–558.71) | N/A              |
| <b>M-CSF</b>                    | 3/97  | 354.61 (193.93–578.10)    | 16/546  | 58.42 (29.66–166.84)  | N/A              |
| <b>MDC</b>                      | 7/97  | 2.83 (2.79–2.90)          | 48/546  | 2.83 (2.70–2.91)      | 0.776            |
| <b>MIF</b>                      | 7/97  | 3.69 (3.51–3.91)          | 48/546  | 3.60 (3.44–3.83)      | 0.378            |
| <b>MMP-1</b>                    | 7/97  | 3.32 (3.16–3.43)          | 48/546  | 3.30 (3.12–3.45)      | 0.931            |
| <b>MMP-12</b>                   | 2/97  | 76.15 (56.19–96.11)       | 7/546   | 53.62 (35.45–91.67)   | N/A              |
| <b>MMP-13</b>                   | 6/97  | 2.61 (2.32–2.69)          | 40/546  | 2.54 (2.35–2.60)      | 0.557            |
| <b>MMP-2</b>                    | 52/97 | 5.28 (5.23–5.33)          | 143/546 | 5.35 (5.27–5.44)      | <b>&lt;0.001</b> |
| <b>MMP-3</b>                    | 7/97  | 4.10 (3.84–4.31)          | 47/546  | 4.09 (3.98–4.19)      | 0.980            |
| <b>MMP-7</b>                    | 7/97  | 3.38 (3.34–3.57)          | 48/546  | 3.32 (3.18–3.41)      | 0.181            |
| <b>MMP-8</b>                    | 57/97 | 3.57 (3.37–3.84)          | 178/546 | 3.57 (3.35–3.80)      | 0.770            |
| <b>MMP-9</b>                    | 7/97  | 5.35 (5.24–5.49)          | 48/546  | 5.35 (5.24–5.47)      | 0.931            |
| <b>MPO</b>                      | 7/97  | 5.44 (5.26–5.50)          | 48/546  | 5.08 (4.95–5.32)      | 0.059            |
| <b>P-selectin</b>               | 7/97  | 4.63 (4.60–4.66)          | 48/546  | 4.60 (4.55–4.66)      | 0.544            |
| <b>PF4</b>                      | 7/97  | 6.86 (6.82–7.03)          | 45/546  | 6.92 (6.87–7.05)      | 0.461            |
| <b>PTX3</b>                     | 7/97  | 3.48 (3.04–3.52)          | 48/546  | 3.04 (2.92–3.22)      | 0.067            |
| <b>TACI</b>                     | 7/97  | 1.08 (0.86–1.21)          | 45/546  | 1.04 (0.91–1.20)      | 0.862            |
| <b>TGF-<math>\beta</math></b>   | 34/97 | 8.13 (7.55–8.20)          | 295/546 | 8.07 (7.71–8.20)      | 0.899            |
| <b>TNF-<math>\alpha</math></b>  | 34/97 | 2.87 (1.80–3.08)          | 294/546 | 2.86 (2.63–2.98)      | 0.490            |
| <b>TNFR1</b>                    | 57/97 | 3.67 (3.63–3.78)          | 178/546 | 3.63 (3.57–3.71)      | <b>0.019</b>     |
| <b>TNFR2</b>                    | 6/97  | 3.35 (3.24–3.42)          | 48/546  | 3.32 (3.18–3.36)      | 0.426            |
| <b>VCAM-1</b>                   | 7/97  | 5.96 (5.84–6.08)          | 48/546  | 5.86 (5.79–5.94)      | 0.116            |
| <b>VEGF</b>                     | 7/97  | 1.76 (1.74–1.91)          | 48/546  | 1.84 (1.72–2.10)      | 0.378            |
| <b>VEGF-C</b>                   | 7/97  | 2.72 (2.60–3.10)          | 47/546  | 3.14 (2.92–3.26)      | 0.067            |
| <b>VEGFR3</b>                   | 7/97  | 2.48 (1.84–2.50)          | 48/546  | 2.14 (1.86–2.39)      | 0.587            |

Data are presented as medians (interquartile range). In case of missing values, the total number of patients with available data is indicated. All *p* values are derived from non-parametrical Mann-Whitney *U* tests. Statistically significant *p* values are in bold.

BAFF: B cell activating factor belonging to the tumour necrosis factor ligand family; CCL13: C-C motif chemokine ligand 13; CCL17: C-C motif chemokine ligand 17; CCL18: C-C motif chemokine ligand 18; CCL2: C-C motif chemokine ligand 2; CCL20: C-C motif chemokine ligand 20; CCL3: C-C motif chemokine ligand 3; CCL4: C-C motif chemokine ligand 4; CCL5: C-C motif chemokine ligand 5; CCL7: C-C motif chemokine ligand 7; CCL8: C-C motif chemokine ligand 8; CRP: C-reactive protein; CXCL1: C-X-C motif ligand 1; CXCL10: C-X-C motif ligand 10; CXCL11: C-X-C motif ligand 11; CXCL13: C-X-C motif ligand 13; CXCL16: C-X-C motif ligand 16; CXCL5: C-X-C motif ligand 5; CXCL9: C-X-C motif ligand 9; DcR1: decoy receptor 1; DcR3: decoy receptor 3; EGF: epidermal growth factor; FasL: Fas ligand; FGF2: fibroblast growth factor 2; FGF21: fibroblast growth factor 21; G-CSF: granulocyte colony-stimulating factor; GDF15: growth differentiation factor 15; GH: growth hormone; HC: healthy controls; HGF: hepatocyte growth factor; ICAM-1: intercellular adhesion molecule 1; IFN- $\gamma$ : interferon  $\gamma$ ; IFNGR1: interferon  $\gamma$  receptor 1; IL-10: interleukin 10; IL-12: interleukin 12; IL-13: interleukin 13; IL-17A: interleukin 17A; IL-17F: interleukin 17F; IL-18BP: interleukin 18 binding protein; IL-1 $\alpha$ : interleukin 1  $\alpha$ ; IL-1 $\beta$ : interleukin 1  $\beta$ ; IL-1R1: interleukin 1 receptor type 1; IL-1R2: interleukin 1 receptor type 2; IL-1RA: interleukin 1 receptor antagonist; IL-2: interleukin 2; IL-22: interleukin 22; IL-23: interleukin 23; IL-27: interleukin 27; IL-28A: interleukin 28A; IL-2R $\alpha$ : interleukin 2 receptor  $\alpha$ ; IL-31: interleukin 31; IL-33: interleukin 33; IL-5: interleukin 5; IL-6: interleukin 6; IL-6R $\alpha$ : interleukin 6 receptor  $\alpha$ ; IL-8: interleukin 8; IL-9: interleukin 9; M-CSF: macrophage colony-stimulating factor; MDC: macrophage-derived chemokine; MIF: macrophage migration inhibitory factor; MMP-1: matrix metalloproteinase 1; MMP-12: matrix metalloproteinase 12; MMP-13: matrix metalloproteinase 13; MMP-2: matrix metalloproteinase 2; MMP-3: matrix metalloproteinase 3; MMP-7: matrix metalloproteinase 7; MMP-8: matrix metalloproteinase 8; MMP-9: matrix metalloproteinase 9; MPO: myeloperoxidase; N/A: not applicable; pAPS: primary antiphospholipid syndrome; PF4: platelet factor 4; PTX3: pentraxin 3; TACI: transmembrane activator and calcium modulator and cyclophilin ligand interactor; TGF- $\beta$ : transforming growth factor  $\beta$ ; TNF- $\alpha$ : tumour necrosis factor  $\alpha$ ; TNFR1: tumour necrosis factor receptor 1; TNFR2: tumour necrosis factor receptor 2; VCAM-1: vascular cell adhesion protein 1; VEGF: vascular endothelial growth factor; VEGF-C: vascular endothelial growth factor C; VEGFR3: vascular endothelial growth factor receptor 3.

**10 Supplementary Table 9.** Serum levels of selected autoimmunity-associated cytokines in patients with SLE versus pAPS in the PRECISESADS study population

| Cytokines                       | SLE     |                       | pAPS  |                        | p value          |
|---------------------------------|---------|-----------------------|-------|------------------------|------------------|
|                                 | n/N     | Serum levels (pg/mL)  | n/N   | Serum levels (pg/mL)   |                  |
| <b>BAFF</b>                     | 258/422 | 6.04 (5.84–6.17)      | 34/97 | 5.96 (5.68–6.03)       | <b>0.006</b>     |
| <b>CCL13</b>                    | 194/422 | 2.16 (2.01–2.27)      | 57/97 | 2.07 (1.93–2.21)       | <b>0.040</b>     |
| <b>CCL17</b>                    | 194/422 | 2.80 (2.62–3.02)      | 57/97 | 2.57 (2.34–2.90)       | <b>&lt;0.001</b> |
| <b>CCL18</b>                    | 45/422  | 4.60 (4.49–4.68)      | 7/97  | 4.53 (4.45–4.60)       | 0.545            |
| <b>CCL2</b>                     | 45/422  | 2.65 (2.50–2.71)      | 7/97  | 2.52 (2.46–2.53)       | <b>0.028</b>     |
| <b>CCL20</b>                    | 45/422  | 1.68 (1.48–1.86)      | 7/97  | 1.77 (1.62–2.11)       | 0.228            |
| <b>CCL3</b>                     | 38/422  | 2.31 (2.15–2.47)      | 7/97  | 2.30 (2.22–2.43)       | 0.863            |
| <b>CCL4</b>                     | 184/422 | 2.23 (2.08–2.49)      | 50/97 | 2.18 (2.06–2.32)       | 0.314            |
| <b>CCL5</b>                     | 45/422  | 4.67 (4.46–4.81)      | 7/97  | 4.66 (4.58–4.72)       | 0.694            |
| <b>CCL7</b>                     | 44/422  | 1.99 (1.81–2.30)      | 7/97  | 1.92 (1.72–1.95)       | 0.298            |
| <b>CCL8</b>                     | 194/422 | 1.92 (1.76–2.05)      | 57/97 | 1.74 (1.66–1.87)       | <b>&lt;0.001</b> |
| <b>CRP</b>                      | 162/422 | 6.16 (5.61–6.57)      | 52/97 | 6.22 (5.91–6.36)       | 0.774            |
| <b>CXCL1</b>                    | 25/422  | 2.09 (1.94–2.20)      | 5/97  | 2.30 (2.09–2.46)       | 0.106            |
| <b>CXCL10</b>                   | 194/422 | 1.45 (1.29–1.77)      | 57/97 | 1.31 (1.19–1.51)       | <b>0.001</b>     |
| <b>CXCL11</b>                   | 45/422  | 2.46 (2.29–2.55)      | 7/97  | 2.39 (2.34–2.49)       | 0.668            |
| <b>CXCL13</b>                   | 194/422 | 2.02 (1.85–2.24)      | 57/97 | 1.82 (1.74–1.95)       | <b>&lt;0.001</b> |
| <b>CXCL16</b>                   | 45/422  | 3.11 (3.04–3.19)      | 7/97  | 3.01 (2.98–3.09)       | 0.097            |
| <b>CXCL5</b>                    | 45/422  | 3.06 (2.87–3.27)      | 7/97  | 3.09 (3.02–3.25)       | 0.563            |
| <b>CXCL9</b>                    | 45/422  | 2.78 (2.67–3.00)      | 6/97  | 2.72 (2.71–2.77)       | 0.236            |
| <b>DcR1</b>                     | 45/422  | 3.47 (3.33–3.64)      | 7/97  | 3.61 (3.52–3.77)       | 0.097            |
| <b>DcR3</b>                     | 45/422  | 2.64 (2.49–2.73)      | 7/97  | 2.71 (2.65–2.82)       | 0.249            |
| <b>E-selectin</b>               | 45/422  | 4.40 (4.26–4.49)      | 7/97  | 4.37 (4.28–4.51)       | 0.793            |
| <b>EGF</b>                      | 45/422  | 2.27 (2.06–2.44)      | 7/97  | 2.31 (2.22–2.34)       | 0.599            |
| <b>Fas</b>                      | 45/422  | 3.89 (3.83–4.02)      | 7/97  | 3.86 (3.80–3.92)       | 0.461            |
| <b>FasL</b>                     | 194/422 | 1.65 (1.49–1.78)      | 57/97 | 1.70 (1.55–1.80)       | 0.156            |
| <b>FGF2</b>                     | 45/422  | 2.18 (2.06–2.26)      | 7/97  | 2.14 (2.10–2.17)       | 0.658            |
| <b>FGF21</b>                    | 44/422  | 3.33 (3.18–3.45)      | 7/97  | 3.35 (3.20–3.47)       | 0.841            |
| <b>G-CSF</b>                    | 45/422  | 1.48 (1.41–1.55)      | 7/97  | 1.44 (1.32–1.52)       | 0.362            |
| <b>Galactin-3</b>               | 45/422  | 3.89 (3.79–3.98)      | 7/97  | 3.86 (3.83–3.89)       | 0.618            |
| <b>GDF15</b>                    | 194/422 | 2.89 (2.70–3.11)      | 57/97 | 2.74 (2.67–2.98)       | <b>0.036</b>     |
| <b>GH</b>                       | 45/422  | 3.43 (2.96–3.62)      | 7/97  | 3.10 (2.93–3.31)       | 0.356            |
| <b>HGF</b>                      | 45/422  | 2.26 (2.14–2.41)      | 7/97  | 2.35 (2.33–2.49)       | 0.143            |
| <b>ICAM-1</b>                   | 45/422  | 5.39 (5.24–5.61)      | 7/97  | 5.34 (5.31–5.52)       | 0.937            |
| <b>IFN-<math>\gamma</math></b>  | 32/422  | 26.09 (21.99–32.58)   | 4/97  | 48.08 (30.91–223.32)   | 0.144            |
| <b>IFNGR1</b>                   | 45/422  | 1.88 (1.84–2.00)      | 7/97  | 1.97 (1.91–2.01)       | 0.316            |
| <b>IL-10</b>                    | 23/422  | 0.54 (0.22–1.12)      | 4/97  | 0.37 (0.19–0.81)       | 0.785            |
| <b>IL-12</b>                    | 13/422  | 10.70 (6.58–28.37)    | 3/97  | 15.89 (10.20–16.37)    | N/A              |
| <b>IL-13</b>                    | 22/422  | 2.21 (2.05–2.30)      | 5/97  | 2.29 (2.29–2.29)       | 0.471            |
| <b>IL-17A</b>                   | 18/422  | 1.94 (0.62–3.35)      | 4/97  | 1.11 (0.46–13.72)      | 0.798            |
| <b>IL-17F</b>                   | 18/422  | 1.11 (0.76–1.52)      | 3/97  | 1.17 (0.82–1.56)       | N/A              |
| <b>IL-18BP</b>                  | 45/422  | 2.43 (2.32–2.64)      | 7/97  | 2.45 (2.42–2.58)       | 0.461            |
| <b>IL-1<math>\alpha</math></b>  | 45/422  | 1.61 (1.44–1.72)      | 7/97  | 1.54 (1.47–1.65)       | 0.655            |
| <b>IL-1<math>\beta</math></b>   | 25/422  | 4.49 (3.21–7.15)      | 3/97  | 3.90 (3.56–5.34)       | N/A              |
| <b>IL-1R1</b>                   | 45/422  | 3.17 (3.06–3.23)      | 7/97  | 3.16 (3.10–3.22)       | 0.854            |
| <b>IL-1R2</b>                   | 194/422 | 3.84 (3.74–3.90)      | 57/97 | 3.85 (3.78–3.89)       | 0.631            |
| <b>IL-1RA</b>                   | 192/422 | 3.01 (2.89–3.19)      | 57/97 | 2.97 (2.89–3.13)       | 0.388            |
| <b>IL-2</b>                     | 32/422  | 1.98 (1.82–2.09)      | 6/97  | 1.92 (1.85–2.14)       | 0.779            |
| <b>IL-22</b>                    | 7/422   | 1.24 (0.96–1.30)      | 1/97  | 0.81 (0.81–0.81)       | N/A              |
| <b>IL-23</b>                    | 45/422  | 2.61 (2.50–2.71)      | 7/97  | 2.57 (2.52–2.63)       | 0.629            |
| <b>IL-27</b>                    | 21/422  | 185.83 (99.39–281.72) | 3/97  | 162.33 (108.01–959.04) | N/A              |
| <b>IL-28A</b>                   | 26/422  | 2.38 (1.86–2.68)      | 3/97  | 2.35 (2.07–2.64)       | N/A              |
| <b>IL-2R<math>\alpha</math></b> | 45/422  | 2.72 (2.62–2.89)      | 7/97  | 2.72 (2.66–2.88)       | 0.581            |

|                                 |         |                        |       |                           |              |
|---------------------------------|---------|------------------------|-------|---------------------------|--------------|
| <b>IL-31</b>                    | 38/422  | 2.10 (2.02–2.17)       | 6/97  | 2.13 (1.80–2.19)          | 0.771        |
| <b>IL-33</b>                    | 29/422  | 3.48 (2.19–5.21)       | 4/97  | 22.42 (4.52–70.84)        | 0.116        |
| <b>IL-5</b>                     | 32/422  | 3.72 (3.10–4.16)       | 4/97  | 4.25 (3.61–4.53)          | 0.465        |
| <b>IL-6</b>                     | 256/422 | 3.33 (2.90–3.60)       | 33/97 | 3.24 (2.70–3.42)          | 0.142        |
| <b>IL-6R<math>\alpha</math></b> | 45/422  | 4.08 (4.01–4.11)       | 7/97  | 4.09 (4.08–4.13)          | 0.329        |
| <b>IL-8</b>                     | 45/422  | 1.28 (1.16–1.41)       | 7/97  | 1.48 (1.37–1.62)          | <b>0.021</b> |
| <b>IL-9</b>                     | 7/422   | 302.42 (194.84–529.25) | 2/97  | 2319.28 (1424.38–3214.17) | N/A          |
| <b>M-CSF</b>                    | 13/422  | 55.62 (31.77–67.73)    | 3/97  | 354.61 (193.93–578.10)    | N/A          |
| <b>MDC</b>                      | 45/422  | 2.87 (2.70–2.96)       | 7/97  | 2.83 (2.79–2.90)          | 0.753        |
| <b>MIF</b>                      | 44/422  | 3.79 (3.55–3.95)       | 7/97  | 3.69 (3.51–3.91)          | 0.904        |
| <b>MMP-1</b>                    | 45/422  | 3.29 (3.02–3.49)       | 7/97  | 3.32 (3.16–3.43)          | 0.854        |
| <b>MMP-12</b>                   | 5/422   | 107.31 (98.79–130.23)  | 2/97  | 76.15 (56.19–96.11)       | N/A          |
| <b>MMP-13</b>                   | 41/422  | 2.58 (2.39–2.73)       | 6/97  | 2.61 (2.32–2.69)          | 0.848        |
| <b>MMP-2</b>                    | 164/422 | 5.33 (5.26–5.42)       | 52/97 | 5.28 (5.23–5.33)          | <b>0.001</b> |
| <b>MMP-3</b>                    | 45/422  | 4.22 (3.99–4.45)       | 7/97  | 4.10 (3.84–4.31)          | 0.213        |
| <b>MMP-7</b>                    | 45/422  | 3.40 (3.24–3.55)       | 7/97  | 3.38 (3.34–3.57)          | 0.655        |
| <b>MMP-8</b>                    | 193/422 | 3.51 (3.26–3.78)       | 57/97 | 3.57 (3.37–3.84)          | 0.184        |
| <b>MMP-9</b>                    | 45/422  | 5.28 (5.02–5.44)       | 7/97  | 5.35 (5.24–5.49)          | 0.290        |
| <b>MPO</b>                      | 45/422  | 5.12 (4.81–5.29)       | 7/97  | 5.44 (5.26–5.50)          | <b>0.049</b> |
| <b>P-selectin</b>               | 45/422  | 4.60 (4.54–4.68)       | 7/97  | 4.63 (4.60–4.66)          | 0.581        |
| <b>PF4</b>                      | 44/422  | 6.87 (6.79–6.97)       | 7/97  | 6.86 (6.82–7.03)          | 0.564        |
| <b>PTX3</b>                     | 45/422  | 2.97 (2.80–3.33)       | 7/97  | 3.48 (3.04–3.52)          | 0.068        |
| <b>TACI</b>                     | 43/422  | 1.20 (0.92–1.28)       | 7/97  | 1.08 (0.86–1.21)          | 0.485        |
| <b>TGF-<math>\beta</math></b>   | 258/422 | 8.01 (7.78–8.15)       | 34/97 | 8.13 (7.55–8.20)          | 0.324        |
| <b>TNF-<math>\alpha</math></b>  | 258/422 | 2.95 (2.63–3.15)       | 34/97 | 2.87 (1.80–3.08)          | 0.211        |
| <b>TNFR1</b>                    | 194/422 | 3.72 (3.62–3.81)       | 57/97 | 3.67 (3.63–3.78)          | 0.135        |
| <b>TNFR2</b>                    | 45/422  | 3.40 (3.19–3.58)       | 6/97  | 3.35 (3.24–3.42)          | 0.658        |
| <b>VCAM-1</b>                   | 45/422  | 6.05 (5.95–6.16)       | 7/97  | 5.96 (5.84–6.08)          | 0.356        |
| <b>VEGF</b>                     | 45/422  | 1.77 (1.65–2.00)       | 7/97  | 1.76 (1.74–1.91)          | 1.000        |
| <b>VEGF-C</b>                   | 41/422  | 3.00 (2.80–3.16)       | 7/97  | 2.72 (2.60–3.10)          | 0.293        |
| <b>VEGFR3</b>                   | 45/422  | 2.14 (1.75–2.36)       | 7/97  | 2.48 (1.84–2.50)          | 0.272        |

Data are presented as medians (interquartile range). In case of missing values, the total number of patients with available data is indicated. All *p* values are derived from non-parametrical Mann-Whitney *U* tests. Statistically significant *p* values are in bold.

BAFF: B cell activating factor belonging to the tumour necrosis factor ligand family; CCL13: C-C motif chemokine ligand 13; CCL17: C-C motif chemokine ligand 17; CCL18: C-C motif chemokine ligand 18; CCL2: C-C motif chemokine ligand 2; CCL20: C-C motif chemokine ligand 20; CCL3: C-C motif chemokine ligand 3; CCL4: C-C motif chemokine ligand 4; CCL5: C-C motif chemokine ligand 5; CCL7: C-C motif chemokine ligand 7; CCL8: C-C motif chemokine ligand 8; CRP: C-reactive protein; CXCL1: C-X-C motif ligand 1; CXCL10: C-X-C motif ligand 10; CXCL11: C-X-C motif ligand 11; CXCL13: C-X-C motif ligand 13; CXCL16: C-X-C motif ligand 16; CXCL5: C-X-C motif ligand 5; CXCL9: C-X-C motif ligand 9; DcR1: decoy receptor 1; DcR3: decoy receptor 3; EGF: epidermal growth factor; FasL: Fas ligand; FGF2: fibroblast growth factor 2; FGF21: fibroblast growth factor 21; G-CSF: granulocyte colony-stimulating factor; GDF15: growth differentiation factor 15; GH: growth hormone; HC: healthy controls; HGF: hepatocyte growth factor; ICAM-1: intercellular adhesion molecule 1; IFN- $\gamma$ : interferon  $\gamma$ ; IFNGR1: interferon  $\gamma$  receptor 1; IL-10: interleukin 10; IL-12: interleukin 12; IL-13: interleukin 13; IL-17A: interleukin 17A; IL-17F: interleukin 17F; IL-18BP: interleukin 18 binding protein; IL-1 $\alpha$ : interleukin 1  $\alpha$ ; IL-1 $\beta$ : interleukin 1  $\beta$ ; IL-1R1: interleukin 1 receptor type 1; IL-1R2: interleukin 1 receptor type 2; IL-1RA: interleukin 1 receptor antagonist; IL-2: interleukin 2; IL-22: interleukin 22; IL-23: interleukin 23; IL-27: interleukin 27; IL-28A: interleukin 28A; IL-2R $\alpha$ : interleukin 2 receptor  $\alpha$ ; IL-31: interleukin 31; IL-33: interleukin 33; IL-5: interleukin 5; IL-6: interleukin 6; IL-6R $\alpha$ : interleukin 6 receptor  $\alpha$ ; IL-8: interleukin 8; IL-9: interleukin 9; M-CSF: macrophage colony-stimulating factor; MDC: macrophage-derived chemokine; MIF: macrophage migration inhibitory factor; MMP-1: matrix metalloproteinase 1; MMP-12: matrix metalloproteinase 12; MMP-13: matrix metalloproteinase 13; MMP-2: matrix metalloproteinase 2; MMP-3: matrix metalloproteinase 3; MMP-7: matrix metalloproteinase 7; MMP-8: matrix metalloproteinase 8; MMP-9: matrix metalloproteinase 9; MPO: myeloperoxidase; N/A: not applicable; pAPS: primary antiphospholipid syndrome; PF4: platelet factor 4; PTX3: pentraxin 3; SLE: systemic lupus erythematosus; TACI: transmembrane activator and calcium modulator and cyclophilin ligand interactor; TGF- $\beta$ : transforming growth factor  $\beta$ ; TNF- $\alpha$ : tumour necrosis factor  $\alpha$ ; TNFR1: tumour necrosis factor receptor 1; TNFR2: tumour necrosis factor receptor 2; VCAM-1: vascular cell adhesion protein 1; VEGF: vascular endothelial growth factor; VEGF-C: vascular endothelial growth factor C; VEGFR3: vascular endothelial growth factor receptor 3.

11 **Supplementary Table 10.** Serum levels of selected autoimmunity-associated cytokines in patients with pAPS versus other autoimmune diseases\* in the PRECISESADS study population

| Cytokines      | pAPS  |                        | AID      |                       | p value          |
|----------------|-------|------------------------|----------|-----------------------|------------------|
|                | n/N   | Serum levels (pg/mL)   | n/N      | Serum levels (pg/mL)  |                  |
| BAFF           | 34/97 | 5.96 (5.68–6.03)       | 701/1126 | 6.03 (5.89–6.13)      | <b>0.009</b>     |
| CCL13          | 57/97 | 2.07 (1.93–2.21)       | 650/1126 | 2.21 (2.08–2.34)      | <b>&lt;0.001</b> |
| CCL17          | 57/97 | 2.57 (2.34–2.90)       | 648/1126 | 2.81 (2.60–3.00)      | <b>&lt;0.001</b> |
| CCL18          | 7/97  | 4.53 (4.45–4.60)       | 151/1126 | 4.67 (4.51–4.75)      | 0.216            |
| CCL2           | 7/97  | 2.52 (2.46–2.53)       | 151/1126 | 2.67 (2.58–2.80)      | <b>0.001</b>     |
| CCL20          | 7/97  | 1.77 (1.62–2.11)       | 151/1126 | 1.70 (1.51–1.90)      | 0.473            |
| CCL3           | 7/97  | 2.30 (2.22–2.43)       | 132/1126 | 2.32 (2.20–2.50)      | 0.859            |
| CCL4           | 50/97 | 2.18 (2.06–2.32)       | 590/1126 | 2.17 (2.02–2.55)      | 0.982            |
| CCL5           | 7/97  | 4.66 (4.58–4.72)       | 151/1126 | 4.66 (4.54–4.78)      | 0.627            |
| CCL7           | 7/97  | 1.92 (1.72–1.95)       | 150/1126 | 2.09 (1.85–2.31)      | 0.126            |
| CCL8           | 57/97 | 1.74 (1.66–1.87)       | 650/1126 | 1.89 (1.74–2.01)      | <b>&lt;0.001</b> |
| CRP            | 52/97 | 6.22 (5.91–6.36)       | 550/1126 | 6.22 (5.75–6.59)      | 0.818            |
| CXCL1          | 5/97  | 2.30 (2.09–2.46)       | 86/1126  | 2.17 (1.99–2.30)      | 0.216            |
| CXCL10         | 57/97 | 1.31 (1.19–1.51)       | 650/1126 | 1.47 (1.26–1.69)      | <b>0.002</b>     |
| CXCL11         | 7/97  | 2.39 (2.34–2.49)       | 151/1126 | 2.45 (2.36–2.54)      | 0.415            |
| CXCL13         | 57/97 | 1.82 (1.74–1.95)       | 648/1126 | 1.96 (1.80–2.12)      | <b>&lt;0.001</b> |
| CXCL16         | 7/97  | 3.01 (2.98–3.09)       | 151/1126 | 3.06 (2.99–3.13)      | 0.720            |
| CXCL5          | 7/97  | 3.09 (3.02–3.25)       | 151/1126 | 3.17 (3.03–3.34)      | 0.670            |
| CXCL9          | 6/97  | 2.72 (2.71–2.77)       | 143/1126 | 2.86 (2.76–2.97)      | <b>0.020</b>     |
| DcR1           | 7/97  | 3.61 (3.52–3.77)       | 151/1126 | 3.51 (3.35–3.66)      | 0.086            |
| DcR3           | 7/97  | 2.71 (2.65–2.82)       | 150/1126 | 2.72 (2.58–2.92)      | 0.966            |
| E-selectin     | 7/97  | 4.37 (4.28–4.51)       | 151/1126 | 4.40 (4.27–4.52)      | 0.829            |
| EGF            | 7/97  | 2.31 (2.22–2.34)       | 151/1126 | 2.23 (2.04–2.35)      | 0.213            |
| Fas            | 7/97  | 3.86 (3.80–3.92)       | 151/1126 | 3.89 (3.77–3.97)      | 0.720            |
| FasL           | 57/97 | 1.70 (1.55–1.80)       | 647/1126 | 1.59 (1.45–1.72)      | <b>&lt;0.001</b> |
| FGF2           | 7/97  | 2.14 (2.10–2.17)       | 151/1126 | 2.16 (2.07–2.29)      | 0.710            |
| FGF21          | 7/97  | 3.35 (3.20–3.47)       | 150/1126 | 3.41 (3.31–3.53)      | 0.262            |
| G-CSF          | 7/97  | 1.44 (1.32–1.52)       | 148/1126 | 1.48 (1.37–1.58)      | 0.259            |
| Galactin-3     | 7/97  | 3.86 (3.83–3.89)       | 151/1126 | 3.90 (3.83–3.98)      | 0.368            |
| GDF15          | 57/97 | 2.74 (2.67–2.98)       | 648/1126 | 3.01 (2.83–3.20)      | <b>&lt;0.001</b> |
| GH             | 7/97  | 3.10 (2.93–3.31)       | 150/1126 | 3.10 (2.71–3.53)      | 0.993            |
| HGF            | 7/97  | 2.35 (2.33–2.49)       | 151/1126 | 2.36 (2.23–2.48)      | 0.540            |
| ICAM-1         | 7/97  | 5.34 (5.31–5.52)       | 151/1126 | 5.34 (5.18–5.61)      | 0.645            |
| IFN- $\gamma$  | 4/97  | 48.08 (30.91–223.32)   | 107/1126 | 21.98 (15.79–29.00)   | 0.051            |
| IFNGR1         | 7/97  | 1.97 (1.91–2.01)       | 151/1126 | 1.87 (1.80–1.96)      | 0.067            |
| IL-10          | 4/97  | 0.37 (0.19–0.81)       | 61/1126  | 0.48 (0.20–0.84)      | 0.859            |
| IL-12          | 3/97  | 15.89 (10.20–16.37)    | 50/1126  | 37.17 (23.16–77.15)   | N/A              |
| IL-13          | 5/97  | 2.29 (2.29–2.29)       | 67/1126  | 2.30 (2.12–2.44)      | 0.723            |
| IL-17A         | 4/97  | 1.11 (0.46–13.72)      | 53/1126  | 2.34 (0.72–4.96)      | 0.650            |
| IL-17F         | 3/97  | 1.17 (0.82–1.56)       | 47/1126  | 1.02 (0.52–1.34)      | N/A              |
| IL-18BP        | 7/97  | 2.45 (2.42–2.58)       | 151/1126 | 2.49 (2.23–2.62)      | 0.642            |
| IL-1 $\alpha$  | 7/97  | 1.54 (1.47–1.65)       | 151/1126 | 1.57 (1.43–1.82)      | 0.771            |
| IL-1 $\beta$   | 3/97  | 3.90 (3.56–5.34)       | 81/1126  | 3.18 (1.74–4.81)      | N/A              |
| IL-1R1         | 7/97  | 3.16 (3.10–3.22)       | 151/1126 | 3.12 (3.03–3.18)      | 0.325            |
| IL-1R2         | 57/97 | 3.85 (3.78–3.89)       | 650/1126 | 3.80 (3.72–3.88)      | <b>0.018</b>     |
| IL-1RA         | 57/97 | 2.97 (2.89–3.13)       | 650/1126 | 2.95 (2.81–3.12)      | 0.256            |
| IL-2           | 6/97  | 1.92 (1.85–2.14)       | 109/1126 | 1.99 (1.79–2.13)      | 0.739            |
| IL-22          | 1/97  | 0.81 (0.81–0.81)       | 29/1126  | 1.46 (1.01–1.73)      | N/A              |
| IL-23          | 7/97  | 2.57 (2.52–2.63)       | 151/1126 | 2.58 (2.45–2.70)      | 0.774            |
| IL-27          | 3/97  | 162.33 (108.01–959.04) | 29/1126  | 161.14 (65.70–211.40) | N/A              |
| IL-28A         | 3/97  | 2.35 (2.07–2.64)       | 88/1126  | 2.12 (1.80–2.56)      | N/A              |
| IL-2R $\alpha$ | 7/97  | 2.72 (2.66–2.88)       | 151/1126 | 2.74 (2.59–2.86)      | 0.529            |

|                                 |       |                           |          |                         |                  |
|---------------------------------|-------|---------------------------|----------|-------------------------|------------------|
| <b>IL-31</b>                    | 6/97  | 2.13 (1.80–2.19)          | 139/1126 | 2.06 (1.95–2.18)        | 0.816            |
| <b>IL-33</b>                    | 4/97  | 22.42 (4.52–70.84)        | 105/1126 | 6.13 (2.89–12.04)       | 0.318            |
| <b>IL-5</b>                     | 4/97  | 4.25 (3.61–4.53)          | 107/1126 | 3.67 (2.88–4.61)        | 0.681            |
| <b>IL-6</b>                     | 33/97 | 3.24 (2.70–3.42)          | 697/1126 | 3.42 (3.07–3.73)        | <b>0.004</b>     |
| <b>IL-6R<math>\alpha</math></b> | 7/97  | 4.09 (4.08–4.13)          | 151/1126 | 4.08 (4.03–4.13)        | 0.373            |
| <b>IL-8</b>                     | 7/97  | 1.48 (1.37–1.62)          | 151/1126 | 1.33 (1.22–1.48)        | 0.094            |
| <b>IL-9</b>                     | 2/97  | 2319.28 (1424.38–3214.17) | 31/1126  | 417.44 (241.68–1409.85) | N/A              |
| <b>M-CSF</b>                    | 3/97  | 354.61 (193.93–578.10)    | 57/1126  | 104.13 (43.52–162.59)   | N/A              |
| <b>MDC</b>                      | 7/97  | 2.83 (2.79–2.90)          | 151/1126 | 2.86 (2.74–2.96)        | 0.701            |
| <b>MIF</b>                      | 7/97  | 3.69 (3.51–3.91)          | 150/1126 | 3.75 (3.59–3.95)        | 0.610            |
| <b>MMP-1</b>                    | 7/97  | 3.32 (3.16–3.43)          | 151/1126 | 3.41 (3.25–3.59)        | 0.170            |
| <b>MMP-12</b>                   | 2/97  | 76.15 (56.19–96.11)       | 18/1126  | 103.16 (57.08–160.43)   | N/A              |
| <b>MMP-13</b>                   | 6/97  | 2.61 (2.32–2.69)          | 122/1126 | 2.51 (2.33–2.64)        | 0.668            |
| <b>MMP-2</b>                    | 52/97 | 5.28 (5.23–5.33)          | 553/1126 | 5.37 (5.28–5.45)        | <b>&lt;0.001</b> |
| <b>MMP-3</b>                    | 7/97  | 4.10 (3.84–4.31)          | 151/1126 | 4.15 (3.95–4.37)        | 0.670            |
| <b>MMP-7</b>                    | 7/97  | 3.38 (3.34–3.57)          | 150/1126 | 3.46 (3.32–3.65)        | 0.734            |
| <b>MMP-8</b>                    | 57/97 | 3.57 (3.37–3.84)          | 648/1126 | 3.48 (3.23–3.75)        | <b>0.048</b>     |
| <b>MMP-9</b>                    | 7/97  | 5.35 (5.24–5.49)          | 151/1126 | 5.30 (5.12–5.54)        | 0.563            |
| <b>MPO</b>                      | 7/97  | 5.44 (5.26–5.50)          | 151/1126 | 5.08 (4.86–5.27)        | <b>0.025</b>     |
| <b>P-selectin</b>               | 7/97  | 4.63 (4.60–4.66)          | 151/1126 | 4.56 (4.45–4.65)        | 0.281            |
| <b>PF4</b>                      | 7/97  | 6.86 (6.82–7.03)          | 149/1126 | 6.95 (6.85–7.05)        | 0.439            |
| <b>PTX3</b>                     | 7/97  | 3.48 (3.04–3.52)          | 151/1126 | 3.01 (2.82–3.23)        | <b>0.035</b>     |
| <b>TAC1</b>                     | 7/97  | 1.08 (0.86–1.21)          | 142/1126 | 1.04 (0.86–1.21)        | 0.914            |
| <b>TGF-<math>\beta</math></b>   | 34/97 | 8.13 (7.55–8.20)          | 701/1126 | 8.00 (7.52–8.16)        | 0.299            |
| <b>TNF-<math>\alpha</math></b>  | 34/97 | 2.87 (1.80–3.08)          | 700/1126 | 2.96 (2.65–3.14)        | 0.169            |
| <b>TNFR1</b>                    | 57/97 | 3.67 (3.63–3.78)          | 650/1126 | 3.69 (3.60–3.80)        | 0.839            |
| <b>TNFR2</b>                    | 6/97  | 3.35 (3.24–3.42)          | 151/1126 | 3.36 (3.20–3.56)        | 0.913            |
| <b>VCAM-1</b>                   | 7/97  | 5.96 (5.84–6.08)          | 151/1126 | 5.99 (5.86–6.12)        | 0.764            |
| <b>VEGF</b>                     | 7/97  | 1.76 (1.74–1.91)          | 151/1126 | 1.95 (1.71–2.09)        | 0.206            |
| <b>VEGF-C</b>                   | 7/97  | 2.72 (2.60–3.10)          | 144/1126 | 2.94 (2.75–3.13)        | 0.496            |
| <b>VEGFR3</b>                   | 7/97  | 2.48 (1.84–2.50)          | 151/1126 | 1.99 (1.60–2.30)        | 0.122            |

Data are presented as medians (interquartile range). In case of missing values, the total number of patients with available data is indicated. All *p* values are derived from non-parametrical Mann-Whitney *U* tests. Statistically significant *p* values are in bold.

BAFF: B cell activating factor belonging to the tumour necrosis factor ligand family; CCL13: C-C motif chemokine ligand 13; CCL17: C-C motif chemokine ligand 17; CCL18: C-C motif chemokine ligand 18; CCL2: C-C motif chemokine ligand 2; CCL20: C-C motif chemokine ligand 20; CCL3: C-C motif chemokine ligand 3; CCL4: C-C motif chemokine ligand 4; CCL5: C-C motif chemokine ligand 5; CCL7: C-C motif chemokine ligand 7; CCL8: C-C motif chemokine ligand 8; CRP: C-reactive protein; CXCL1: C-X-C motif ligand 1; CXCL10: C-X-C motif ligand 10; CXCL11: C-X-C motif ligand 11; CXCL13: C-X-C motif ligand 13; CXCL16: C-X-C motif ligand 16; CXCL5: C-X-C motif ligand 5; CXCL9: C-X-C motif ligand 9; DcR1: decoy receptor 1; DcR3: decoy receptor 3; EGF: epidermal growth factor; FasL: Fas ligand; FGF2: fibroblast growth factor 2; FGF21: fibroblast growth factor 21; G-CSF: granulocyte colony-stimulating factor; GDF15: growth differentiation factor 15; GH: growth hormone; HGF: hepatocyte growth factor; ICAM-1: intercellular adhesion molecule 1; IFN- $\gamma$ : interferon  $\gamma$ ; IFNGR1: interferon  $\gamma$  receptor 1; IL-10: interleukin 10; IL-12: interleukin 12; IL-13: interleukin 13; IL-17A: interleukin 17A; IL-17F: interleukin 17F; IL-18BP: interleukin 18 binding protein; IL-1 $\alpha$ : interleukin 1  $\alpha$ ; IL-1 $\beta$ : interleukin 1  $\beta$ ; IL-1R1: interleukin 1 receptor type 1; IL-1R2: interleukin 1 receptor type 2; IL-1RA: interleukin 1 receptor antagonist; IL-2: interleukin 2; IL-22: interleukin 22; IL-23: interleukin 23; IL-27: interleukin 27; IL-28A: interleukin 28A; IL-2R $\alpha$ : interleukin 2 receptor  $\alpha$ ; IL-31: interleukin 31; IL-33: interleukin 33; IL-5: interleukin 5; IL-6: interleukin 6; IL-6R $\alpha$ : interleukin 6 receptor  $\alpha$ ; IL-8: interleukin 8; IL-9: interleukin 9; M-CSF: macrophage colony-stimulating factor; MDC: macrophage-derived chemokine; MIF: macrophage migration inhibitory factor; MMP-1: matrix metalloproteinase 1; MMP-12: matrix metalloproteinase 12; MMP-13: matrix metalloproteinase 13; MMP-2: matrix metalloproteinase 2; MMP-3: matrix metalloproteinase 3; MMP-7: matrix metalloproteinase 7; MMP-8: matrix metalloproteinase 8; MMP-9: matrix metalloproteinase 9; MPO: myeloperoxidase; N/A: not applicable; pAPS: primary antiphospholipid syndrome; PF4: platelet factor 4; PTX3: pentraxin 3; TAC1: transmembrane activator and calcium modulator and cyclophilin ligand interactor; TGF- $\beta$ : transforming growth factor  $\beta$ ; TNF- $\alpha$ : tumour necrosis factor  $\alpha$ ; TNFR1: tumour necrosis factor receptor 1; TNFR2: tumour necrosis factor receptor 2; VCAM-1: vascular cell adhesion protein 1; VEGF: vascular endothelial growth factor; VEGF-C: vascular endothelial growth factor C; VEGFR3: vascular endothelial growth factor receptor 3.



\* Mixed connective tissue disease, primary Sjögren's syndrome, rheumatoid arthritis, and systemic sclerosis.

12 **Supplementary Table 11.** Correlations between cytokine levels and disease activity in patients with SLE

| Cytokines      | n/N     | Coefficient | p value      |
|----------------|---------|-------------|--------------|
| BAFF           | 32/297  | 0.15        | <b>0.019</b> |
| CCL13          | 23/297  | 0.01        | 0.848        |
| CCL17          | 13/297  | 0.08        | 0.312        |
| CCL18          | 18/297  | -0.21       | 0.221        |
| CCL2           | 25/297  | 0.15        | 0.401        |
| CCL20          | 21/297  | 0.32        | 0.059        |
| CCL3           | 29/297  | -0.24       | 0.201        |
| CCL4           | 32/297  | -0.09       | 0.264        |
| CCL5           | 13/297  | 0.15        | 0.402        |
| CCL7           | 251/297 | 0.26        | 0.142        |
| CCL8           | 168/297 | 0.21        | <b>0.005</b> |
| CRP            | 146/297 | 0.11        | 0.176        |
| CXCL1          | 35/297  | -0.36       | 0.133        |
| CXCL10         | 35/297  | 0.04        | 0.595        |
| CXCL11         | 35/297  | 0.18        | 0.290        |
| CXCL13         | 35/297  | 0.18        | <b>0.021</b> |
| CXCL16         | 35/297  | -0.05       | 0.769        |
| CXCL5          | 35/297  | -0.22       | 0.208        |
| CXCL9          | 168/297 | 0.25        | 0.152        |
| DeR1           | 34/297  | 0.20        | 0.248        |
| DeR3           | 35/297  | 0.02        | 0.893        |
| E-selectin     | 35/297  | -0.03       | 0.883        |
| EGF            | 35/297  | -0.09       | 0.613        |
| Fas            | 168/297 | 0.12        | 0.492        |
| FasL           | 19/297  | -0.01       | 0.849        |
| FGF2           | 35/297  | -0.02       | 0.907        |
| FGF21          | 35/297  | 0.00        | 0.994        |
| G-CSF          | 35/297  | -0.11       | 0.535        |
| Galactin-3     | 35/297  | 0.12        | 0.505        |
| GDF15          | 35/297  | 0.12        | 0.137        |
| GH             | 166/297 | 0.07        | 0.667        |
| HGF            | 35/297  | 0.19        | 0.280        |
| ICAM-1         | 168/297 | 0.02        | 0.908        |
| IFN- $\gamma$  | 18/297  | 0.00        | 0.995        |
| IFNGR1         | 35/297  | 0.22        | 0.202        |
| IL-10          | 35/297  | 0.18        | 0.403        |
| IL-12          | 22/297  | 0.44        | 0.133        |
| IL-13          | 35/297  | 0.36        | 0.141        |
| IL-17A         | 35/297  | 0.29        | 0.241        |
| IL-17F         | 21/297  | 0.35        | 0.170        |
| IL-18BP        | 29/297  | 0.21        | 0.230        |
| IL-1 $\alpha$  | 17/297  | -0.01       | 0.977        |
| IL-1 $\beta$   | 168/297 | 0.20        | 0.330        |
| IL-1R1         | 249/297 | 0.38        | <b>0.023</b> |
| IL-1R2         | 35/297  | 0.01        | 0.942        |
| IL-1RA         | 35/297  | 0.19        | <b>0.015</b> |
| IL-23          | 168/297 | 0.06        | 0.742        |
| IL-27          | 34/297  | 0.08        | 0.721        |
| IL-28A         | 168/297 | 0.27        | 0.230        |
| IL-2R $\alpha$ | 35/297  | 0.11        | 0.516        |
| IL-31          | 34/297  | -0.13       | 0.503        |
| IL-33          | 35/297  | 0.19        | 0.321        |
| IL-5           | 29/297  | 0.09        | 0.631        |
| IL-6           | 160/297 | 0.12        | 0.062        |

|                   |         |       |              |
|-------------------|---------|-------|--------------|
| <b>IL-6Ra</b>     | 35/297  | 0.06  | 0.718        |
| <b>IL-8</b>       | 35/297  | -0.01 | 0.961        |
| <b>M-CSF</b>      | 32/297  | 0.28  | 0.347        |
| <b>MDC</b>        | 148/297 | -0.11 | 0.518        |
| <b>MIF</b>        | 35/297  | 0.19  | 0.293        |
| <b>MMP-1</b>      | 35/297  | 0.25  | 0.146        |
| <b>MMP-13</b>     | 167/297 | 0.11  | 0.536        |
| <b>MMP-2</b>      | 35/297  | 0.01  | 0.879        |
| <b>MMP-3</b>      | 35/297  | 0.33  | 0.053        |
| <b>MMP-7</b>      | 35/297  | 0.04  | 0.800        |
| <b>MMP-8</b>      | 35/297  | 0.16  | <b>0.035</b> |
| <b>MMP-9</b>      | 35/297  | 0.16  | 0.352        |
| <b>MPO</b>        | 34/297  | 0.32  | 0.061        |
| <b>P-selectin</b> | 35/297  | -0.35 | <b>0.040</b> |
| <b>PF4</b>        | 33/297  | -0.06 | 0.750        |
| <b>PTX3</b>       | 168/297 | 0.38  | <b>0.023</b> |
| <b>TACI</b>       | 251/297 | -0.17 | 0.337        |
| <b>TGF-β</b>      | 251/297 | 0.07  | 0.246        |
| <b>TNF-α</b>      | 168/297 | 0.12  | 0.061        |
| <b>TNFR1</b>      | 35/297  | 0.10  | 0.188        |
| <b>TNFR2</b>      | 35/297  | 0.00  | 0.981        |
| <b>VCAM-1</b>     | 35/297  | 0.27  | 0.118        |
| <b>VEGF</b>       | 35/297  | -0.21 | 0.234        |
| <b>VEGF-C</b>     | 32/297  | -0.20 | 0.279        |
| <b>VEGFR3</b>     | 35/297  | -0.16 | 0.348        |

Spearman's rank correlation coefficients of correlations between levels of different cytokines and SLEDAI-2K scores. In case of missing values, the total number of patients with available data is indicated. Statistically significant *p* values are in bold. Only comparisons with sufficient numbers of observations ( $n \geq 10$ ) are included.

BAFF: B cell activating factor belonging to the tumour necrosis factor ligand family; CCL13: C-C motif chemokine ligand 13; CCL17: C-C motif chemokine ligand 17; CCL18: C-C motif chemokine ligand 18; CCL2: C-C motif chemokine ligand 2; CCL20: C-C motif chemokine ligand 20; CCL3: C-C motif chemokine ligand 3; CCL4: C-C motif chemokine ligand 4; CCL5: C-C motif chemokine ligand 5; CCL7: C-C motif chemokine ligand 7; CCL8: C-C motif chemokine ligand 8; CRP: C-reactive protein; CXCL1: C-X-C motif ligand 1; CXCL10: C-X-C motif ligand 10; CXCL11: C-X-C motif ligand 11; CXCL13: C-X-C motif ligand 13; CXCL16: C-X-C motif ligand 16; CXCL5: C-X-C motif ligand 5; CXCL9: C-X-C motif ligand 9; DcR1: decoy receptor 1; DcR3: decoy receptor 3; EGF: epidermal growth factor; FasL: Fas ligand; FGF2: fibroblast growth factor 2; FGF21: fibroblast growth factor 21; G-CSF: granulocyte colony-stimulating factor; GDF15: growth differentiation factor 15; GH: growth hormone; HGF: hepatocyte growth factor; ICAM-1: intercellular adhesion molecule 1; IFN- $\gamma$ : interferon  $\gamma$ ; IFNGR1: interferon  $\gamma$  receptor 1; IL-12: interleukin 12; IL-13: interleukin 13; IL-17A: interleukin 17A; IL-17F: interleukin 17F; IL-18BP: interleukin 18 binding protein; IL-1 $\alpha$ : interleukin 1  $\alpha$ ; IL-1 $\beta$ : interleukin 1 $\beta$ ; IL-1R1: interleukin 1 receptor type 1; IL-1R2: interleukin 1 receptor type 2; IL-1RA: interleukin 1 receptor antagonist; IL-23: interleukin 23; IL-27: interleukin 27; IL-28A: interleukin 28A; IL-2R $\alpha$ : interleukin 2 receptor  $\alpha$ ; IL-31: interleukin 31; IL-33: interleukin 33; IL-5: interleukin 5; IL-6: interleukin 6; IL-6R $\alpha$ : interleukin 6 receptor  $\alpha$ ; IL-8: interleukin 8; IL-9: interleukin 9; M-CSF: macrophage colony-stimulating factor; MDC: macrophage-derived chemokine; MIF: macrophage migration inhibitory factor; MMP-1: matrix metalloproteinase 1; MMP-12: matrix metalloproteinase 12; MMP-13: matrix metalloproteinase 13; MMP-2: matrix metalloproteinase 2; MMP-3: matrix metalloproteinase 3; MMP-7: matrix metalloproteinase 7; MMP-8: matrix metalloproteinase 8; MMP-9: matrix metalloproteinase 9; PF4: platelet factor 4; PTX3: pentraxin 3; SLEDAI-2K: Systemic Lupus Erythematosus Disease Activity Index 2000; TACI: transmembrane activator and calcium modulator and cyclophilin ligand interactor; TGF- $\beta$ : transforming growth factor  $\beta$ ; TNF- $\alpha$ : tumour necrosis factor  $\alpha$ ; TNFR1: tumour necrosis factor receptor 1; TNFR2: tumour necrosis factor receptor 2; VCAM-1: vascular cell adhesion protein 1; VEGF: vascular endothelial growth factor; VEGF-C: vascular endothelial growth factor C; VEGFR3: vascular endothelial growth factor receptor 3.

13 **Supplementary Table 12.** Correlations between positivity for selected serological markers and the cSLEDAI-2K CNS domain

| Serological marker | n/N     | Coefficient | <i>p</i> value |
|--------------------|---------|-------------|----------------|
| <b>B2G</b>         | 338/347 | 0.01        | 0.801          |
| <b>B2M</b>         | 338/347 | 0.01        | 0.808          |
| <b>C3C</b>         | 347/347 | -0.06       | 0.285          |
| <b>C4</b>          | 347/347 | 0.05        | 0.342          |
| <b>CHROMATIN</b>   | 312/347 | 0.02        | 0.671          |
| <b>CLG</b>         | 342/347 | 0.01        | 0.861          |
| <b>CLM</b>         | 342/347 | 0.04        | 0.505          |
| <b>DNA</b>         | 342/347 | -0.07       | 0.198          |
| <b>PFLC</b>        | 220/347 | 0.05        | 0.468          |
| <b>RF</b>          | 346/347 | 0.07        | 0.202          |
| <b>SM</b>          | 314/347 | -0.06       | 0.266          |
| <b>SSA52</b>       | 304/347 | -0.02       | 0.760          |
| <b>SSA60</b>       | 305/347 | 0.01        | 0.829          |
| <b>SSB</b>         | 315/347 | 0.02        | 0.739          |
| <b>U1RNP</b>       | 315/347 | -0.04       | 0.518          |

Phi ( $\phi$ ) correlations between autoantibody positivity or low levels of C3c or C4 and the cSLEDAI-2K CNS domain. In case of missing values, the total number of patients with available data is indicated. Statistically significant *p* values are in bold. B2G: anti- $\beta_2$  glycoprotein I IgG; B2M: anti- $\beta_2$  glycoprotein I IgM; C3c: complement component 3c; C4: complement component 4; CLG: anti-cardiolipin IgG; CLM: anti-cardiolipin IgM; CNS: central nervous system; cSLEDAI-2K: clinical Systemic Lupus Erythematosus Disease Activity Index 2000; DNA: anti-double stranded (ds)DNA; PFLC: polyclonal free light chains of kappa and lambda type; RF: rheumatoid factor; SM: anti-Smith; SSA52: anti-SSA/Ro52; SSA60: anti-SSA/Ro60; SSB: anti-SSB/La.

14 **Supplementary Table 13.** Correlations between positivity for selected serological markers and the cSLEDAI-2K vascular domain

| Serological marker | n/N     | Coefficient | <i>p</i> value |
|--------------------|---------|-------------|----------------|
| <b>B2G</b>         | 338/347 | -0.09       | 0.116          |
| <b>B2M</b>         | 338/347 | -0.07       | 0.216          |
| <b>C3C</b>         | 347/347 | 0.01        | 0.810          |
| <b>C4</b>          | 347/347 | 0.02        | 0.704          |
| <b>CHROMATIN</b>   | 312/347 | -0.01       | 0.845          |
| <b>CLG</b>         | 342/347 | -0.09       | 0.108          |
| <b>CLM</b>         | 342/347 | -0.08       | 0.165          |
| <b>DNA</b>         | 342/347 | -0.01       | 0.911          |
| <b>PFLC</b>        | 220/347 | 0.04        | 0.550          |
| <b>RF</b>          | 346/347 | 0.15        | <b>0.007</b>   |
| <b>SM</b>          | 314/347 | -0.05       | 0.344          |
| <b>SSA52</b>       | 304/347 | 0.08        | 0.163          |
| <b>SSA60</b>       | 305/347 | 0.05        | 0.403          |
| <b>SSB</b>         | 315/347 | 0.04        | 0.428          |
| <b>U1RNP</b>       | 315/347 | -0.06       | 0.264          |

Phi ( $\phi$ ) correlations between autoantibody positivity or low levels of C3c or C4 and the cSLEDAI-2K vascular domain. In case of missing values, the total number of patients with available data is indicated. Statistically significant *p* values are in bold.

B2G: anti- $\beta_2$  glycoprotein I IgG; B2M: anti- $\beta_2$  glycoprotein I IgM; C3c: complement component 3c; C4: complement component 4; CLG: anti-cardiolipin IgG; CLM: anti-cardiolipin IgM; cSLEDAI-2K: clinical Systemic Lupus Erythematosus Disease Activity Index 2000; DNA: anti-double stranded (ds)DNA; PFLC: polyclonal free light chains of kappa and lambda type; RF: rheumatoid factor; SM: anti-Smith; SSA52: anti-SSA/Ro52; SSA60: anti-SSA/Ro60; SSB: anti-SSB/La.

15 **Supplementary Table 14.** Correlations between positivity for selected serological markers and the cSLEDAI-2K musculoskeletal domain

| Serological marker | n/N     | Coefficient | <i>p</i> value |
|--------------------|---------|-------------|----------------|
| <b>B2G</b>         | 338/347 | -0.09       | 0.089          |
| <b>B2M</b>         | 338/347 | -0.05       | 0.357          |
| <b>C3C</b>         | 347/347 | 0.05        | 0.376          |
| <b>C4</b>          | 347/347 | 0.04        | 0.470          |
| <b>CHROMATIN</b>   | 312/347 | 0.06        | 0.276          |
| <b>CLG</b>         | 342/347 | -0.07       | 0.180          |
| <b>CLM</b>         | 342/347 | -0.07       | 0.185          |
| <b>DNA</b>         | 342/347 | 0.06        | 0.287          |
| <b>PFLC</b>        | 220/347 | 0.00        | 0.995          |
| <b>RF</b>          | 346/347 | 0.06        | 0.276          |
| <b>SM</b>          | 314/347 | 0.17        | <b>0.002</b>   |
| <b>SSA52</b>       | 304/347 | 0.06        | 0.289          |
| <b>SSA60</b>       | 305/347 | 0.14        | <b>0.014</b>   |
| <b>SSB</b>         | 315/347 | 0.07        | 0.200          |
| <b>U1RNP</b>       | 315/347 | 0.03        | 0.648          |

Phi ( $\phi$ ) correlations between autoantibody positivity or low levels of C3c or C4 and the cSLEDAI-2K musculoskeletal domain. In case of missing values, the total number of patients with available data is indicated. Statistically significant *p* values are in bold.

B2G: anti- $\beta_2$  glycoprotein I IgG; B2M: anti- $\beta_2$  glycoprotein I IgM; C3c: complement component 3c; C4: complement component 4; CLG: anti-cardiolipin IgG; CLM: anti-cardiolipin IgM; cSLEDAI-2K: clinical Systemic Lupus Erythematosus Disease Activity Index 2000; DNA: anti-double stranded (ds)DNA; PFLC: polyclonal free light chains of kappa and lambda type; RF: rheumatoid factor; SM: anti-Smith; SSA52: anti-SSA/Ro52; SSA60: anti-SSA/Ro60; SSB: anti-SSB/La.

**16 Supplementary Table 15.** Correlations between positivity for selected serological markers and the cSLEDAI-2K renal domain

| Serological marker | n/N     | Coefficient | <i>p</i> value |
|--------------------|---------|-------------|----------------|
| <b>B2G</b>         | 338/347 | 0.02        | 0.734          |
| <b>B2M</b>         | 338/347 | 0.01        | 0.867          |
| <b>C3C</b>         | 347/347 | -0.01       | 0.900          |
| <b>C4</b>          | 347/347 | -0.03       | 0.562          |
| <b>CHROMATIN</b>   | 312/347 | 0.19        | <b>0.001</b>   |
| <b>CLG</b>         | 342/347 | 0.01        | 0.878          |
| <b>CLM</b>         | 342/347 | -0.02       | 0.674          |
| <b>DNA</b>         | 342/347 | 0.14        | <b>0.008</b>   |
| <b>PFLC</b>        | 220/347 | 0.04        | 0.524          |
| <b>RF</b>          | 346/347 | 0.02        | 0.681          |
| <b>SM</b>          | 314/347 | 0.05        | 0.425          |
| <b>SSA52</b>       | 304/347 | -0.01       | 0.835          |
| <b>SSA60</b>       | 305/347 | -0.03       | 0.644          |
| <b>SSB</b>         | 315/347 | -0.04       | 0.527          |
| <b>U1RNP</b>       | 315/347 | -0.03       | 0.611          |

Phi ( $\phi$ ) correlations between autoantibody positivity or low levels of C3c or C4 and the cSLEDAI-2K renal domain. In case of missing values, the total number of patients with available data is indicated. Statistically significant *p* values are in bold. B2G: anti- $\beta_2$  glycoprotein I IgG; B2M: anti- $\beta_2$  glycoprotein I IgM; C3c: complement component 3c; C4: complement component 4; CLG: anti-cardiolipin IgG; CLM: anti-cardiolipin IgM; cSLEDAI-2K: clinical Systemic Lupus Erythematosus Disease Activity Index 2000; DNA: anti-double stranded (ds)DNA; PFLC: polyclonal free light chains of kappa and lambda type; RF: rheumatoid factor; SM: anti-Smith; SSA52: anti-SSA/Ro52; SSA60: anti-SSA/Ro60; SSB: anti-SSB/La.

**17 Supplementary Table 16.** Correlations between positivity for selected serological markers and the cSLEDAI-2K mucocutaneous domain

| Serological marker | n/N     | Coefficient | <i>p</i> value |
|--------------------|---------|-------------|----------------|
| <b>B2G</b>         | 338/347 | 0.03        | 0.636          |
| <b>B2M</b>         | 338/347 | 0.00        | 0.948          |
| <b>C3C</b>         | 347/347 | 0.00        | 0.937          |
| <b>C4</b>          | 347/347 | 0.05        | 0.352          |
| <b>CHROMATIN</b>   | 312/347 | 0.15        | <b>0.007</b>   |
| <b>CLG</b>         | 342/347 | 0.04        | 0.420          |
| <b>CLM</b>         | 342/347 | -0.04       | 0.486          |
| <b>DNA</b>         | 342/347 | 0.07        | 0.228          |
| <b>PFLC</b>        | 220/347 | 0.16        | <b>0.018</b>   |
| <b>RF</b>          | 346/347 | -0.01       | 0.900          |
| <b>SM</b>          | 314/347 | 0.02        | 0.769          |
| <b>SSA52</b>       | 304/347 | -0.01       | 0.902          |
| <b>SSA60</b>       | 305/347 | 0.03        | 0.564          |
| <b>SSB</b>         | 315/347 | 0.09        | 0.111          |
| <b>U1RNP</b>       | 315/347 | 0.08        | 0.164          |

Phi ( $\phi$ ) correlations between autoantibody positivity or low levels of C3c or C4 and the cSLEDAI-2K mucocutaneous domain. In case of missing values, the total number of patients with available data is indicated. Statistically significant *p* values are in bold.

B2G: anti- $\beta_2$  glycoprotein I IgG; B2M: anti- $\beta_2$  glycoprotein I IgM; C3c: complement component 3c; C4: complement component 4; CLG: anti-cardiolipin IgG; CLM: anti-cardiolipin IgM; cSLEDAI-2K: clinical Systemic Lupus Erythematosus Disease Activity Index 2000; DNA: anti-double stranded (ds)DNA; PFLC: polyclonal free light chains of kappa and lambda type; RF: rheumatoid factor; SM: anti-Smith; SSA52: anti-SSA/Ro52; SSA60: anti-SSA/Ro60; SSB: anti-SSB/La.



**18 Supplementary Table 17.** Correlations between positivity for selected serological markers and the cSLEDAI-2K serosal domain

| Serological marker | n/N     | Coefficient | <i>p</i> value |
|--------------------|---------|-------------|----------------|
| <b>B2G</b>         | 338/347 | 0.01        | 0.887          |
| <b>B2M</b>         | 338/347 | 0.03        | 0.549          |
| <b>C3C</b>         | 347/347 | -0.05       | 0.398          |
| <b>C4</b>          | 347/347 | -0.03       | 0.633          |
| <b>CHROMATIN</b>   | 312/347 | 0.11        | <b>0.043</b>   |
| <b>CLG</b>         | 342/347 | 0.01        | 0.922          |
| <b>CLM</b>         | 342/347 | 0.02        | 0.707          |
| <b>DNA</b>         | 342/347 | 0.14        | <b>0.010</b>   |
| <b>PFLC</b>        | 220/347 | 0.14        | <b>0.040</b>   |
| <b>RF</b>          | 346/347 | -0.04       | 0.457          |
| <b>SM</b>          | 314/347 | -0.03       | 0.581          |
| <b>SSA52</b>       | 304/347 | -0.02       | 0.763          |
| <b>SSA60</b>       | 305/347 | -0.03       | 0.581          |
| <b>SSB</b>         | 315/347 | -0.04       | 0.500          |
| <b>U1RNP</b>       | 315/347 | -0.02       | 0.716          |

Phi ( $\phi$ ) correlations between autoantibody positivity or low levels of C3c or C4 and the cSLEDAI-2K serosal domain. In case of missing values, the total number of patients with available data is indicated. Statistically significant *p* values are in bold.

B2G: anti- $\beta_2$  glycoprotein I IgG; B2M: anti- $\beta_2$  glycoprotein I IgM; C3c: complement component 3c; C4: complement component 4; CLG: anti-cardiolipin IgG; CLM: anti-cardiolipin IgM; cSLEDAI-2K: clinical Systemic Lupus Erythematosus Disease Activity Index 2000; DNA: anti-double stranded (ds)DNA; PFLC: polyclonal free light chains of kappa and lambda type; RF: rheumatoid factor; SM: anti-Smith; SSA52: anti-SSA/Ro52; SSA60: anti-SSA/Ro60; SSB: anti-SSB/La.

**19 Supplementary Table 18.** Correlations between positivity for selected serological markers and the cSLEDAI-2K constitutional domain

| Serological marker | n/N     | Coefficient | <i>p</i> value |
|--------------------|---------|-------------|----------------|
| <b>B2G</b>         | 338/347 | -0.04       | 0.482          |
| <b>B2M</b>         | 338/347 | -0.03       | 0.579          |
| <b>C3C</b>         | 347/347 | 0.08        | 0.145          |
| <b>C4</b>          | 347/347 | 0.10        | 0.071          |
| <b>CHROMATIN</b>   | 312/347 | 0.05        | 0.361          |
| <b>CLG</b>         | 342/347 | -0.04       | 0.472          |
| <b>CLM</b>         | 342/347 | -0.03       | 0.534          |
| <b>DNA</b>         | 342/347 | 0.04        | 0.461          |
| <b>PFLC</b>        | 220/347 | -0.06       | 0.353          |
| <b>RF</b>          | 346/347 | -0.03       | 0.601          |
| <b>SM</b>          | 314/347 | -0.02       | 0.698          |
| <b>SSA52</b>       | 304/347 | 0.03        | 0.625          |
| <b>SSA60</b>       | 305/347 | 0.17        | <b>0.004</b>   |
| <b>SSB</b>         | 315/347 | -0.03       | 0.635          |
| <b>U1RNP</b>       | 315/347 | 0.02        | 0.665          |

Phi ( $\phi$ ) correlations between autoantibody positivity or low levels of C3c or C4 and the cSLEDAI-2K constitutional domain. In case of missing values, the total number of patients with available data is indicated. Statistically significant *p* values are in bold.

B2G: anti- $\beta_2$  glycoprotein I IgG; B2M: anti- $\beta_2$  glycoprotein I IgM; C3c: complement component 3c; C4: complement component 4; CLG: anti-cardiolipin IgG; CLM: anti-cardiolipin IgM; cSLEDAI-2K: clinical Systemic Lupus Erythematosus Disease Activity Index 2000; DNA: anti-double stranded (ds)DNA; PFLC: polyclonal free light chains of kappa and lambda type; RF: rheumatoid factor; SM: anti-Smith; SSA52: anti-SSA/Ro52; SSA60: anti-SSA/Ro60; SSB: anti-SSB/La.

**20 Supplementary Table 19.** Correlations between positivity for selected serological markers and the cSLEDAI-2K haematological domain

| Serological marker | n/N     | Coefficient | <i>p</i> value |
|--------------------|---------|-------------|----------------|
| <b>B2G</b>         | 338/347 | -0.02       | 0.742          |
| <b>B2M</b>         | 338/347 | -0.03       | 0.590          |
| <b>C3C</b>         | 347/347 | 0.07        | 0.177          |
| <b>C4</b>          | 347/347 | 0.07        | 0.186          |
| <b>CHROMATIN</b>   | 312/347 | 0.02        | 0.687          |
| <b>CLG</b>         | 342/347 | -0.02       | 0.647          |
| <b>CLM</b>         | 342/347 | -0.03       | 0.564          |
| <b>DNA</b>         | 342/347 | 0.03        | 0.621          |
| <b>PFLC</b>        | 220/347 | -0.13       | 0.052          |
| <b>RF</b>          | 346/347 | 0.10        | 0.057          |
| <b>SM</b>          | 314/347 | -0.07       | 0.193          |
| <b>SSA52</b>       | 304/347 | 0.12        | <b>0.037</b>   |
| <b>SSA60</b>       | 305/347 | 0.14        | <b>0.011</b>   |
| <b>SSB</b>         | 315/347 | 0.05        | 0.355          |
| <b>U1RNP</b>       | 315/347 | -0.04       | 0.465          |

Phi ( $\phi$ ) correlations between autoantibody positivity or low levels of C3c or C4 and the cSLEDAI-2K haematological domain. In case of missing values, the total number of patients with available data is indicated. Statistically significant *p* values are in bold.

B2G: anti- $\beta_2$  glycoprotein I IgG; B2M: anti- $\beta_2$  glycoprotein I IgM; C3c: complement component 3c; C4: complement component 4; CLG: anti-cardiolipin IgG; CLM: anti-cardiolipin IgM; cSLEDAI-2K: clinical Systemic Lupus Erythematosus Disease Activity Index 2000; DNA: anti-double stranded (ds)DNA; PFLC: polyclonal free light chains of kappa and lambda type; RF: rheumatoid factor; SM: Smith; SSA52: anti-SSA/Ro52; SSA60: anti-SSA/Ro60; SSB: anti-SSB/La.

**21 Supplementary Table 20.** Correlations between positivity for selected serological markers and history of or current mucocutaneous manifestations

| Serological marker | n/N     | Coefficient | <i>p</i> value |
|--------------------|---------|-------------|----------------|
| <b>B2G</b>         | 249/253 | 0.04        | 0.503          |
| <b>B2M</b>         | 249/253 | -0.04       | 0.509          |
| <b>C3C</b>         | 253/253 | 0.03        | 0.639          |
| <b>C4</b>          | 253/253 | 0.02        | 0.769          |
| <b>CHROMATIN</b>   | 229/253 | 0.06        | 0.357          |
| <b>CLG</b>         | 253/253 | 0.08        | 0.201          |
| <b>CLM</b>         | 253/253 | -0.08       | 0.217          |
| <b>DNA</b>         | 253/253 | -0.03       | 0.644          |
| <b>PFLC</b>        | 151/253 | 0.11        | 0.175          |
| <b>RF</b>          | 252/253 | 0.06        | 0.336          |
| <b>SM</b>          | 237/253 | -0.01       | 0.823          |
| <b>SSA52</b>       | 231/253 | 0.01        | 0.894          |
| <b>SSA60</b>       | 232/253 | -0.03       | 0.602          |
| <b>SSB</b>         | 238/253 | -0.03       | 0.660          |
| <b>U1RNP</b>       | 238/253 | 0.06        | 0.333          |

Phi ( $\phi$ ) correlations between autoantibody positivity or low levels of C3c or C4 and any history of mucocutaneous manifestations. Mucocutaneous manifestations included malar rash, photosensitivity, acute cutaneous lupus, discoid lupus, chronic cutaneous lupus, mucosal ulcers, and alopecia. In case of missing values, the total number of patients with available data is indicated. Statistically significant *p* values are in bold.

B2G: anti- $\beta_2$  glycoprotein I IgG; B2M: anti- $\beta_2$  glycoprotein I IgM; C3c: complement component 3c; C4: complement component 4; CLG: anti-cardiolipin IgG; CLM: anti-cardiolipin IgM; CNS: central nervous system; DNA: anti-double stranded (ds)DNA; PFLC: polyclonal free light chains of kappa and lambda type; RF: rheumatoid factor; SM: Smith; SSA52: anti-SSA/Ro52; SSA60: anti-SSA/Ro60; SSB: anti-SSB/La.

**22 Supplementary Table 21.** Correlations between positivity for selected serological markers and history of or current arthritis

| Serological marker | n/N     | Coefficient | <i>p</i> value |
|--------------------|---------|-------------|----------------|
| <b>B2G</b>         | 249/253 | -0.11       | <b>0.095</b>   |
| <b>B2M</b>         | 249/253 | -0.03       | 0.630          |
| <b>C3C</b>         | 253/253 | 0.03        | 0.674          |
| <b>C4</b>          | 253/253 | -0.02       | 0.756          |
| <b>CHROMATIN</b>   | 229/253 | -0.02       | 0.747          |
| <b>CLG</b>         | 253/253 | -0.06       | 0.346          |
| <b>CLM</b>         | 253/253 | -0.05       | 0.469          |
| <b>DNA</b>         | 253/253 | 0.08        | 0.178          |
| <b>PFLC</b>        | 151/253 | 0.03        | 0.697          |
| <b>RF</b>          | 252/253 | 0.06        | 0.374          |
| <b>SM</b>          | 237/253 | 0.02        | 0.804          |
| <b>SSA52</b>       | 231/253 | -0.01       | 0.901          |
| <b>SSA60</b>       | 232/253 | 0.04        | 0.512          |
| <b>SSB</b>         | 238/253 | 0.03        | 0.640          |
| <b>U1RNP</b>       | 238/253 | 0.13        | 0.051          |

Phi ( $\phi$ ) correlations between autoantibody positivity or low levels of C3c or C4 and any history of arthritis. In case of missing values, the total number of patients with available data is indicated. Statistically significant *p* values are in bold.

B2G: anti- $\beta_2$  glycoprotein I IgG; B2M: anti- $\beta_2$  glycoprotein I IgM; C3c: complement component 3c; C4: complement component 4; CLG: anti-cardiolipin IgG; CLM: anti-cardiolipin IgM; DNA: anti-double stranded (ds)DNA; PFLC: polyclonal free light chains of kappa and lambda type; RF: rheumatoid factor; SM: anti-Smith; SSA52: anti-SSA/Ro52; SSA60: anti-SSA/Ro60; SSB: anti-SSB/La.

**23 Supplementary Table 22.** Correlations between positivity for selected serological markers and history of or current serositis

| Serological marker | n/N     | Coefficient | <i>p</i> value   |
|--------------------|---------|-------------|------------------|
| <b>B2G</b>         | 249/253 | 0.02        | 0.806            |
| <b>B2M</b>         | 249/253 | 0.07        | 0.298            |
| <b>C3C</b>         | 253/253 | -0.10       | 0.125            |
| <b>C4</b>          | 253/253 | -0.05       | 0.385            |
| <b>CHROMATIN</b>   | 229/253 | 0.17        | <b>0.009</b>     |
| <b>CLG</b>         | 253/253 | 0.03        | 0.603            |
| <b>CLM</b>         | 253/253 | 0.03        | 0.628            |
| <b>DNA</b>         | 253/253 | 0.18        | <b>0.003</b>     |
| <b>PFLC</b>        | 151/253 | 0.28        | <b>&lt;0.001</b> |
| <b>RF</b>          | 252/253 | 0.03        | 0.595            |
| <b>SM</b>          | 237/253 | -0.01       | 0.834            |
| <b>SSA52</b>       | 231/253 | 0.12        | 0.072            |
| <b>SSA60</b>       | 232/253 | 0.12        | 0.075            |
| <b>SSB</b>         | 238/253 | 0.02        | 0.804            |
| <b>U1RNP</b>       | 238/253 | 0.13        | <b>0.039</b>     |

Phi ( $\phi$ ) correlations between autoantibody positivity or low levels of C3c or C4 and any history of serositis. In case of missing values, the total number of patients with available data is indicated. Statistically significant *p* values are in bold.

B2G: anti- $\beta_2$  glycoprotein I IgG; B2M: anti- $\beta_2$  glycoprotein I IgM; C3c: complement component 3c; C4: complement component 4; CLG: anti-cardiolipin IgG; CLM: anti-cardiolipin IgM; DNA: anti-double stranded (ds)DNA; PFLC: polyclonal free light chains of kappa and lambda type; RF: rheumatoid factor; SM: anti-Smith; SSA52: anti-SSA/Ro52; SSA60: anti-SSA/Ro60; SSB: anti-SSB/La.

**24 Supplementary Table 23.** Correlations between positivity for selected serological markers and history of or current lupus nephritis

| Serological marker | n/N     | Coefficient | <i>p</i> value |
|--------------------|---------|-------------|----------------|
| <b>B2G</b>         | 249/253 | 0.01        | 0.928          |
| <b>B2M</b>         | 249/253 | 0.00        | 0.975          |
| <b>C3C</b>         | 253/253 | 0.00        | 0.962          |
| <b>C4</b>          | 253/253 | 0.01        | 0.900          |
| <b>CHROMATIN</b>   | 229/253 | 0.17        | <b>0.010</b>   |
| <b>CLG</b>         | 253/253 | 0.01        | 0.856          |
| <b>CLM</b>         | 253/253 | -0.01       | 0.854          |
| <b>DNA</b>         | 253/253 | 0.12        | 0.062          |
| <b>PFLC</b>        | 151/253 | 0.07        | 0.374          |
| <b>RF</b>          | 252/253 | -0.02       | 0.726          |
| <b>SM</b>          | 237/253 | 0.08        | 0.237          |
| <b>SSA52</b>       | 231/253 | -0.06       | 0.347          |
| <b>SSA60</b>       | 232/253 | 0.00        | 0.954          |
| <b>SSB</b>         | 238/253 | -0.05       | 0.461          |
| <b>U1RNP</b>       | 238/253 | -0.08       | 0.223          |

Phi ( $\phi$ ) correlations between autoantibody positivity or low levels of C3c or C4 and any history of lupus nephritis. In case of missing values, the total number of patients with available data is indicated. Statistically significant *p* values are in bold. B2G: anti- $\beta_2$  glycoprotein I IgG; B2M: anti- $\beta_2$  glycoprotein I IgM; C3c: complement component 3c; C4: complement component 4; CLG: anti-cardiolipin IgG; CLM: anti-cardiolipin IgM; DNA: anti-double stranded (ds)DNA; PFLC: polyclonal free light chains of kappa and lambda type; RF: rheumatoid factor; SM: anti-Smith; SSA52: anti-SSA/Ro52; SSA60: anti-SSA/Ro60; SSB: anti-SSB/La.

**25 Supplementary Table 24.** Correlations between positivity for selected serological markers and history of or current neuropsychiatric systemic lupus erythematosus

| Serological marker | n/N     | Coefficient | <i>p</i> value |
|--------------------|---------|-------------|----------------|
| <b>B2G</b>         | 249/253 | -0.01       | 0.871          |
| <b>B2M</b>         | 249/253 | 0.05        | 0.426          |
| <b>C3C</b>         | 253/253 | -0.04       | 0.557          |
| <b>C4</b>          | 253/253 | 0.09        | 0.159          |
| <b>CHROMATIN</b>   | 229/253 | 0.08        | 0.205          |
| <b>CLG</b>         | 253/253 | -0.02       | 0.790          |
| <b>CLM</b>         | 253/253 | 0.07        | 0.256          |
| <b>DNA</b>         | 253/253 | -0.03       | 0.689          |
| <b>PFLC</b>        | 151/253 | 0.08        | 0.350          |
| <b>RF</b>          | 252/253 | 0.16        | <b>0.010</b>   |
| <b>SM</b>          | 237/253 | -0.08       | 0.195          |
| <b>SSA52</b>       | 231/253 | 0.01        | 0.829          |
| <b>SSA60</b>       | 232/253 | 0.07        | 0.295          |
| <b>SSB</b>         | 238/253 | 0.04        | 0.572          |
| <b>U1RNP</b>       | 238/253 | -0.04       | 0.588          |

Phi ( $\phi$ ) correlations between autoantibody positivity or low levels of C3c or C4 and any history of neuropsychiatric systemic lupus erythematosus. In case of missing values, the total number of patients with available data is indicated. Statistically significant *p* values are in bold.

B2G: anti- $\beta_2$  glycoprotein I IgG; B2M: anti- $\beta_2$  glycoprotein I IgM; C3c: complement component 3c; C4: complement component 4; CLG: anti-cardiolipin IgG; CLM: anti-cardiolipin IgM; DNA: anti-double stranded (ds)DNA; PFLC: polyclonal free light chains of kappa and lambda type; RF: rheumatoid factor; SM: anti-Smith; SSA52: anti-SSA/Ro52; SSA60: anti-SSA/Ro60; SSB: anti-SSB/La.



**26 Supplementary Table 25.** Correlations between positivity for selected serological markers and history of or current haematological manifestations

| Serological marker | n/N     | Coefficient | <i>p</i> value |
|--------------------|---------|-------------|----------------|
| <b>B2G</b>         | 249/253 | -0.06       | 0.372          |
| <b>B2M</b>         | 249/253 | -0.01       | 0.933          |
| <b>C3C</b>         | 253/253 | 0.12        | 0.052          |
| <b>C4</b>          | 253/253 | 0.17        | <b>0.006</b>   |
| <b>CHROMATIN</b>   | 229/253 | 0.10        | 0.128          |
| <b>CLG</b>         | 253/253 | -0.06       | 0.316          |
| <b>CLM</b>         | 253/253 | -0.03       | 0.638          |
| <b>DNA</b>         | 253/253 | 0.14        | <b>0.024</b>   |
| <b>PFLC</b>        | 151/253 | -0.05       | 0.513          |
| <b>RF</b>          | 252/253 | 0.09        | 0.135          |
| <b>SM</b>          | 237/253 | 0.06        | 0.377          |
| <b>SSA52</b>       | 231/253 | 0.06        | 0.390          |
| <b>SSA60</b>       | 232/253 | 0.13        | <b>0.044</b>   |
| <b>SSB</b>         | 238/253 | 0.15        | <b>0.021</b>   |
| <b>U1RNP</b>       | 238/253 | -0.03       | 0.637          |

Phi ( $\phi$ ) correlations between autoantibody positivity or low levels of C3c or C4 and any history of haematological manifestations. Haematological manifestations included haemolytic anaemia, leukopenia, lymphopenia, and thrombocytopenia. In case of missing values, the total number of patients with available data is indicated. Statistically significant *p* values are in bold.

B2G: anti- $\beta_2$  glycoprotein I IgG; B2M: anti- $\beta_2$  glycoprotein I IgM; C3c: complement component 3c; C4: complement component 4; CLG: anti-cardiolipin IgG; CLM: anti-cardiolipin IgM; DNA: anti-double stranded (ds)DNA; PFLC: polyclonal free light chains of kappa and lambda type; RF: rheumatoid factor; SM: anti-Smith; SSA52: anti-SSA/Ro52; SSA60: anti-SSA/Ro60; SSB: anti-SSB/La.
